# Supplementary material for: A computational workflow to discover novel liquid organic hydrogen carriers and their dehydrogenation routes
Source: Royal Society of Chemistry journal article supplement (doi:10.1039/d0me00105h), 2020-01-01
Supplement: d0me00105h1.zip [file 14kPairs.xlsx]

## Sheet: Sheet1
Dehydrogenated Molecules	Melting Point (C)	Boiling Point (C)		Hydrogenated Molecules	Molecular Weight	Number H2s Transferred	MW H2	Hydrogen Weight Percent	Melting Point (C)	Boiling Point (C)	Synthetic Accessibility	Heat of Hydrogenation (kcal/mol)	Positive Heat of Hydrogenation (kcal/mol)
C(C(=O)C)(C)(C)C	-60.8979	111.33		C(C(O)C)(C)(C)C	102.177	1	2	1.95739	-23.8014	123.549	6.84805	12.46	12.46
C(=C)(OC)CC(=C(N)C)C	-61.9971	197.335		C(OC)(CC(C(N)C)C)C	145.246	2	4	2.75395	-68.4163	178.313	7.88544	26.05	26.05
C(=COC)OC	-82.1843	86.7702		O(CCOC)C	90.122	1	2	2.21921	-74.2913	79.6309	7.52263	34.21	34.21
C(C(=C)O)(C)(C)C	-38.2403	128.039		C(C(O)C)(C)(C)C	102.177	1	2	1.95739	-23.8014	123.549	6.84805	34.83	34.83
C(=C(O)C)(COC)C	-26.3516	175.425		C(C(COC)C)(O)C	118.176	1	2	1.69239	-26.0783	154.516	7.57982	28.9	28.9
C(=C(COC)O)(C)C	-31.7371	172.08		C(C(COC)O)(C)C	118.176	1	2	1.69239	-45.2758	150.09	7.02607	29.29	29.29
C(=C(N)C)(C)C	-60.7585	101.853		C(C(N)C)(C)C	87.166	1	2	2.29447	-62.0808	84.3563	7.23298	19.89	19.89
C(=CC(C(OC)(C)C)(O)C)(C)C	-22.9276	211.774		C(C(OC)(C)C)(CC(C)C)(O)C	174.284	1	2	1.14755	-22.9312	203.734	6.54617	26.19	26.19
C(C(OC)(C)C)(CC(=C)C)(O)C	-22.8973	211.781		C(C(OC)(C)C)(CC(C)C)(O)C	174.284	1	2	1.14755	-22.9312	203.734	6.54617	29.56	29.56
C(C(=O)C)(OC)(C)C	-72.6134	145.16		C(C(O)C)(OC)(C)C	118.176	1	2	1.69239	-44.92	146.385	6.78323	14.95	14.95
C(=C)(C(OC)(C)C)O	-34.7645	141.891		C(C(O)C)(OC)(C)C	118.176	1	2	1.69239	-44.92	146.385	6.78323	34.69	34.69
C(C(C(=C)C)(O)C)(OC)(C)C	-34.2709	202.925		C(C(OC)(C)C)(C(C)C)(O)C	160.257	1	2	1.248	-22.832	185.87	6.3445	29.68	29.68
C(C(=O)C)(COC)(C)C	-61.7725	157.737		C(C(O)C)(COC)(C)C	132.203	1	2	1.51282	-47.6409	168.554	6.90573	12.81	12.81
C(C(=C)O)(COC)(C)C	-37.9848	170.908		C(C(O)C)(COC)(C)C	132.203	1	2	1.51282	-47.6409	168.554	6.90573	34.98	34.98
C(C(OC)(C)C)(C=O)(C)C	-67.8877	166.581		C(C(OC)(C)C)(CO)(C)C	146.23	1	2	1.36771	-32.7796	178.885	7.84562	15.94	15.94
C(C(C=C)(OC)C)(C)(C)C	-89.4084	165.006		C(C(OC)(CC)C)(C)(C)C	144.258	1	2	1.3864	-85.6332	161.727	6.5326	31.53	31.53
C(C(C=O)(OC)C)(C)(C)C	-67.889	166.581		C(C(OC)(CO)C)(C)(C)C	146.23	1	2	1.36771	-31.151	180.428	6.66224	17.75	17.75
C(=C(OC)C)(C)C	-111.489	90.9063		C(C(OC)C)(C)C	102.177	1	2	1.95739	-96.4612	77.0332	6.85689	29.03	29.03
C(C(=C)OC)(C)(C)C	-101.473	112.405		C(C(OC)C)(C)(C)C	116.204	1	2	1.72111	-91.6334	95.9634	6.51295	34.32	34.32
C(C(=NN(C)C)C)(C)(C)C	-72.3313	166.568		C(C(NN(C)C)C)(C)(C)C	144.262	1	2	1.38637	-65.3781	151.429	6.88847	19.01	19.01
C(C(=C)NN(C)C)(C)(C)C	-65.3686	158.034		C(C(NN(C)C)C)(C)(C)C	144.262	1	2	1.38637	-65.3781	151.429	6.88847	25.58	25.58
C(C(=C)NOC)(C)(C)C	-32.7081	131.698		C(C(NOC)C)(C)(C)C	131.219	1	2	1.52417	-69.5258	127.778	6.92243	25.58	25.58
C(C(=NOC)C)(OC)(C)C	-44.7419	179.297		C(C(NOC)C)(OC)(C)C	147.218	1	2	1.35853	-10.9035	144.856	6.75948	22.98	22.98
C(=NN(C)C)(C)C	-31.8579	172.042		N(NC(C)C)(C)C	102.181	1	2	1.95731	-71.5096	124.127	7.9961	20.06	20.06
C(=C)(NN(C)C)C	-12.5339	133.009		N(NC(C)C)(C)C	102.181	1	2	1.95731	-71.5096	124.127	7.9961	23.21	23.21
C(C=O)(OC(=C(C)C)C)(C)C	-69.6727	202.024		C(CO)(OC(C(C)C)C)(C)C	160.257	2	4	2.49599	-40.2869	200.509	6.76767	25.68	25.68
C(=C)(COOC)C	-82.0008	99.4583		C(COOC)(C)C	104.149	1	2	1.92033	-70.3563	91.2227	7.76181	28.03	28.03
C(=COOC)(C)C	-82.1895	101.514		C(COOC)(C)C	104.149	1	2	1.92033	-70.3563	91.2227	7.76181	30.91	30.91
C(=CC(COC)(N)C)(C)C	-72.0639	168.975		C(COC)(CC(C)C)(N)C	145.246	1	2	1.37697	-68.2451	173.945	7.1914	27.14	27.14
C(=C)(CC(COC)(N)C)C	-71.8826	168.223		C(COC)(CC(C)C)(N)C	145.246	1	2	1.37697	-68.2451	173.945	7.1914	29.26	29.26
C(C(=O)OC)(C)(C)C	-92.3985	103.743		C(C(OC)O)(C)(C)C	118.176	1	2	1.69239	-22.1777	151.43	6.67057	-4.74	4.74
C(=C)(C(OC)OC)C	-76.6749	112.923		C(C(OC)OC)(C)C	118.176	1	2	1.69239	-80.0946	105.435	7.67104	29.29	29.29
C(=C(OC)OC)(C)C	-77.1013	122.985		C(C(OC)OC)(C)C	118.176	1	2	1.69239	-80.0946	105.435	7.67104	33.45	33.45
C(C=N)(C(OC)OC)(C)C	-11.6545	164.809		C(C(OC)OC)(CN)(C)C	147.218	1	2	1.35853	-22.3205	171.948	7.79917	22.68	22.68
C(N=C)(C(OC)OC)(C)C	-44.8021	191.343		C(C(OC)OC)(NC)(C)C	147.218	1	2	1.35853	-15.4373	155.726	7.8284	23.66	23.66
C(=NC)(CN(C)C)C	-21.7909	168.15		N(CC(NC)C)(C)C	116.208	1	2	1.72105	-20.2663	133.997	7.16664	22.06	22.06
C(C(=C)OCOC)(C)(C)C	-74.8177	148.012		C(C(OCOC)C)(C)(C)C	146.23	1	2	1.36771	-79.4641	139.765	6.18248	35.11	35.11
C(C(=C)ON)(C)(C)C	-32.6925	119.053		C(C(ON)C)(C)(C)C	117.192	1	2	1.7066	-36.6583	97.7235	6.83221	34.83	34.83
C(C1(C=COC1)C)(C)(C)C	-16.7398	162.74		C(C1(CCOC1)C)(C)(C)C	142.242	1	2	1.40605	-23.3569	172.443	6.92247	35.03	35.03
C(C1(C=CON1)C)(C)(C)C	-20.9932	159.133		C(C1(CCON1)C)(C)(C)C	143.23	1	2	1.39636	-34.168	147.333	7.14419	35.72	35.72
C(=COOC)(N(C)C)C	-42.63	177.336		N(C(COOC)C)(C)C	133.191	1	2	1.5016	-39.7635	163.332	6.59575	25.89	25.89
C(C1C(=C(CO1)C)C)(C)(C)C	-14.2032	179.982		C(C1C(C(CO1)C)C)(C)(C)C	156.269	1	2	1.27984	-22.9057	172.449	7.69803	23.73	23.73
C(=C)(N(C)C)COOC	-42.6498	175.643		N(C(COOC)C)(C)C	133.191	1	2	1.5016	-39.7635	163.332	6.59575	23.05	23.05
C(=C(OC)C)(O)C	-16.7148	163.818		C(C(OC)C)(O)C	104.149	1	2	1.92033	-42.0116	142.739	7.41211	33.18	33.18
C(C(=C)OC)(O)(C)C	-58.1436	141.784		C(C(OC)C)(O)(C)C	118.176	1	2	1.69239	-42.7048	146.562	6.78323	33.57	33.57
C(=C(OC)C)(OC)C	-77.0746	122.985		C(C(OC)C)(OC)C	118.176	1	2	1.69239	-79.8432	105.427	6.50811	31.42	31.42
C(=C(OC)C)(N)C	-12.1899	140.781		C(C(OC)C)(N)C	103.165	1	2	1.93864	-78.0051	115.492	7.654	23.52	23.52
C(C(=C)OC)(OC)(C)C	-74.1582	122.954		C(C(OC)C)(OC)(C)C	132.203	1	2	1.51282	-78.4048	126.468	5.73855	34.18	34.18
C(=CC(=C(C)C)C)(C)C	-59.8613	140.357		C(CC(C(C)C)C)(C)C	128.259	2	4	3.11869	-119.076	133.649	5.58543	22.31	22.31
C(=C)(CC(=C(C)C)C)C	-81.5823	141.874		C(CC(C(C)C)C)(C)C	128.259	2	4	3.11869	-119.076	133.649	5.58543	26.45	26.45
C(=C(O)C)(C)C	-92.0927	134.158		C(C(O)C)(C)C	88.15	1	2	2.26886	-27.8355	111.649	7.17357	29.22	29.22
C(=CC(=C(O)C)C)(OC)C	-18.3771	167.539		C(OC)(CC(C(O)C)C)C	146.23	2	4	2.73542	-47.2556	188.466	7.74641	28.46	28.46
C(C(=NC)C)(C)(C)C	-45.8357	130.462		C(C(NC)C)(C)(C)C	115.22	1	2	1.73581	-66.9226	118.83	6.99646	20.81	20.81
C(=O)(CC(=C(C)C)C)C	-30.6173	168.681		C(CC(C(C)C)C)(O)C	130.231	2	4	3.07147	-57.7478	159.383	7.49473	19.09	19.09
C(C(=N)C)(COC)(C)C	-67.1782	140.023		C(C(N)C)(COC)(C)C	131.219	1	2	1.52417	-68.1171	162.375	7.07178	19.52	19.52
C(C(=C)N)(COC)(C)C	-71.4979	158.292		C(C(N)C)(COC)(C)C	131.219	1	2	1.52417	-68.1171	162.375	7.07178	25.73	25.73
C(=C)(C(OC)(OC)C)N	-22.6493	152.68		C(C(N)C)(OC)(OC)C	133.191	1	2	1.5016	-28.2112	147.877	6.40529	25.3	25.3
C(C(=N)C)(C)(C)C	-26.6696	96.8278		C(C(N)C)(C)(C)C	101.193	1	2	1.97642	-43.686	103.384	6.92578	19.01	19.01
C(C(=C)N)(C)(C)C	-41.4702	113.817		C(C(N)C)(C)(C)C	101.193	1	2	1.97642	-43.686	103.384	6.92578	25.58	25.58
C(=CC(=C(COC)C)C)(O)C	-16.5456	227.72		C(CC(C(COC)C)C)(O)C	160.257	2	4	2.49599	-44.1177	202.15	7.78027	25.74	25.74
C(=C)(CC(=C(COC)C)C)O	-17.4873	226.934		C(CC(C(COC)C)C)(O)C	160.257	2	4	2.49599	-44.1177	202.15	7.78027	28.66	28.66
C(=C(CON)C)(C)C	-11.1336	133.299		C(C(CON)C)(C)C	117.192	1	2	1.7066	-44.7921	97.7692	6.93778	24.79	24.79
C(C(C(=O)OC)N(C)C)(C)(C)C	-46.0411	183.671		C(C(N(C)C)C(OC)O)(C)(C)C	175.272	1	2	1.14108	-10.5104	210.561	7.42899	-4.1	4.1
C(C(=C)N(C)C)(C)(C)C	-72.1086	151.005		C(C(N(C)C)C)(C)(C)C	129.247	1	2	1.54742	-71.5778	139.483	6.55469	25.38	25.38
C(=O)(CC(=C(COC)C)C)C	-61.3719	216.126		C(CC(C(COC)C)C)(O)C	160.257	2	4	2.49599	-44.1177	202.15	7.78027	19.52	19.52
C(C(=COC)C)(C)(C)C	-102.165	133.084		C(C(COC)C)(C)(C)C	130.231	1	2	1.53573	-93.1419	127.486	6.67267	33.06	33.06
C(C(=C)COC)(C)(C)C	-102.224	132.49		C(C(COC)C)(C)(C)C	130.231	1	2	1.53573	-93.1419	127.486	6.67267	31.01	31.01
C(C(=COC)C)(N)(C)C	-76.5299	162.733		C(C(COC)C)(N)(C)C	131.219	1	2	1.52417	-68.6097	161.724	7.14649	33.56	33.56
C(C(=C)COC)(N)(C)C	-76.5367	158.215		C(C(COC)C)(N)(C)C	131.219	1	2	1.52417	-68.6097	161.724	7.14649	31.45	31.45
C(C(=COC)C)(O)(C)C	-52.6259	168.298		C(C(COC)C)(O)(C)C	132.203	1	2	1.51282	-44.7524	168.684	6.8844	31.64	31.64
C(C(=C)COC)(O)(C)C	-52.6928	180.403		C(C(COC)C)(O)(C)C	132.203	1	2	1.51282	-44.7524	168.684	6.8844	30.26	30.26
C(=C(COC)N)(C)C	-15.63	149.343		C(C(COC)N)(C)C	117.192	1	2	1.7066	-78.7574	143.489	7.18327	19.96	19.96
C(C(=COC)O)(C)(C)C	-61.6443	168.132		C(C(COC)O)(C)(C)C	132.203	1	2	1.51282	-46.8941	168.146	6.7936	37.14	37.14
C(C(=O)COC)(C)(C)C	-61.7756	157.737		C(C(COC)O)(C)(C)C	132.203	1	2	1.51282	-46.8941	168.146	6.7936	14.57	14.57
C(C=NC=C)(C)(C)C	-18.2663	136.887		C(CNCC)(C)(C)C	115.22	2	4	3.47162	-66.7852	125.783	7.90509	24.01	24.01
C(=C)(CC(=C(COC)C)O)C	-12.4003	221.982		C(CC(C(COC)C)O)(C)C	160.257	2	4	2.49599	-21.1671	194.614	7.48745	28.7	28.7
C(=CC(=C(COC)C)O)(C)C	-12.1111	210.273		C(CC(C(COC)C)O)(C)C	160.257	2	4	2.49599	-21.1671	194.614	7.48745	24.74	24.74
C(=C)(OC)CC(=C(O)C)C	-19.2141	170.431		C(OC)(CC(C(O)C)C)C	146.23	2	4	2.73542	-47.2556	188.466	7.74641	30.92	30.92
C(=C(CN(C)C)C)(C)C	-67.0786	147.458		N(CC(C(C)C)C)(C)C	129.247	1	2	1.54742	-72.9025	139.2	6.66988	24.54	24.54
C(=C)(CN(C)C)C	-125.388	95.0751		N(CC(C)C)(C)C	101.193	1	2	1.97642	-126.11	82.3616	7.92475	27.86	27.86
C(=CN(C)C)(C)C	-125.136	116.3		N(CC(C)C)(C)C	101.193	1	2	1.97642	-126.11	82.3616	7.92475	21.34	21.34
C(=CN(C)C)(CN(C)C)C	-34.6443	159.438		N(CC(CN(C)C)C)(C)C	144.262	1	2	1.38637	-51.4087	163.351	7.71154	21.89	21.89
C(=C)(CN(C)C)CN(C)C	-35.0918	159.945		N(CC(CN(C)C)C)(C)C	144.262	1	2	1.38637	-51.4087	163.351	7.71154	27.73	27.73
C(C=N)(C)(C)C	-38.2698	76.5895		C(CN)(C)(C)C	87.166	1	2	2.29447	-63.793	83.7897	7.95377	21.66	21.66
C(CN(C=C)OC)(C)(C)C	-51.8492	150.995		C(CN(OC)CC)(C)(C)C	145.246	1	2	1.37697	-63.7919	149.149	7.84985	27.21	27.21
C(C=N)(CN(C(C)(C)C)C)(C)C	-12.5492	220.648		C(CN)(CN(C(C)(C)C)C)(C)C	172.316	1	2	1.16066	-23.8788	197.055	7.91696	21.82	21.82
C(=C(C=COC)O)(C)C	-27.5233	173.1		C(C(CCOC)O)(C)C	132.203	2	4	3.02565	-53.3147	169.468	7.08436	28.77	28.77
C(CN1CN(C(=C)C1)C)(C)(C)C	-16.8807	188.036		C(CN1CC(N(C1)C)C)(C)(C)C	170.3	1	2	1.1744	-20.5949	189.844	7.05978	21.98	21.98
C(CN1NC(=C(C1)C)C)(C)(C)C	-12.0062	222.34		C(CN1NC(C(C1)C)C)(C)(C)C	170.3	1	2	1.1744	-67.4752	196.338	7.66115	21.52	21.52
C(CN=C(C)C)(C)(C)C	-45.5677	148.947		C(CNC(C)C)(C)(C)C	129.247	1	2	1.54742	-53.6434	142.495	7.89232	21.06	21.06
C(C=NC)(C)(C)C	-62.6762	102.284		C(CNC)(C)(C)C	101.193	1	2	1.97642	-69.191	95.9343	7.97252	22.93	22.93
C(CN=C)(C)(C)C	-62.6756	104.625		C(CNC)(C)(C)C	101.193	1	2	1.97642	-69.191	95.9343	7.97252	26.24	26.24
C(=CC(=C(O)C)OC)(C)C	-34.4921	167.471		C(CC(C(O)C)OC)(C)C	146.23	2	4	2.73542	-42.2888	177.258	7.49419	27.49	27.49
C(=C)(CC(=C(O)C)OC)C	-19.6597	172.452		C(CC(C(O)C)OC)(C)C	146.23	2	4	2.73542	-42.2888	177.258	7.49419	31.28	31.28
C(=O)(CC(=C(OC)C)C)C	-48.6997	179.819		C(CC(C(OC)C)C)(O)C	146.23	2	4	2.73542	-32.4528	188.545	7.74641	21.37	21.37
C(=CC(=C(OC)C)O)(C)C	-28.3235	167.002		C(CC(C(OC)C)O)(C)C	146.23	2	4	2.73542	-44.8563	177.293	7.49419	27.49	27.49
C(=C)(CC(=C(OC)C)O)C	-16.953	178.269		C(CC(C(OC)C)O)(C)C	146.23	2	4	2.73542	-44.8563	177.293	7.49419	31.13	31.13
C(C=O)(C)(C)C	-15.7034	87.0044		C(CO)(C)(C)C	88.15	1	2	2.26886	-14.2886	114.161	7.92496	16.25	16.25
C(COC=C)(N)(C)C	-81.3679	140.394		C(COCC)(N)(C)C	117.192	1	2	1.7066	-84.009	143.56	7.95212	34.76	34.76
C(C=O)(COC)(C)C	-72.5573	145.013		C(CO)(COC)(C)C	118.176	1	2	1.69239	-47.8511	154.82	7.88739	16.6	16.6
C(COC(C(=O)C)(C)C)(C)(C)C	-61.2255	208.74		C(COC(C(O)C)(C)C)(C)(C)C	174.284	1	2	1.14755	-25.4179	204.143	6.56822	15.61	15.61
C(COC(C(=C)O)(C)C)(C)(C)C	-20.6405	211.628		C(COC(C(O)C)(C)C)(C)(C)C	174.284	1	2	1.14755	-25.4179	204.143	6.56822	34.11	34.11
C(COC(=C)C)(COC)(C)C	-72.0862	174.771		C(COC(C)C)(COC)(C)C	160.257	1	2	1.248	-71.977	169.528	7.718	33.46	33.46
C(=COC(=C(C)C)C)(C)C	-71.3507	169.732		C(COC(C(C)C)C)(C)C	144.258	2	4	2.77281	-86.117	153.471	6.43156	30.91	30.91
C(=C)(OCOC)C	-70.6922	95.5244		C(OCOC)(C)C	104.149	1	2	1.92033	-73.4858	92.1806	7.75967	32.74	32.74
C(=C)(COC(=C(C)C)C)C	-90.8691	170.097		C(COC(C(C)C)C)(C)C	144.258	2	4	2.77281	-86.117	153.471	6.43156	29.36	29.36
C(ON)(C=C(C)C)(C)C	-25.0702	137.783		C(ON)(CC(C)C)(C)C	131.219	1	2	1.52417	-52.455	128.511	7.91678	26.7	26.7
C(=C)(CC(ON)(C)C)C	-25.3089	142.74		C(ON)(CC(C)C)(C)C	131.219	1	2	1.52417	-52.455	128.511	7.91678	28.67	28.67
C(C1=C(COC1)C)(C)(C)C	-18.2453	180.301		C(C1C(COC1)C)(C)(C)C	142.242	1	2	1.40605	-23.0057	169.879	7.37131	24.09	24.09
C(C1C(=C)OCO1)(C)(C)C	-69.2502	167.288		C(C1C(OCO1)C)(C)(C)C	144.214	1	2	1.38683	-74.6488	145.318	7.0911	35	35
C(C1=C(OCO1)C)(C)(C)C	-69.2544	182.413		C(C1C(OCO1)C)(C)(C)C	144.214	1	2	1.38683	-74.6488	145.318	7.0911	32.59	32.59
C(=CC(=C(C)C)C)(OC)C	-71.3618	169.796		C(OC)(CC(C(C)C)C)C	144.258	2	4	2.77281	-86.0622	153.471	7.37214	25.43	25.43
C(=C)(OC)CC(=C(C)C)C	-90.8938	170.097		C(OC)(CC(C(C)C)C)C	144.258	2	4	2.77281	-86.0622	153.471	7.37214	28.11	28.11
C(=COC)(OC)C	-70.7703	101.164		C(OC)(COC)C	104.149	1	2	1.92033	-73.242	92.0771	6.26547	32.88	32.88
C(=C)(OC)COC	-70.7025	95.5863		C(OC)(COC)C	104.149	1	2	1.92033	-73.242	92.0771	6.26547	32.6	32.6
C(=NOC)(OC)C	-37.1193	153.462		C(OC)(NOC)C	105.137	1	2	1.90228	-24.0088	105.541	6.77798	9.16	9.16
C(=C)(CC(=C(C)C)O)C	-46.5651	172.465		C(CC(C(C)C)O)(C)C	130.231	2	4	3.07147	-58.0564	158.35	6.85288	28.76	28.76
C(=CC(=C(C)C)O)(C)C	-10.5738	173.258		C(CC(C(C)C)O)(C)C	130.231	2	4	3.07147	-58.0564	158.35	6.85288	24.65	24.65
C(=C(COC)C)(COC)C	-80.1275	161.144		C(C(COC)C)(COC)C	146.23	1	2	1.36771	-79.2095	142.364	6.65522	25.86	25.86
C(=C(COOC)C)(C)C	-90.6229	146.041		C(C(COOC)C)(C)C	132.203	1	2	1.51282	-69.7469	119.618	6.06615	24.79	24.79
C(=O)(CC(=C(C)C)COC)C	-61.3759	216.126		C(CC(C(C)C)COC)(O)C	160.257	2	4	2.49599	-43.9294	202.13	7.53755	19.37	19.37
C(=CC(=C(C)C)COC)(O)C	-16.3984	227.712		C(CC(C(C)C)COC)(O)C	160.257	2	4	2.49599	-43.9294	202.13	7.53755	25.49	25.49
C(=C)(CC(=C(C)C)COC)O	-17.3218	226.912		C(CC(C(C)C)COC)(O)C	160.257	2	4	2.49599	-43.9294	202.13	7.53755	28.63	28.63
C(=C)(O)C	-109.794	102.136		C(O)(C)C	60.096	1	2	3.32801	-96.9492	87.7756	5.52503	32.46	32.46
C(=C)(CC(OC)(C)C)O	-36.0477	170.844		C(OC)(CC(O)C)(C)C	132.203	1	2	1.51282	-25.5536	168.542	6.8844	33.32	33.32
C(=CC(OC)(C)C)(O)C	-34.304	168.293		C(OC)(CC(O)C)(C)C	132.203	1	2	1.51282	-25.5536	168.542	6.8844	31.36	31.36
C(OC)(CC(=O)C)(C)C	-61.7721	157.815		C(OC)(CC(O)C)(C)C	132.203	1	2	1.51282	-25.5536	168.542	6.8844	12.91	12.91
C(C=O)(COC=C)(C)C	-52.1983	161.924		C(CO)(COCC)(C)C	132.203	2	4	3.02565	-41.071	171.615	7.84503	25.74	25.74
C(=COC)(N)C	-10.3868	110.324		C(COC)(N)C	89.138	1	2	2.24371	-84.1625	99.3542	7.20869	25.18	25.18
C(=C)(COC)N	-20.2051	113.51		C(COC)(N)C	89.138	1	2	2.24371	-84.1625	99.3542	7.20869	23.86	23.86
C(=COC)(O)C	-33.8742	153.799		C(COC)(O)C	90.122	1	2	2.21921	-67.1813	125.917	7.01118	34.8	34.8
C(=O)(COC)C	-77.5068	113.672		C(COC)(O)C	90.122	1	2	2.21921	-67.1813	125.917	7.01118	15.71	15.71
C(=C)(COC)O	-36.2283	138.28		C(COC)(O)C	90.122	1	2	2.21921	-67.1813	125.917	7.01118	33.11	33.11
C(=C)(COC)COC	-76.907	120.473		C(COC)(COC)C	118.176	1	2	1.69239	-82.0091	108.26	7.67104	29.29	29.29
C(=COC)(COC)C	-77.1179	123.149		C(COC)(COC)C	118.176	1	2	1.69239	-82.0091	108.26	7.67104	30.58	30.58
C(C=O)(OC(C=C)(C)C)(C)C	-67.3093	183.568		C(CO)(OC(CC)(C)C)(C)C	160.257	2	4	2.49599	-23.1172	203.491	7.77419	25.38	25.38
C(=COCOC)(C)C	-77.1904	123.147		C(COCOC)(C)C	118.176	1	2	1.69239	-84.3148	107.682	7.80545	33.65	33.65
C(=C)(COCOC)C	-76.9978	120.402		C(COCOC)(C)C	118.176	1	2	1.69239	-84.3148	107.682	7.80545	29.12	29.12
C(C=O)(OC=C)(C)C	-11.4973	141.819		C(CO)(OCC)(C)C	118.176	2	4	3.38478	-48.7509	149.159	7.8398	27.14	27.14
C(=COC)(C=C)OC	-83.9655	132.882		C(OC)(CC)COC	118.176	2	4	3.38478	-82.3776	108.421	6.49611	31.4	31.4
C(=C1OC(=C(O1)C)C)(C)C	-23.3409	203.266		C(C1OC(C(O1)C)C)(C)C	144.214	2	4	2.77366	-74.6182	145.284	6.99361	34.55	34.55
C(=C)(C1OC(=C(O1)C)C)C	-25.32	213.761		C(C1OC(C(O1)C)C)(C)C	144.214	2	4	2.77366	-74.6182	145.284	6.99361	31.45	31.45
C(C=NC(=C)C)(C)(C)C	-22.6077	152.22		C(CNC(C)C)(C)(C)C	129.247	2	4	3.09485	-53.6434	142.495	7.89232	23.69	23.69
C(CN=C(C=C)C)(C)(C)C	-22.6182	164.068		C(CNC(CC)C)(C)(C)C	143.274	2	4	2.79185	-17.229	154.583	7.02871	24.69	24.69
C(OC)(C=C(C=N)C)(C)C	-13.0208	157.116		C(OC)(CC(CN)C)(C)C	145.246	2	4	2.75395	-72.0945	178.457	7.1129	23.16	23.16
C(OC)(CC(=C)C=N)(C)C	-12.9461	159.905		C(OC)(CC(CN)C)(C)C	145.246	2	4	2.75395	-72.0945	178.457	7.1129	24.8	24.8
C(OC)(C=C(C=O)C)(C)C	-65.896	175.268		C(OC)(CC(CO)C)(C)C	146.23	2	4	2.73542	-55.4558	191.555	6.96929	20.94	20.94
C(OC)(CC(=C)C=O)(C)C	-62.2372	170.587		C(OC)(CC(CO)C)(C)C	146.23	2	4	2.73542	-55.4558	191.555	6.96929	22.65	22.65
C(COC=C)(COC)(C)C	-74.9716	148.05		C(COCC)(COC)(C)C	146.23	1	2	1.36771	-79.1694	143.705	7.70605	34.89	34.89
C(COC(C=O)(C)C)(C)(C)C	-61.0013	191.693		C(COC(CO)(C)C)(C)(C)C	160.257	1	2	1.248	-40.7304	203.52	7.77989	19.4	19.4
C(=C)(NC(COC)(C)C)C	-73.077	160.136		C(COC)(NC(C)C)(C)C	145.246	1	2	1.37697	-60.8766	149.096	7.96569	26.67	26.67
C(COCC(=N)C)(C)(C)C	-13.5837	159.858		C(COCC(N)C)(C)(C)C	145.246	1	2	1.37697	-62.6846	173.934	6.86437	20.47	20.47
C(=C)(CC(=C)C)C	-88.8736	93.208		C(CC(C)C)(C)C	100.205	2	4	3.99182	-118.663	83.829	7.66716	28.79	28.79
C(COC=C(N)C)(C)(C)C	-11.2195	174.354		C(COCC(N)C)(C)(C)C	145.246	1	2	1.37697	-62.6846	173.934	6.86437	25.87	25.87
C(=CC(=C)C)(C)C	-76.501	95		C(CC(C)C)(C)C	100.205	2	4	3.99182	-118.663	83.829	7.66716	25.59	25.59
C(COCC(=C)N)(C)(C)C	-44.9691	168.353		C(COCC(N)C)(C)(C)C	145.246	1	2	1.37697	-62.6846	173.934	6.86437	23.28	23.28
C(COC=C)(C)(C)C	-103.546	112.532		C(COCC)(C)(C)C	116.204	1	2	1.72111	-92.5962	103.14	7.76146	34.84	34.84
C(C=O)(CC(C=C)(C)C)(C)C	-47.6807	191.523		C(CO)(CC(CC)(C)C)(C)C	158.285	2	4	2.52709	-37.152	204.931	7.83846	24.41	24.41
C(COC=C)(O)(C)C	-61.4124	151.919		C(COCC)(O)(C)C	118.176	1	2	1.69239	-37.227	150.519	7.8398	34.79	34.79
C(COCOC=C)(C)(C)C	-74.9748	148.05		C(COCOCC)(C)(C)C	146.23	1	2	1.36771	-79.0261	142.964	7.66408	34.79	34.79
C(N(C(=C)C)C)(C)(C)C	-72.1437	150.881		C(N(C(C)C)C)(C)(C)C	129.247	1	2	1.54742	-71.5859	138.576	7.84764	26.07	26.07
C(N(C(=C)N(C)C)C)(C)(C)C	-33.3215	178.853		C(N(C(N(C)C)C)C)(C)(C)C	158.289	1	2	1.26351	-76.8618	176.534	6.28912	21.09	21.09
C(N(C)C)(C=C)(C)C	-98.4288	137.013		C(N(C)C)(CC)(C)C	115.22	1	2	1.73581	-99.106	104.684	7.90509	30.87	30.87
C(N(C)C)(CN=C(C)C)(C)C	-50.3203	178.798		C(N(C)C)(CNC(C)C)(C)C	158.289	1	2	1.26351	-50.2969	193.934	7.94267	20.2	20.2
C(N(C)C)(C=NC)(C)C	-21.038	163.273		C(N(C)C)(CNC)(C)C	130.235	1	2	1.53569	-49.3143	145.183	7.96112	23.36	23.36
C(N(C)C)(CN=C)(C)C	-56.7773	162.103		C(N(C)C)(CNC)(C)C	130.235	1	2	1.53569	-49.3143	145.183	7.96112	25.3	25.3
C(N(C1=C(COC1)O)C)(C)(C)C	-15.1212	267.621		C(N(C1C(COC1)O)C)(C)(C)C	173.256	1	2	1.15436	-12.6839	234.15	7.57799	22.44	22.44
C(C=O)(C=C(OC)C)(C)C	-65.8961	175.268		C(CO)(CC(OC)C)(C)C	146.23	2	4	2.73542	-24.3251	191.36	6.98683	24.19	24.19
C(C=O)(CC(=C)OC)(C)C	-62.2373	170.615		C(CO)(CC(OC)C)(C)C	146.23	2	4	2.73542	-24.3251	191.36	6.98683	24.6	24.6
C(N(CC(=NC)C)C)(C)(C)C	-50.3427	178.803		C(N(CC(NC)C)C)(C)(C)C	158.289	1	2	1.26351	-47.9594	193.92	7.06671	23.32	23.32
C(N(C=C)C)(CN(C)C)(C)C	-33.2112	179		C(N(CC)C)(CN(C)C)(C)C	158.289	1	2	1.26351	-76.5511	176.912	7.80587	27.56	27.56
C(N(C=C)C)(C)(C)C	-98.3	144.932		C(N(CC)C)(C)(C)C	115.22	1	2	1.73581	-98.9844	104.799	7.90509	27.5	27.5
C(=C(N(C(=C(O)C)C)C)C)(C)C	-17.0793	237.636		C(C(N(C(C(O)C)C)C)C)(C)C	173.3	2	4	2.30814	-17.052	211.888	7.79848	21.98	21.98
C(N(N(C)C)C=C)(C)(C)C	-79.9642	149.263		C(N(N(C)C)CC)(C)(C)C	144.262	1	2	1.38637	-64.846	161.138	7.85742	27.6	27.6
C(N(N=C)C)(C)(C)C	-31.854	156.236		C(N(NC)C)(C)(C)C	116.208	1	2	1.72105	-71.2519	132.028	7.96963	25.36	25.36
C(N=C)(C)(C)C	-105.996	82.1045		C(NC)(C)(C)C	87.166	1	2	2.29447	-66.5197	79.8671	7.99628	26.7	26.7
C(N=C(C)C)(C)(C)C	-45.886	130.45		C(NC(C)C)(C)(C)C	115.22	1	2	1.73581	-53.2619	102.672	7.88957	20.18	20.18
C(NC(=C)C)(C)(C)C	-67.3099	123.838		C(NC(C)C)(C)(C)C	115.22	1	2	1.73581	-53.2619	102.672	7.88957	26.17	26.17
C(N=C(CN(C)C)C)(C)(C)C	-50.2818	178.789		C(NC(CN(C)C)C)(C)(C)C	158.289	1	2	1.26351	-54.8913	193.958	6.9769	20.23	20.23
C(NC(=CN(C)C)C)(C)(C)C	-50.9061	197.566		C(NC(CN(C)C)C)(C)(C)C	158.289	1	2	1.26351	-54.8913	193.958	6.9769	19.69	19.69
C(NC(=C)CN(C)C)(C)(C)C	-47.6288	201.999		C(NC(CN(C)C)C)(C)(C)C	158.289	1	2	1.26351	-54.8913	193.958	6.9769	26.04	26.04
C(NN=C(C)C)(C)(C)C	-10.357	142.057		C(NNC(C)C)(C)(C)C	130.235	1	2	1.53569	-12.29	130.526	7.86459	20.06	20.06
C(NNC(=C(C)C)C)(C)(C)C	-10.0751	167.508		C(NNC(C(C)C)C)(C)(C)C	158.289	1	2	1.26351	-65.4288	162.865	6.83147	19.89	19.89
C(NNC(C=C)(C)C)(C)(C)C	-42.9731	164.764		C(NNC(CC)(C)C)(C)(C)C	158.289	1	2	1.26351	-62.8661	163.059	7.76779	32.23	32.23
C(OC)(CC(=O)C(C)(C)C)(C)C	-61.209	208.74		C(C(CC(OC)(C)C)O)(C)(C)C	174.284	1	2	1.14755	-31.4498	203.889	6.69469	11.77	11.77
C(OCC(C=N)(C)C)(C)(C)C	-28.7654	174.54		C(CN)(COC(C)(C)C)(C)C	159.273	1	2	1.25571	-71.8509	194.344	7.87216	22.05	22.05
C(OC)(CC(C=O)(C)C)(C)C	-60.9674	191.693		C(CO)(CC(OC)(C)C)(C)C	160.257	1	2	1.248	-31.2565	197.616	7.88139	16.49	16.49
C(OCC(C=O)(C)C)(C)(C)C	-60.9985	191.693		C(CO)(COC(C)(C)C)(C)C	160.257	1	2	1.248	-22.397	197.673	7.77989	17.2	17.2
C(NC(=C(C)C)C)(C)(C)C	-37.3006	164.302		C(NC(C(C)C)C)(C)(C)C	143.274	1	2	1.39593	-12.5507	145.022	6.88394	18.81	18.81
C(=O)(C=COC)C	-44.4658	145.812		C(CCOC)(O)C	104.149	2	4	3.84065	-38.9206	146.078	7.15754	22.48	22.48
C(N=C(N(C)C)C)(C)(C)C	-20.5358	153.108		C(NC(N(C)C)C)(C)(C)C	144.262	1	2	1.38637	-13.8369	161.794	6.88847	-3.81	3.81
C(NOC=C)(C)(C)C	-76.5148	104.083		C(NOCC)(C)(C)C	117.192	1	2	1.7066	-69.6835	97.3245	7.92888	33.89	33.89
C(OC(=C)C)(C)(C)C	-101.485	112.401		C(OC(C)C)(C)(C)C	116.204	1	2	1.72111	-91.2688	95.6942	7.70272	33.9	33.9
C(=C)(OC(N(C)C)OC)C	-34.6269	173.963		C(OC(N(C)C)OC)(C)C	147.218	1	2	1.35853	-30.825	161.107	6.46746	32.6	32.6
C(OC(=O)C)(C)(C)C	-92.4114	102.499		C(OC(O)C)(C)(C)C	118.176	1	2	1.69239	-18.6909	145.646	6.46122	-4.5	4.5
C(OC)(CC(=C(C)C)O)(C)C	-39.681	210.764		C(OC)(CC(C(C)C)O)(C)C	160.257	1	2	1.248	-18.9781	195.912	6.87243	28.82	28.82
C(OC)(CC(=C(C)C)OC)(C)C	-71.2221	202.615		C(OC)(CC(C(C)C)OC)(C)C	174.284	1	2	1.14755	-53.036	173.091	6.2716	28.63	28.63
C(OC)(CC(=C(N)C)C)(C)C	-56.2863	190.03		C(OC)(CC(C(N)C)C)(C)C	159.273	1	2	1.25571	-68.3809	185.282	7.56949	16.18	16.18
C(OC)(CC(=C(O)C)C)(C)C	-34.9202	211.77		C(OC)(CC(C(O)C)C)(C)C	160.257	1	2	1.248	-28.3259	193.639	7.48652	29.54	29.54
C(OC)(C=C(COC)N)(C)C	-22.0992	198.292		C(OC)(CC(COC)N)(C)C	161.245	1	2	1.24035	-19.1634	179.655	6.73098	24.77	24.77
C(OC)(CC(=COC)N)(C)C	-19.6406	201.064		C(OC)(CC(COC)N)(C)C	161.245	1	2	1.24035	-19.1634	179.655	6.73098	25.78	25.78
C(OC)(CC(=N)COC)(C)C	-14.5538	178.3		C(OC)(CC(COC)N)(C)C	161.245	1	2	1.24035	-19.1634	179.655	6.73098	19.87	19.87
C(OC)(CC(=NOC)C)(C)C	-44.9917	166.501		C(OC)(CC(NOC)C)(C)C	161.245	1	2	1.24035	-11.63	162.999	6.86987	20.94	20.94
C(C=C)(OC)(C)C	-110.969	83.358		C(OC)(CC)(C)C	102.177	1	2	1.95739	-96.5054	77.8499	7.85534	31.65	31.65
C(=C)(OC)CN(N(C)C)C	-16.0333	182.393		C(OC)(CN(N(C)C)C)C	146.234	1	2	1.36767	-12.3702	183.36	6.90206	32.5	32.5
C(=CN(N(C)C)C)(OC)C	-15.8001	182.929		C(OC)(CN(N(C)C)C)C	146.234	1	2	1.36767	-12.3702	183.36	6.90206	24.78	24.78
C(OC)(C=NC)(COC)C	-44.7933	179.342		C(OC)(CNC)(COC)C	147.218	1	2	1.35853	-12.6031	162.498	6.81659	24.01	24.01
C(OC)(COC)(CN=C)C	-44.8057	180.062		C(OC)(CNC)(COC)C	147.218	1	2	1.35853	-12.6031	162.498	6.81659	22.72	22.72
C(C=O)(OC)(C)C	-50.4384	141.451		C(OC)(CO)(C)C	104.149	1	2	1.92033	-32.8143	142.679	7.88602	18.74	18.74
C(C=C)(OC)(OC)C	-76.413	107.906		C(OC)(OC)(CC)C	118.176	1	2	1.69239	-79.5731	105.491	7.67693	31.51	31.51
C(OC)(OC)(CN=C)C	-39.3247	185.023		C(OC)(OC)(CNC)C	133.191	1	2	1.5016	-12.2655	145.412	7.82167	23.32	23.32
C(OC)(OC)(C=NC)C	-39.282	185.608		C(OC)(OC)(CNC)C	133.191	1	2	1.5016	-12.2655	145.412	7.82167	25.47	25.47
C(=C(C=N)C)(C)C	-14.9585	108.174		C(C(CN)C)(C)C	101.193	2	4	3.95284	-45.2747	111.358	7.02776	21.58	21.58
C(OC)(OC=C)(C)C	-76.4599	107.924		C(OC)(OCC)(C)C	118.176	1	2	1.69239	-79.8766	105.491	7.72161	35.47	35.47
C(OC1=C(CN(C1)C)O)(C)(C)C	-29.6143	267.617		C(OC1C(CN(C1)C)O)(C)(C)C	173.256	1	2	1.15436	-13.1542	234.193	7.43475	33.66	33.66
C(OCC(=C(C)C)C)(C)(C)C	-79.3879	189.646		C(OCC(C(C)C)C)(C)(C)C	158.285	1	2	1.26354	-86.083	171.841	6.03181	23.57	23.57
C(OCC(=C(C)C)N)(C)(C)C	-56.0529	185.942		C(OCC(C(C)C)N)(C)(C)C	159.273	1	2	1.25571	-68.1221	185.778	6.84136	18.85	18.85
C(OCC(=C(C)C)O)(C)(C)C	-34.505	211.802		C(OCC(C(C)C)O)(C)(C)C	160.257	1	2	1.248	-25.834	194.109	6.64457	28.18	28.18
C(OCC(=C(O)C)C)(C)(C)C	-33.8518	214.526		C(OCC(C(O)C)C)(C)(C)C	160.257	1	2	1.248	-44.1193	193.661	7.37532	28.75	28.75
C(OCC(=C(OC)C)C)(C)(C)C	-71.151	202.615		C(OCC(C(OC)C)C)(C)(C)C	174.284	1	2	1.14755	-53.1537	173.091	7.2129	28.45	28.45
C(OC=C(COC)N)(C)(C)C	-19.87	198.291		C(OCC(COC)N)(C)(C)C	161.245	1	2	1.24035	-20.9165	179.57	6.47733	28.52	28.52
C(OCC(=N)COC)(C)(C)C	-12.6158	178.296		C(OCC(COC)N)(C)(C)C	161.245	1	2	1.24035	-20.9165	179.57	6.47733	22.14	22.14
C(OCC(=COC)N)(C)(C)C	-19.87	198.291		C(OCC(COC)N)(C)(C)C	161.245	1	2	1.24035	-20.9165	179.57	6.47733	25.7	25.7
C(OCC(=C)O)(C)(C)C	-28.5737	181.998		C(OCC(O)C)(C)(C)C	132.203	1	2	1.51282	-40.9388	168.579	6.63263	33.62	33.62
C(OC=C(O)C)(C)(C)C	-25.0313	168.243		C(OCC(O)C)(C)(C)C	132.203	1	2	1.51282	-40.9388	168.579	6.63263	38.22	38.22
C(OCC(=O)C)(C)(C)C	-61.7787	157.815		C(OCC(O)C)(C)(C)C	132.203	1	2	1.51282	-40.9388	168.579	6.63263	15.98	15.98
C(OC=C)(C)(C)C	-111.059	80.2192		C(OCC)(C)(C)C	102.177	1	2	1.95739	-95.9318	77.8499	7.75627	35.33	35.33
C(=C(COC=C)O)(C)C	-45.5538	172.313		C(C(COCC)O)(C)C	132.203	2	4	3.02565	-39.7107	169.608	6.89427	32.06	32.06
C(ONC(=C(C)C)C)(C)(C)C	-67.7704	174.7		C(ONC(C(C)C)C)(C)(C)C	159.273	1	2	1.25571	-71.2082	156.217	6.76862	19.89	19.89
C(ONC(=C)C)(C)(C)C	-32.6059	131.706		C(ONC(C)C)(C)(C)C	131.219	1	2	1.52417	-69.5283	127.78	7.83978	23.21	23.21
C(ON=C(COC)C)(C)(C)C	-45.0097	166.541		C(ONC(COC)C)(C)(C)C	161.245	1	2	1.24035	-12.1691	155.759	6.77421	22.04	22.04
C(=C(C=O)C)(C)C	-63.5776	133.936		C(C(CO)C)(C)C	102.177	2	4	3.91478	-40.1068	135.386	6.96207	19.24	19.24
C(OOC(C=N)(C)C)(C)(C)C	-11.0283	165.901		C(OOC(CN)(C)C)(C)(C)C	161.245	1	2	1.24035	-20.0841	177.53	7.62417	22.92	22.92
C(OOC=C)(C)(C)C	-72.0863	107.946		C(OOCC)(C)(C)C	118.176	1	2	1.69239	-64.7843	112.413	7.62891	33.89	33.89
C(=NC)(CN(C(=C)C)C)C	-19.7586	179.065		C(NC)(CN(C(C)C)C)C	144.262	2	4	2.77273	-47.8012	162.773	6.99621	23.59	23.59
C(=C)(C=C(N(C)C)C)C	-64.7399	172.529		C(CC(N(C)C)C)(C)C	129.247	2	4	3.09485	-72.8832	139.416	6.95331	21.24	21.24
C(=CC(=C)N(C)C)(C)C	-64.7399	172.529		C(CC(N(C)C)C)(C)C	129.247	2	4	3.09485	-72.8832	139.416	6.95331	23.01	23.01
C(=C)(CC(=C)N(C)C)C	-72.3567	174.385		C(CC(N(C)C)C)(C)C	129.247	2	4	3.09485	-72.8832	139.416	6.95331	26.27	26.27
C(=NC=C)(C)C	-11.913	124.894		C(NCC)(C)C	87.166	2	4	4.58895	-66.7758	76.5399	4.95476	23.62	23.62
C(=CC(=COC)C)(COC)N	-16.6184	202.865		C(COC)(CC(COC)N)C	161.245	2	4	2.4807	-19.0574	196.424	7.41506	25.71	25.71
C(=C)(C=C(COC)N)COC	-17.6346	202.948		C(COC)(CC(COC)N)C	161.245	2	4	2.4807	-19.0574	196.424	7.41506	24.35	24.35
C(=N)(COC)CC(=COC)C	-12.5487	200.242		C(COC)(CC(COC)N)C	161.245	2	4	2.4807	-19.0574	196.424	7.41506	26.02	26.02
C(=N)(COC)C=C(COC)C	-11.7635	200.258		C(COC)(CC(COC)N)C	161.245	2	4	2.4807	-19.0574	196.424	7.41506	21.8	21.8
C(=C)(COC)CC(=COC)N	-15.8816	202.037		C(COC)(CC(COC)N)C	161.245	2	4	2.4807	-19.0574	196.424	7.41506	27.99	27.99
C(=C)(COC)CC(=N)COC	-12.8465	200.661		C(COC)(CC(COC)N)C	161.245	2	4	2.4807	-19.0574	196.424	7.41506	25.37	25.37
C(=N)(COC)C=C(OC)C	-10.0847	184.032		C(COC)(CC(OC)C)N	147.218	2	4	2.71706	-22.4973	170.892	7.4652	24.35	24.35
C(=N)(COC)CC(=C)OC	-11.2427	183.48		C(COC)(CC(OC)C)N	147.218	2	4	2.71706	-22.4973	170.892	7.4652	27.29	27.29
C(=C)(CC(=N)C)C	-25.2921	107.815		C(CC(N)C)(C)C	101.193	2	4	3.95284	-63.9537	111.152	7.24642	24.22	24.22
C(=CC(=C)C)(N)C	-39.157	124.519		C(CC(N)C)(C)C	101.193	2	4	3.95284	-63.9537	111.152	7.24642	24.23	24.23
C(=CC(=N)C)(C)C	-25.6272	108.148		C(CC(N)C)(C)C	101.193	2	4	3.95284	-63.9537	111.152	7.24642	21.33	21.33
C(=C)(CC(=C)N)C	-39.3136	118.947		C(CC(N)C)(C)C	101.193	2	4	3.95284	-63.9537	111.152	7.24642	26.66	26.66
C(=CC(=C)N)(C)C	-48.1496	124.519		C(CC(N)C)(C)C	101.193	2	4	3.95284	-63.9537	111.152	7.24642	23.75	23.75
C(=C)(CC(=NC)C)C	-38.7387	155.816		C(CC(NC)C)(C)C	115.22	2	4	3.47162	-67.3741	125.87	7.26679	25.37	25.37
C(=CC(=NC)C)(C)C	-39.0822	167.676		C(CC(NC)C)(C)C	115.22	2	4	3.47162	-67.3741	125.87	7.26679	22.46	22.46
C(=C(C(=C(C)C)C)O)(OC)C	-12.0033	228.018		C(C(C(C(OC)C)O)C)(C)C	160.257	2	4	2.49599	-34.0037	194.583	7.65182	26.86	26.86
C(=C(C(=C(OC)C)C)O)(C)C	-12.0339	228.027		C(C(C(C(OC)C)C)O)(C)C	160.257	2	4	2.49599	-34.2467	189.807	7.65182	26.55	26.55
C(=C)(OC)COC=C	-83.9435	123.093		C(OC)(COCC)C	118.176	2	4	3.38478	-83.3535	108.421	6.49611	33.71	33.71
C(=COC=C)(OC)C	-83.966	132.878		C(OC)(COCC)C	118.176	2	4	3.38478	-83.3535	108.421	6.49611	33.85	33.85
C(Cn1cccc1)(C)(C)C	-52.0565	183.726		C(CN1CCCC1)(C)(C)C	141.258	2	4	2.8317	-28.0052	159.489	7.86845	13.61	13.61
C(=C1CC(=C(C1)C)C)(C)C	-115.724	180.381		C(C1CC(C(C1)C)C)(C)C	140.27	2	4	2.85164	-103.026	160.867	7.36325	21.88	21.88
C(=C)(OCC(=C(O)C)C)C	-19.6916	170.503		C(OCC(C(O)C)C)(C)C	146.23	2	4	2.73542	-32.1654	188.51	7.37213	31.1	31.1
C(=C(OO)C)(C=C)C	-18.0418	175.958		C(C(OO)C)(CC)C	118.176	2	4	3.38478	-33.3848	156.079	7.52573	28.86	28.86
C(=CN1CC(=C(OC)C1)OC)(C)C	-45.5264	234.301		C(CN1CC(C(OC)C1)OC)(C)C	187.283	2	4	2.13581	-45.9317	205.917	7.27076	23.7	23.7
C(=C)(CN1CC(=C(OC)C1)OC)C	-45.5391	225.591		C(CN1CC(C(OC)C1)OC)(C)C	187.283	2	4	2.13581	-45.9317	205.917	7.27076	27.33	27.33
C(=O)(C(=C(C)C)OC)C	-15.1782	175.72		C(C(C(O)C)OC)(C)C	132.203	2	4	3.02565	-40.262	168.407	7.44625	20.86	20.86
C(=C)(C(=C(O)C)OC)C	-15.9913	177.557		C(C(C(O)C)OC)(C)C	132.203	2	4	3.02565	-40.262	168.407	7.44625	30.26	30.26
C(=C)(C(C(=O)C)OC)C	-16.1735	165.32		C(C(C(O)C)OC)(C)C	132.203	2	4	3.02565	-40.262	168.407	7.44625	22.4	22.4
C(=C)(C(C(=C)O)OC)C	-18.0939	163.171		C(C(C(O)C)OC)(C)C	132.203	2	4	3.02565	-40.262	168.407	7.44625	31.68	31.68
C(=N)(C(=C(OC)C)C)C	-33.4485	153.265		C(C(C(OC)C)C)(N)C	131.219	2	4	3.04834	-68.0943	162.346	7.86639	23.28	23.28
C(=O)(C(=C(OC)C)C)C	-15.161	175.72		C(C(C(OC)C)C)(O)C	132.203	2	4	3.02565	-39.6633	168.393	7.70936	20.02	20.02
C(=C)(C(=C(OC)C)O)C	-26.3118	177.373		C(C(C(OC)C)O)(C)C	132.203	2	4	3.02565	-46.8634	168.159	7.44625	29.98	29.98
C(=C(C(=C)OC)O)(C)C	-26.9791	171.862		C(C(C(OC)C)O)(C)C	132.203	2	4	3.02565	-46.8634	168.159	7.44625	29.02	29.02
C(=COC)(OC=C)C	-83.966	132.878		C(OCC)(COC)C	118.176	2	4	3.38478	-83.3535	108.421	6.49611	34.04	34.04
C(=C)(OC=C)COC	-83.9435	123.093		C(OCC)(COC)C	118.176	2	4	3.38478	-83.3535	108.421	6.49611	33.9	33.9
C(=COC)(C(=C(O)C)C)C	-28.312	167.395		C(C(C(COC)C)C)(O)C	146.23	2	4	2.73542	-46.7329	188.405	7.74641	29.67	29.67
C(=C)(C(=C(O)C)C)COC	-29.0736	175.624		C(C(C(COC)C)C)(O)C	146.23	2	4	2.73542	-46.7329	188.405	7.74641	28.49	28.49
C(=COC)(C(=C(C)C)C)O	-28.3269	167.002		C(C(C(COC)O)C)(C)C	146.23	2	4	2.73542	-44.8628	177.293	7.43654	28.63	28.63
C(=O)(C(=C(COC)C)C)C	-48.7016	179.826		C(C(C(COC)C)C)(O)C	146.23	2	4	2.73542	-46.7329	188.405	7.74641	17.89	17.89
C(=C)(C(=C(COC)C)C)O	-19.6126	170.501		C(C(C(COC)C)C)(O)C	146.23	2	4	2.73542	-46.7329	188.405	7.74641	27.77	27.77
C(=O)(C(=C(C)C)C)COC	-48.7238	179.826		C(C(C(COC)O)C)(C)C	146.23	2	4	2.73542	-44.8628	177.293	7.43654	18.16	18.16
C(=C)(C(=C(COC)O)C)C	-17.1473	199.163		C(C(C(COC)O)C)(C)C	146.23	2	4	2.73542	-44.8628	177.293	7.43654	28.41	28.41
C(C=N)(OC=C(OC)C)(C)C	-10.382	191.716		C(CN)(OCC(OC)C)(C)C	161.245	2	4	2.4807	-21.012	187.958	6.83066	30.02	30.02
C(C=N)(OCC(=C)OC)(C)C	-10.7645	191.704		C(CN)(OCC(OC)C)(C)C	161.245	2	4	2.4807	-21.012	187.958	6.83066	28.34	28.34
C(C=C)(C(=C(O)C)C)(C)C	-53.2603	184.492		C(C(C(O)C)C)(CC)(C)C	144.258	2	4	2.77281	-37.1579	175.648	7.55081	31.06	31.06
C(=O)(C(=C(C)C)C)C	-65.3409	154.895		C(C(C(O)C)C)(C)C	116.204	2	4	3.44222	-49.5309	135.686	7.44833	17.4	17.4
C(=C(OC)COC=C)(C)C	-74.6969	171.156		C(C(OC)COCC)(C)C	146.23	2	4	2.73542	-79.0767	142.393	6.52245	32.12	32.12
C(=C)(OC(C=N)(COC)C)C	-11.0305	191.728		C(CN)(COC)(OC(C)C)C	161.245	2	4	2.4807	-21.0268	179.766	6.83066	29.07	29.07
C(=C(CC(=C(C)C)C)O)(C)C	-15.756	215.953		C(C(CC(C(C)C)C)O)(C)C	158.285	2	4	2.52709	-37.871	203.54	7.32292	26.03	26.03
C(=C(CC(=C(O)C)C)C)(C)C	-13.1704	216.563		C(C(CC(C(O)C)C)C)(C)C	158.285	2	4	2.52709	-49.7832	204.291	7.67241	26.5	26.5
C(C(=CC(=C)C)O)(C)(C)C	-48.1573	189.902		C(C(CC(C)C)O)(C)(C)C	144.258	2	4	2.77281	-36.9446	175.372	6.86488	26.34	26.34
C(=CC(=O)C(C)(C)C)(C)C	-12.62	177.004		C(C(CC(C)C)O)(C)(C)C	144.258	2	4	2.77281	-36.9446	175.372	6.86488	17.93	17.93
C(C(=O)CC(=C)C)(C)(C)C	-28.155	174.912		C(C(CC(C)C)O)(C)(C)C	144.258	2	4	2.77281	-36.9446	175.372	6.86488	21.07	21.07
C(C=N)(C=C(OC)C)(C)C	-44.8217	157.069		C(CN)(CC(OC)C)(C)C	145.246	2	4	2.75395	-72.0348	178.457	7.12768	27	27
C(C=N)(CC(=C)OC)(C)C	-44.6964	159.884		C(CN)(CC(OC)C)(C)C	145.246	2	4	2.75395	-72.0348	178.457	7.12768	27.98	27.98
C(C(=CC(=C)C)OC)(C)(C)C	-89.4811	178.877		C(C(OC)CC(C)C)(C)(C)C	158.285	2	4	2.52709	-86.0867	171.841	6.66855	26.18	26.18
C(=CC(=C(C)C)O)(OC)C	-28.268	167.036		C(C(CC(OC)C)O)(C)C	146.23	2	4	2.73542	-31.6352	186.901	7.49419	27.23	27.23
C(=C)(OC)CC(=C(C)C)O	-17.0328	178.433		C(C(CC(OC)C)O)(C)C	146.23	2	4	2.73542	-31.6352	186.901	7.49419	30.43	30.43
C(=C(C=C)C)(C)C	-76.501	95		C(C(CC)C)(C)C	100.205	2	4	3.99182	-118.663	83.829	6.49896	25.8	25.8
C(=C(OC)CC(=C(C)C)O)(C)C	-10.6967	232.786		C(C(OC)CC(C(C)C)O)(C)C	174.284	2	4	2.2951	-34.3001	214.674	7.30863	27.92	27.92
C(=C(C=C)C)(COC)C	-82.6253	139.905		C(C(CC)C)(COC)C	130.231	2	4	3.07147	-90.5154	128.951	7.45227	25.87	25.87
C(=C(N)C)(C=C)C	-39.1701	124.539		C(C(CC)C)(N)C	101.193	2	4	3.95284	-60.0365	111.22	7.72091	24.16	24.16
C(=C(O)C)(COC=C)C	-16.1205	177.972		C(C(O)C)(COCC)C	132.203	2	4	3.02565	-24.9758	169.954	7.5062	31.84	31.84
C(=C)(ONC(=C(C)C)C)C	-40.8842	159.849		C(ONC(C(C)C)C)(C)C	145.246	2	4	2.75395	-71.1433	144.692	6.98303	26.18	26.18
C(=C(OC)C)(C=C)C	-82.0768	125.721		C(C(OC)C)(CC)C	116.204	2	4	3.44222	-92.6433	102.887	7.53713	28.78	28.78
C(=CC(C(=O)C)(C)C)(C)C	-12.7554	178.925		C(C(O)C)(CC(C)C)(C)C	144.258	2	4	2.77281	-28.1526	175.637	6.97505	19.82	19.82
C(C(=C)O)(C=C(C)C)(C)C	-53.2458	184.492		C(C(O)C)(CC(C)C)(C)C	144.258	2	4	2.77281	-28.1526	175.637	6.97505	30.33	30.33
C(C(=O)C)(CC(=C)C)(C)C	-34.3209	174.912		C(C(O)C)(CC(C)C)(C)C	144.258	2	4	2.77281	-28.1526	175.637	6.97505	20.69	20.69
C(C(=C)O)(CC(=C)C)(C)C	-53.5582	184.273		C(C(O)C)(CC(C)C)(C)C	144.258	2	4	2.77281	-28.1526	175.637	6.97505	32.17	32.17
C(=C(O)C)(C=C)COC	-16.664	177.914		C(C(O)C)(CC)COC	132.203	2	4	3.02565	-22.6014	169.433	7.60886	28.77	28.77
C(=C)(N(NC(=C(C)C)C)C)C	-42.812	213.926		C(C(NN(C(C)C)C)C)(C)C	158.289	2	4	2.52702	-67.4737	177.323	6.94518	21.5	21.5
C(=C(OC)COC)(C=C)C	-74.695	171.114		C(C(OC)COC)(CC)C	146.23	2	4	2.73542	-79.1655	142.393	7.32179	28.85	28.85
C(=C(N=C)C)(C)C	-16.8362	125.277		C(C(NC)C)(C)C	101.193	2	4	3.95284	-68.134	95.5783	7.24642	23.05	23.05
C(=C)(C(=NC)C)C	-16.8362	125.285		C(C(NC)C)(C)C	101.193	2	4	3.95284	-68.134	95.5783	7.24642	24.41	24.41
C(=C)(C(=N)C)C	-37.1657	95.071		C(C(N)C)(C)C	87.166	2	4	4.58895	-62.0808	84.3563	7.23298	23.47	23.47
C(=C)(C(=C)N)C	-61.2742	104.413		C(C(N)C)(C)C	87.166	2	4	4.58895	-62.0808	84.3563	7.23298	26.54	26.54
C(Cc1occc1)(C)(C)C	-97.4234	168.38		C(CC1OCCC1)(C)(C)C	142.242	2	4	2.81211	-19.4249	174.398	6.89263	17.48	17.48
C(=C)(C(=COC=C)C=C)C	-57.1918	174.34		C(C(CC)COCC)(C)C	144.258	4	8	5.54562	-85.5778	169.807	6.76182	31.33	31.33
C(=C)(C(=COC=C)C=C)O	-12.5338	214.995		C(C(CC)COCC)(O)C	146.23	4	8	5.47083	-36.8203	190.712	7.54622	32.07	32.07
C(C=C1C=COC1)(C)(C)C	-14.4802	192.54		C(CC1CCOC1)(C)(C)C	142.242	2	4	2.81211	-19.4625	174.398	6.89263	25.77	25.77
C(Cc1ccoc1)(C)(C)C	-97.4282	167.349		C(CC1CCOC1)(C)(C)C	142.242	2	4	2.81211	-19.4625	174.398	6.89263	17.48	17.48
C(=C(C=C)C=NC=C)(C)C	-51.9325	175.179		C(C(CC)CNCC)(C)C	143.274	4	8	5.58371	-54.2677	155.756	7.09507	24.43	24.43
C(=C)(C=C)OC=C	-65.2943	85.8039		C(CC)(OCC)C	102.177	3	6	5.87216	-105.915	85.1285	6.98804	32.28	32.28
C(=COC)(C=C)OC=C	-85.6761	140.178		C(CC)(OCC)COC	132.203	3	6	4.53847	-84.0433	126.63	6.66034	32.76	32.76
C(=CC1=C(N(C=CO1)C)C)(C)C	-34.6443	212.212		C(CC1C(N(CCO1)C)C)(C)C	171.284	3	6	3.50295	-30.3423	184.44	7.6551	23.41	23.41
C(=C)(CC1=C(N(C=CO1)C)C)C	-35.4722	212.118		C(CC1C(N(CCO1)C)C)(C)C	171.284	3	6	3.50295	-30.3423	184.44	7.6551	26.32	26.32
C(=Cc1ccc(o1)C)(C)C	-87.3429	174.506		C(CC1CCC(O1)C)(C)C	142.242	3	6	4.21816	-18.8033	174.382	7.49347	21.52	21.52
C(=C(C=C)C=N)(C=C)C	-15.258	178.686		C(C(CC)CN)(CC)C	129.247	4	8	6.1897	-30.1108	159.891	7.5279	24.5	24.5
C(=C(C=C)C=NC)(C=C)C	-51.9037	176.753		C(C(CC)CNC)(CC)C	143.274	4	8	5.58371	-61.4129	158.221	7.56673	24.98	24.98
C(=C(C=C)CN=C)(C=C)C	-51.8755	176.483		C(C(CC)CNC)(CC)C	143.274	4	8	5.58371	-61.4129	158.221	7.56673	26.2	26.2
C(=NC=C)(CN(C)C)C	-19.9219	172.9		N(CC(NCC)C)(C)C	130.235	2	4	3.07137	-47.6971	148.957	7.1214	23.64	23.64
C(=CN(C)C)(N=C)C	-20.7071	184.982		N(CC(NC)C)(C)C	116.208	2	4	3.4421	-20.2663	133.997	7.16664	21.51	21.51
C(=C)(N=C)CN(C)C	-20.1795	162.074		N(CC(NC)C)(C)C	116.208	2	4	3.4421	-20.2663	133.997	7.16664	24.2	24.2
C(COC)(NC(=C)C=C)(C)C	-73.3916	180.539		C(COC)(NC(CC)C)(C)C	159.273	2	4	2.51141	-51.4103	177.658	7.17183	28.28	28.28
C(=C)(CC(=C)O)C	-37.3142	140.532		C(CC(O)C)(C)C	102.177	2	4	3.91478	-70.1576	130.94	7.19398	31.03	31.03
C(=CC(=C)O)(C)C	-29.0472	148.741		C(CC(O)C)(C)C	102.177	2	4	3.91478	-70.1576	130.94	7.19398	27.85	27.85
C(=C)(CC(=O)C)C	-67.5376	125.235		C(CC(O)C)(C)C	102.177	2	4	3.91478	-70.1576	130.94	7.19398	21.02	21.02
C(=CC(=O)C)(C)C	-63.4934	133.936		C(CC(O)C)(C)C	102.177	2	4	3.91478	-70.1576	130.94	7.19398	18.44	18.44
C(=C)(CC(=C)OC)C	-84.5614	127.685		C(CC(OC)C)(C)C	116.204	2	4	3.44222	-92.6442	102.887	6.93893	30.86	30.86
C(=CC(=C)OC)(C)C	-82.0684	125.721		C(CC(OC)C)(C)C	116.204	2	4	3.44222	-92.6442	102.887	6.93893	27.55	27.55
C(=C)(C=C(OC)C)C	-82.0684	125.721		C(CC(OC)C)(C)C	116.204	2	4	3.44222	-92.6442	102.887	6.93893	28.62	28.62
C(COc1ccoc1)(C)(C)C	-63.4308	191.202		C(COC1CCOC1)(C)(C)C	158.241	2	4	2.52779	-70.9617	187.679	6.82252	19.72	19.72
C(=C)(C=C(OC)OC)C	-87.6922	151.112		C(CC(OC)OC)(C)C	132.203	2	4	3.02565	-79.946	119.661	7.72615	31.65	31.65
C(=C)(C=C)C(OC)OC	-75.9088	135.984		C(CC)(C(OC)OC)C	132.203	2	4	3.02565	-79.9347	119.661	6.31223	29.84	29.84
C(=C(OC)OC)(C=C)C	-87.6918	151.112		C(CC)(C(OC)OC)C	132.203	2	4	3.02565	-79.9347	119.661	6.31223	31.76	31.76
C(=C)C(=NC)C	-12.0905	124.903		C(NC)(CC)C	87.166	2	4	4.58895	-67.0394	79.5104	7.41452	25.32	25.32
C(=CC(=C)OO)(C)C	-17.401	176.075		C(CC(OO)C)(C)C	118.176	2	4	3.38478	-28.8462	156.182	6.92439	27.85	27.85
C(=CC(=C)C)(OO)C	-17.6178	176.032		C(CC(OO)C)(C)C	118.176	2	4	3.38478	-28.8462	156.182	6.92439	28.77	28.77
C(=C)(CC(=C)OO)C	-17.6099	165.446		C(CC(OO)C)(C)C	118.176	2	4	3.38478	-28.8462	156.182	6.92439	31.03	31.03
C(=C)(COC=C(COC)N)C	-15.4444	200.625		C(COCC(COC)N)(C)C	161.245	2	4	2.4807	-21.5966	196.642	6.73608	27.28	27.28
C(=COCC(=N)COC)(C)C	-10.9273	200.243		C(COCC(COC)N)(C)C	161.245	2	4	2.4807	-21.5966	196.642	6.73608	26.78	26.78
C(=C)(COCC(=COC)N)C	-15.4444	200.625		C(COCC(COC)N)(C)C	161.245	2	4	2.4807	-21.5966	196.642	6.73608	26.63	26.63
C(=C)(COCC(=N)COC)C	-11.3215	200.663		C(COCC(COC)N)(C)C	161.245	2	4	2.4807	-21.5966	196.642	6.73608	25.09	25.09
C(=CC(COC=C)(O)C)(C)C	-38.0538	212.353		C(COCC)(CC(C)C)(O)C	160.257	2	4	2.49599	-34.2189	205.268	6.87243	30.53	30.53
C(=C)(CC(COC=C)(O)C)C	-16.1987	213.979		C(COCC)(CC(C)C)(O)C	160.257	2	4	2.49599	-34.2189	205.268	6.87243	31.85	31.85
C(=CC(C=C)(O)C)(C)C	-76.0788	165.68		C(CC)(CC(C)C)(O)C	130.231	2	4	3.07147	-40.0128	156.447	6.98607	28.57	28.57
C(=CC(C=C)(N)C)(C)C	-17.0514	169.633		C(CC)(CC(C)C)(N)C	129.247	2	4	3.09485	-38.9342	151.927	7.13117	29.68	29.68
C(=C)(CC(C=C)(N)C)C	-18.5069	164.389		C(CC)(CC(C)C)(N)C	129.247	2	4	3.09485	-38.9342	151.927	7.13117	31.06	31.06
C(=C)(CC(C=C)(O)C)C	-70.2586	159.986		C(CC)(CC(C)C)(O)C	130.231	2	4	3.07147	-40.0128	156.447	6.98607	30.21	30.21
C(=C)(NC(=C)COC)C	-15.1875	162.475		C(NC(COC)C)(C)C	131.219	2	4	3.04834	-67.4327	145.878	6.96894	24.87	24.87
C(=NC(=C)C)(C)C	-16.6915	125.297		C(NC(C)C)(C)C	101.193	2	4	3.95284	-63.9756	91.6308	7.79446	22.59	22.59
C(=C)(NC(=C)C)C	-71.7745	120.564		C(NC(C)C)(C)C	101.193	2	4	3.95284	-63.9756	91.6308	7.79446	24.29	24.29
C(COC=C1C=COC1)(C)(C)C	-38.5627	224.795		C(COCC1CCOC1)(C)(C)C	172.268	2	4	2.32196	-62.2047	199.057	6.87244	31.84	31.84
C(COCc1ccoc1)(C)(C)C	-61.0498	192.262		C(COCC1CCOC1)(C)(C)C	172.268	2	4	2.32196	-62.2047	199.057	6.87244	18.02	18.02
C(=C)(OOC=C(C)C)C	-85.7195	151.262		C(COOC(C)C)(C)C	132.203	2	4	3.02565	-69.735	119.618	7.72778	31.68	31.68
C(COC=CC(=C)C)(N)(C)C	-56.2399	198.666		C(COCCC(C)C)(N)(C)C	159.273	2	4	2.51141	-68.1745	198.547	7.9598	31.02	31.02
C(=CN(C(C)(C)C)C=C)(C)C	-45.5218	174.172		C(N(CC)CC(C)C)(C)(C)C	157.301	2	4	2.5429	-44.5984	171.437	7.84176	24.17	24.17
C(N(C=C)CC(=C)C)(C)(C)C	-45.034	173.093		C(N(CC)CC(C)C)(C)(C)C	157.301	2	4	2.5429	-44.5984	171.437	7.84176	28.59	28.59
C(=COCOCC(=NC)C)(N)C	-17.6115	248.61		C(COCOCC(NC)C)(N)C	176.26	2	4	2.26937	-16.3025	216.005	7.33605	25.1	25.1
C(=C)(COCOCC(=NC)C)N	-18.5474	220.575		C(COCOCC(NC)C)(N)C	176.26	2	4	2.26937	-16.3025	216.005	7.33605	23.44	23.44
C(=COCOC=C)(C)C	-87.6916	151.282		C(COCOCC)(C)C	132.203	2	4	3.02565	-84.2511	126.236	7.72615	34.22	34.22
C(=C)(COCOC=C)C	-86.3857	144.336		C(COCOCC)(C)C	132.203	2	4	3.02565	-84.2511	126.236	7.72615	31.95	31.95
C(=COC)(CC(=C(O)C)C)C	-27.8376	210.942		C(COC)(CC(C(O)C)C)C	160.257	2	4	2.49599	-45.0232	198.284	7.78027	30.43	30.43
C(=CC(=C(O)C)C)(COC)C	-27.8873	227.698		C(COC)(CC(C(O)C)C)C	160.257	2	4	2.49599	-45.0232	198.284	7.78027	25.75	25.75
C(=C)(COC)CC(=C(O)C)C	-28.438	226.852		C(COC)(CC(C(O)C)C)C	160.257	2	4	2.49599	-45.0232	198.284	7.78027	29.13	29.13
C(CON(C=C)C=C)(O)(C)C	-12.1906	209.255		C(CON(CC)CC)(O)(C)C	161.245	2	4	2.4807	-11.7764	202.275	7.84044	24.71	24.71
C(=CONC(=C(C)C)C)(C)C	-50.3296	176.396		C(CONC(C(C)C)C)(C)C	159.273	2	4	2.51141	-71.2592	157.075	6.86799	25.4	25.4
C(=C)(CONC(=C(C)C)C)C	-56.1542	175.946		C(CONC(C(C)C)C)(C)C	159.273	2	4	2.51141	-71.2592	157.075	6.86799	23.96	23.96
C(=COC=COC)(C)C	-87.5668	155.631		C(COCCOC)(C)C	132.203	2	4	3.02565	-84.11	126.544	7.72615	33.17	33.17
C(=C)(COC=COC)C	-87.6843	155.38		C(COCCOC)(C)C	132.203	2	4	3.02565	-84.11	126.544	7.72615	32.13	32.13
C(=C)(COOC(=C)C)C	-87.2148	136.638		C(COOC(C)C)(C)C	132.203	2	4	3.02565	-69.735	119.618	7.72778	30.24	30.24
C(=COC=C(C)C)(C)C	-81.5706	140.139		C(COCC(C)C)(C)C	130.231	2	4	3.07147	-89.6027	128.951	7.63692	31.17	31.17
C(=C)(COC=C(C)C)C	-82.5718	140.297		C(COCC(C)C)(C)C	130.231	2	4	3.07147	-89.6027	128.951	7.63692	30.13	30.13
C(=C)(COCC(=C)C)C	-84.2491	142.981		C(COCC(C)C)(C)C	130.231	2	4	3.07147	-89.6027	128.951	7.63692	28.46	28.46
C(=COC=C)(C)C	-66.2468	100.288		C(COCC)(C)C	102.177	2	4	3.91478	-105.934	85.2707	7.85425	32.65	32.65
C(=C)(COC=C)C	-62.4593	98.7688		C(COCC)(C)C	102.177	2	4	3.91478	-105.934	85.2707	7.85425	31.61	31.61
C(N(C(=C)C)C=C)(C)(C)C	-46.154	164.921		C(N(C(C)C)CC)(C)(C)C	143.274	2	4	2.79185	-48.0078	155.045	7.84281	27.46	27.46
C(=C)(N(C(=C)C)C)C	-105.859	158.894		C(N(C(C)C)C)(C)C	115.22	2	4	3.47162	-99.0866	104.54	7.7506	24.2	24.2
C(N(C(=C)C=C)C)(C)(C)C	-46.0154	164.935		C(N(C(CC)C)C)(C)(C)C	143.274	2	4	2.79185	-47.7701	155.116	6.92461	27.71	27.71
C(=C)(COC(=C)C)C	-84.3611	127.685		C(COC(C)C)(C)C	116.204	2	4	3.44222	-92.6937	102.887	7.84262	30.98	30.98
C(=COC(=C)C)(C)C	-81.8396	125.686		C(COC(C)C)(C)C	116.204	2	4	3.44222	-92.6937	102.887	7.84262	32.53	32.53
C(=C)(COC)CC(=C(N)C)C	-56.0577	202.491		C(COC)(CC(C(N)C)C)C	159.273	2	4	2.51141	-68.4847	201.012	7.84178	23.69	23.69
C(=C)(N(C(C=O)(C)C)C)C	-45.4237	192.761		C(N(C(C)C)C)(CO)(C)C	145.246	2	4	2.75395	-13.3037	183.409	7.99809	21.93	21.93
C(=COC)(CC(=C(N)C)C)C	-56.053	202.237		C(COC)(CC(C(N)C)C)C	159.273	2	4	2.51141	-68.4847	201.012	7.84178	24.99	24.99
C(=CC(=C(N)C)C)(COC)C	-55.9478	202.249		C(COC)(CC(C(N)C)C)C	159.273	2	4	2.51141	-68.4847	201.012	7.84178	20.98	20.98
C(N(C(=C)C=O)C)(C)(C)C	-45.4256	192.799		C(N(C(CO)C)C)(C)(C)C	145.246	2	4	2.75395	-16.6269	183.649	7.12028	22.19	22.19
C(=C)(C(N(C)C)(C=O)C)C	-45.4102	192.68		C(N(C)C)(C(C)C)(CO)C	145.246	2	4	2.75395	-11.869	182.718	7.12028	23.52	23.52
C(=C)(N(C(=C)OC)C)OC	-32.7468	185.333		C(N(C(OC)C)C)(OC)C	147.218	2	4	2.71706	-30.8161	161.276	6.94241	27.87	27.87
C(=C)(C=C)N(C(OC)OC)C	-36.5726	187.486		C(N(C(OC)OC)C)(CC)C	161.245	2	4	2.4807	-37.5883	174.12	6.63822	26.41	26.41
C(C(=O)C=C)(N(C)C)(C)C	-45.4085	192.346		C(N(C)C)(C(CC)O)(C)C	145.246	2	4	2.75395	-14.4068	181.474	7.12028	21.47	21.47
C(N(C)C)(C=NC(=C)C)(C)C	-20.1807	179.659		C(N(C)C)(CNC(C)C)(C)C	158.289	2	4	2.52702	-50.2969	193.934	7.94267	23.71	23.71
C(N(C)C)(C=C)(C=NC)C	-20.5688	175.262		C(N(C)C)(CC)(CNC)C	144.262	2	4	2.77273	-47.8541	163.081	7.16937	27.52	27.52
C(N(C)C)(C=C)(CN=C)C	-20.196	156.35		C(N(C)C)(CC)(CNC)C	144.262	2	4	2.77273	-47.8541	163.081	7.16937	27.94	27.94
C(N(C)C)(CN=C(C=C)C)(C)C	-19.0474	184.33		C(N(C)C)(CNC(CC)C)(C)C	172.316	2	4	2.32132	-54.7878	197.42	7.13015	24.32	24.32
C(N(C)C)(C=NC=C)(C)C	-20.5002	175.959		C(N(C)C)(CNCC)(C)C	144.262	2	4	2.77273	-47.8799	163.001	7.94968	24.19	24.19
C(N(c1c(coc1)O)C)(C)(C)C	-17.6457	267.893		C(N(C1C(COC1)O)C)(C)(C)C	173.256	2	4	2.30872	-12.6839	234.15	7.57799	19.87	19.87
C(=CN(C(C=N)(C)C)C)(C)C	-11.2157	214.865		C(N(CC(C)C)C)(CN)(C)C	158.289	2	4	2.52702	-24.1203	194.28	7.97645	21.41	21.41
C(=C)(CN(C(C=N)(C)C)C)C	-11.2967	214.258		C(N(CC(C)C)C)(CN)(C)C	158.289	2	4	2.52702	-24.1203	194.28	7.97645	25.76	25.76
C(=CN(C(C=O)(C)C)C)(C)C	-45.5808	202.056		C(N(CC(C)C)C)(CO)(C)C	159.273	2	4	2.51141	-17.2077	207.379	4.0853	20.08	20.08
C(=C)(CN(C(C=O)(C)C)C)C	-45.5565	201.434		C(N(CC(C)C)C)(CO)(C)C	159.273	2	4	2.51141	-17.2077	207.379	4.0853	23.09	23.09
C(N(CC(=N)C=C)C)(C)(C)C	-11.6745	215.252		C(N(CC(CC)N)C)(C)(C)C	158.289	2	4	2.52702	-23.7598	194.365	7.14542	25.25	25.25
C(N(C=C(N=C)C)C)(C)(C)C	-20.1881	179.61		C(N(CC(NC)C)C)(C)(C)C	158.289	2	4	2.52702	-47.9594	193.92	7.06671	22.21	22.21
C(N(CC(=C)N=C)C)(C)(C)C	-19.8891	179.597		C(N(CC(NC)C)C)(C)(C)C	158.289	2	4	2.52702	-47.9594	193.92	7.06671	24.12	24.12
C(=CC(C=O)(C)C)(C)C	-28.1056	161.003		C(CO)(CC(C)C)(C)C	130.231	2	4	3.07147	-48.5781	164.136	7.9526	21.7	21.7
C(N(C=C)C)(C=NC)(C)C	-20.5189	175.889		C(N(CC)C)(CNC)(C)C	144.262	2	4	2.77273	-47.8037	163.025	7.98519	25.49	25.49
C(=C)(CC(C=O)(C)C)C	-34.2395	154.351		C(CO)(CC(C)C)(C)C	130.231	2	4	3.07147	-48.5781	164.136	7.9526	22.38	22.38
C(N(C=C)C)(CN=C)(C)C	-20.1492	156.409		C(N(CC)C)(CNC)(C)C	144.262	2	4	2.77273	-47.8037	163.025	7.98519	26.48	26.48
C(=C)(N(C=C)C)C	-58.7495	145.223		C(N(CC)C)(C)C	101.193	2	4	3.95284	-125.584	83.1149	7.97252	24.4	24.4
C(N(C=CC(=O)C)C)(C)(C)C	-45.5801	202.033		C(N(CCC(O)C)C)(C)(C)C	159.273	2	4	2.51141	-17.2409	207.937	7.17162	16.47	16.47
C(=COC)(C=C)C	-67.24	100.313		C(CC)(COC)C	102.177	2	4	3.91478	-105.723	85.2707	7.09731	30.39	30.39
C(=C)(C=C)COC	-64.3967	98.0537		C(CC)(COC)C	102.177	2	4	3.91478	-105.723	85.2707	7.09731	29.43	29.43
C(=CN=C)(C)C	-12.0697	124.877		C(CNC)(C)C	87.166	2	4	4.58895	-70.5854	79.2797	5.64979	23.82	23.82
C(=C)(C=NC)C	-12.0697	124.905		C(CNC)(C)C	87.166	2	4	4.58895	-70.5854	79.2797	5.64979	25.07	25.07
C(=C)(CN=C)C	-11.4554	109.617		C(CNC)(C)C	87.166	2	4	4.58895	-70.5854	79.2797	5.64979	27.76	27.76
C(=C)(NOCC(C=C)(C)C)C	-56.316	174.948		C(CC)(CONC(C)C)(C)C	159.273	2	4	2.51141	-71.3104	157.309	7.94662	27.48	27.48
C(=C)(N(N(C=C)C)C)C	-41.7092	173.458		C(N(N(CC)C)C)(C)C	130.235	2	4	3.07137	-64.8105	165.973	7.90927	23.83	23.83
C(N(N=C(C=C)C)C)(C)(C)C	-10.9139	155.598		C(N(NC(CC)C)C)(C)(C)C	158.289	2	4	2.52702	-67.4735	177.435	7.12664	24.36	24.36
C(N(NC(=C)C=C)C)(C)(C)C	-43.328	215.919		C(N(NC(CC)C)C)(C)(C)C	158.289	2	4	2.52702	-67.4735	177.435	7.12664	26.86	26.86
C(=C)(CN=C(C)C)C	-38.589	145.068		C(CNC(C)C)(C)C	115.22	2	4	3.47162	-62.7197	124.416	7.98201	25.3	25.3
C(=CN=C(C)C)(C)C	-38.9231	167.55		C(CNC(C)C)(C)C	115.22	2	4	3.47162	-62.7197	124.416	7.98201	22.17	22.17
C(=C)(N=C(COC)COC)C	-44.8865	176.701		C(NC(COC)COC)(C)C	161.245	2	4	2.4807	-58.542	178.528	7.76424	24.31	24.31
C(n1c(cc(c1)C)C)(C)(C)C	-38.9881	194.988		C(N1C(CC(C1)C)C)(C)(C)C	155.285	2	4	2.57591	-21.3103	168.486	7.62127	13.47	13.47
C(n1c(ccc1C)C)(C)(C)C	-38.9869	194.992		C(N1C(CCC1C)C)(C)(C)C	155.285	2	4	2.57591	-21.3092	168.165	7.33648	13.58	13.58
C(n1c(ccc1)C)(C)(C)C	-52.0391	183.764		C(N1C(CCC1)C)(C)(C)C	141.258	2	4	2.8317	-21.2383	158.925	7.13127	13.72	13.72
C(N1C(=C)N(C=C1)C)(C)(C)C	-17.3836	182.82		C(N1C(N(CC1)C)C)(C)(C)C	156.273	2	4	2.55962	-17.712	179.068	6.87771	21.32	21.32
C(=C)(N1CC(=C(OC)C1)OC)C	-45.1431	221.149		C(N1CC(C(OC)C1)OC)(C)C	173.256	2	4	2.30872	-45.7325	187.709	7.18044	26.35	26.35
C(n1ccc(c1)C)(C)(C)C	-52.0409	183.757		C(N1CCC(C1)C)(C)(C)C	141.258	2	4	2.8317	-21.2391	158.94	7.13127	13.84	13.84
C(n1cccc1)(C)(C)C	-61.7153	171.622		C(N1CCCC1)(C)(C)C	127.231	2	4	3.14389	-40.5407	151.227	7.86207	14.2	14.2
C(=COC)(C=COC)C	-87.5557	155.611		C(CCOC)(COC)C	132.203	2	4	3.02565	-83.6695	126.544	6.31223	31.5	31.5
C(=C)(C=COC)COC	-87.6728	151.257		C(CCOC)(COC)C	132.203	2	4	3.02565	-83.6695	126.544	6.31223	30.54	30.54
C(=C)(N1COC=COC1)C	-10.5675	213.358		C(N1COCCOC1)(C)C	145.202	2	4	2.75478	-40.4741	206.79	7.67585	29.37	29.37
C(N1C2=CN(C(=C1)C2)C)(C)(C)C	-16.3424	227.273		C(N2C1CC(N(C1)C)C2)(C)(C)C	168.284	2	4	2.37693	-14.0932	191.768	8.1606	18.14	18.14
C(NC(=C(C=C)C)C)(C)(C)C	-32.8094	180.011		C(NC(C(CC)C)C)(C)(C)C	157.301	2	4	2.5429	-15.2865	178.837	7.55148	22.77	22.77
C(=C)(C=COC)C	-67.1763	100.313		C(CCOC)(C)C	102.177	2	4	3.91478	-105.733	85.2707	7.94669	30.34	30.34
C(N=CC(=C)C)(C)(C)C	-22.6078	152.199		C(NCC(C)C)(C)(C)C	129.247	2	4	3.09485	-36.2188	142.49	7.92109	25.34	25.34
C(NN=C(C(=C)C)C)(C)(C)C	-15.4461	214.143		C(NNC(C(C)C)C)(C)(C)C	158.289	2	4	2.52702	-65.4288	162.865	6.83147	23.47	23.47
C(=NC(=COC)COC)(C)C	-44.9035	178.171		C(NC(COC)COC)(C)C	161.245	2	4	2.4807	-58.542	178.528	7.76424	22.92	22.92
C(=C)(N(N(C=C)C)C)OC	-15.4257	175.153		N(N(C(OC)C)C)(CC)C	146.234	2	4	2.73534	-12.3797	183.464	6.99852	25.81	25.81
C(OC=C)(OC(C=C)(C)C)(C)C	-70.4267	185.995		C(CC)(OC(OCC)(C)C)(C)C	174.284	2	4	2.2951	-53.118	173.065	7.73354	34.9	34.9
C(N=C)(C=C)(COC)COC	-44.7641	176.331		C(NC)(CC)(COC)COC	161.245	2	4	2.4807	-66.3422	178.877	7.86573	28.07	28.07
C(C=CC(OC)(C)C)(C=N)(C)C	-32.4158	181.006		C(CN)(CCC(OC)(C)C)(C)C	173.3	2	4	2.30814	-68.233	211.616	7.93577	26.33	26.33
C(=C)(NC(=COC)COC)C	-12.9316	200.287		C(NC(COC)COC)(C)C	161.245	2	4	2.4807	-58.542	178.528	7.76424	25.38	25.38
C(N=C(C(=C)C)C)(C)(C)C	-22.7123	164.056		C(NC(C(C)C)C)(C)(C)C	143.274	2	4	2.79185	-12.5507	145.022	6.88394	24.1	24.1
C(NC(=C)C(=C)C)(C)(C)C	-52.0526	166.876		C(NC(C(C)C)C)(C)(C)C	143.274	2	4	2.79185	-12.5507	145.022	6.88394	27.77	27.77
C(N=C(C=C)C)(C)(C)C	-22.6071	152.202		C(NC(CC)C)(C)(C)C	129.247	2	4	3.09485	-16.5355	142.517	7.03207	24.5	24.5
C(NC(=C)C=C)(C)(C)C	-67.4745	159.133		C(NC(CC)C)(C)(C)C	129.247	2	4	3.09485	-16.5355	142.517	7.03207	28.09	28.09
C(=COC)(C(=NOC)C)C	-38.915	188.947		C(C(NOC)C)(COC)C	147.218	2	4	2.71706	-10.9654	146.356	7.53642	25.27	25.27
C(=C)(C(=NOC)C)COC	-38.9862	189.71		C(C(NOC)C)(COC)C	147.218	2	4	2.71706	-10.9654	146.356	7.53642	24.61	24.61
C(=C)(C(=NOC)COC)C	-39.0131	189.727		C(C(NOC)COC)(C)C	147.218	2	4	2.71706	-10.9107	143.279	6.96645	24.95	24.95
C(=C(C=O)COC)(C)C	-14.8887	175.718		C(C(CO)COC)(C)C	132.203	2	4	3.02565	-41.4535	171.569	6.89427	19.45	19.45
C(=C)(c1c(c(co1)C)C)C=C	-87.9457	196.762		C(C1C(C(CO1)C)C)(CC)C	156.269	4	8	5.11938	-21.7916	174.59	7.96539	23.31	23.31
C(=C)(C=C)C1C(=C)C(=C)CO1	-11.0696	197.51		C(C1C(C(CO1)C)C)(CC)C	156.269	4	8	5.11938	-21.7916	174.59	7.96539	29.91	29.91
C(=C(C=NC)C)(C)C	-39.0706	167.67		C(C(CNC)C)(C)C	115.22	2	4	3.47162	-68.089	125.688	7.08076	22.41	22.41
C(=C(CN=C)C)(C)C	-38.7277	155.808		C(C(CNC)C)(C)C	115.22	2	4	3.47162	-68.089	125.688	7.08076	25.24	25.24
C1(=C)C=CC(=C)C1=C(C)C	-83.9821	181.009		C(C1C(CCC1C)C)(C)C	140.27	4	8	5.70329	-103.026	160.867	7.36325	23.34	23.34
C(=C)(C1=C(C=CC1=C)C)C	-83.9821	181.009		C(C1C(CCC1C)C)(C)C	140.27	4	8	5.70329	-103.026	160.867	7.36325	23.51	23.51
C(=C)(C1C(=C)C=CC1=C)C	-83.7066	174.494		C(C1C(CCC1C)C)(C)C	140.27	4	8	5.70329	-103.026	160.867	7.36325	27.06	27.06
C(=C)(c1c(cccc1)C)C	-49.7273	182.562		C(C1C(CCCC1)C)(C)C	140.27	4	8	5.70329	-54.5473	168.101	7.4424	19.18	19.18
C(=C)(OOC(=C)C)C	-85.0871	119.951		C(OOC(C)C)(C)C	118.176	2	4	3.38478	-64.8965	109.945	7.43994	32.46	32.46
C(=C)(OOC=C)C	-84.7088	98.2916		C(OOCC)(C)C	104.149	2	4	3.84065	-70.3547	91.229	7.71404	33.17	33.17
C(=C)(C(=CC(=C)C=C)ON)C	-23.3256	202.778		C(C(ON)CC(CC)C)(C)C	159.273	4	8	5.02282	-48.1412	175.711	7.48914	27.59	27.59
C(=C)(c1c(C(=C)C)cco1)C	-87.9445	197.461		C(C1C(C(C)C)CCO1)(C)C	156.269	4	8	5.11938	-21.7733	174.59	7.43148	24.2	24.2
C(=O)(CC(=C(C)C)OC)C	-48.7139	179.819		C(CC(C(C)C)OC)(O)C	146.23	2	4	2.73542	-32.6237	188.535	7.49419	21.63	21.63
C(=C)(c1c(C(=C)C)coc1)C	-87.9458	194.089		C(C1C(C(C)C)COC1)(C)C	156.269	4	8	5.11938	-21.793	174.59	7.02741	24.12	24.12
C(=C1C(=C)C(=C)C=C1)(C)C	-83.9821	181.009		C(C1C(C(CC1)C)C)(C)C	140.27	4	8	5.70329	-103.026	160.867	7.70425	24.13	24.13
C(=C)(C1=C(C(=C)C=C1)C)C	-83.9821	181.009		C(C1C(C(CC1)C)C)(C)C	140.27	4	8	5.70329	-103.026	160.867	7.70425	22.54	22.54
C(=NC=C)(C=C)C	-34.8637	126.901		C(CC)(NCC)C	101.193	3	6	5.92926	-66.7259	99.4073	7.33184	25.31	25.31
C(=C(C=C)OC=C)(C=C)C	-57.1874	174.34		C(C(CC)OCC)(CC)C	144.258	4	8	5.54562	-85.5768	169.809	7.43992	30.09	30.09
C(=CC(=NC)COC)(OC)C	-44.8748	180.719		C(NC)(COC)CC(OC)C	161.245	2	4	2.4807	-55.1794	179.398	7.51364	25	25
C(=C)(OC)CC(=NC)COC	-44.8584	176.787		C(NC)(COC)CC(OC)C	161.245	2	4	2.4807	-55.1794	179.398	7.51364	27.94	27.94
C(=NC(=C(C)C)C)(C=C)C	-19.0607	170.168		C(CC)(NC(C(C)C)C)C	143.274	3	6	4.18778	-12.9917	154.117	7.50727	23.51	23.51
C(=C)(C=C)NC(=C(C)C)C	-56.9006	197.924		C(CC)(NC(C(C)C)C)C	143.274	3	6	4.18778	-12.9917	154.117	7.50727	24.59	24.59
C(=CN=C(COC)C)(OC)C	-44.9033	178.166		C(NCC(OC)C)(COC)C	161.245	2	4	2.4807	-66.3432	178.521	7.46659	23.94	23.94
C(=C)(OC)CN=C(COC)C	-44.8864	176.691		C(NCC(OC)C)(COC)C	161.245	2	4	2.4807	-66.3432	178.521	7.46659	27.47	27.47
C(=COC=C)(C=C)C	-37.5809	104.136		C(CC)(COCC)C	116.204	3	6	5.16333	-105.3	110.015	6.93893	31.84	31.84
C(=C)(C=C)COC=C	-10.1237	112.973		C(CC)(COCC)C	116.204	3	6	5.16333	-105.3	110.015	6.93893	31.2	31.2
C(=O)(C=C)COC=C	-11.9984	159.079		C(CC)(COCC)O	118.176	3	6	5.07717	-42.3059	153.012	7.02607	26.65	26.65
C(=NC=COCOC)(C)C	-39.4708	188.332		C(NCCOCOC)(C)C	147.218	2	4	2.71706	-15.4924	171.907	7.92516	24.88	24.88
C(=C(OC=C(C=C)C)C)(O)C	-13.9254	227.173		C(CC)(COC(C(O)C)C)C	160.257	3	6	3.74399	-31.3974	198.389	7.74118	32.15	32.15
C(=C(OCC(=C)C=C)C)(O)C	-14.3302	227.098		C(CC)(COC(C(O)C)C)C	160.257	3	6	3.74399	-31.3974	198.389	7.74118	31.01	31.01
C(=C)(ON=C(COC)C)C	-39.0471	189.761		C(NOC(C)C)(COC)C	147.218	2	4	2.71706	-11.0048	143.288	6.96645	27.25	27.25
C(=C)(C(OC)OC(=C)C)C	-73.8547	150.729		C(OC(C(C)C)OC)(C)C	146.23	2	4	2.73542	-79.4198	139.082	6.34328	31.7	31.7
C(=C)(OC(=C(C)C)OC)C	-74.6583	168.669		C(OC(C(C)C)OC)(C)C	146.23	2	4	2.73542	-79.4198	139.082	6.34328	34.29	34.29
C(OC(=O)C(=CN(C)C)C)(C)(C)C	-47.5646	219.884		C(OC(C(CN(C)C)C)O)(C)(C)C	189.299	2	4	2.11306	-23.4315	225.917	7.42839	6.87	6.87
C(OC(=O)C(=C)CN(C)C)(C)(C)C	-46.9253	208.118		C(OC(C(CN(C)C)C)O)(C)(C)C	189.299	2	4	2.11306	-23.4315	225.917	7.42839	11.57	11.57
C(=C)(OC(C=C(C)C)(C)C)C	-89.468	174.835		C(OC(C)C)(CC(C)C)(C)C	158.285	2	4	2.52709	-86.0852	171.841	7.80444	30.35	30.35
C(OC(=C)C)(CC(=C)C)(C)C	-91.723	170.809		C(OC(C)C)(CC(C)C)(C)C	158.285	2	4	2.52709	-86.0852	171.841	7.80444	31.51	31.51
C(=C)(OC(=C)C)C	-72.0501	94.5427		C(OC(C)C)(C)C	102.177	2	4	3.91478	-97.1156	76.1382	7.62131	32.93	32.93
C(=CC(=C)OC(C)(C)C)(C)C	-89.466	178.891		C(OC(CC(C)C)C)(C)(C)C	158.285	2	4	2.52709	-86.0839	171.841	6.49154	27.96	27.96
C(OC(=CC(=C)C)C)(C)(C)C	-89.466	178.891		C(OC(CC(C)C)C)(C)(C)C	158.285	2	4	2.52709	-86.0839	171.841	6.49154	30.47	30.47
C(OC(=C)CC(=C)C)(C)(C)C	-91.7212	170.809		C(OC(CC(C)C)C)(C)(C)C	158.285	2	4	2.52709	-86.0839	171.841	6.49154	31.36	31.36
C(OC(=C)C=C)(C)(C)C	-85.6329	144.544		C(OC(CC)C)(C)(C)C	130.231	2	4	3.07147	-93.2023	127.477	6.47028	32.18	32.18
C(OC(=C)C=N)(C)(C)C	-53.7271	135.354		C(OC(CN)C)(C)(C)C	131.219	2	4	3.04834	-80.1155	153.431	6.85786	28.1	28.1
C(OC(=C)C=O)(C)(C)C	-52.5177	155.508		C(OC(CO)C)(C)(C)C	132.203	2	4	3.02565	-39.8645	169.581	6.63263	26.44	26.44
C(OC(=COC=C)C)(C)(C)C	-72.3481	173.905		C(OC(COCC)C)(C)(C)C	160.257	2	4	2.49599	-71.9304	169.532	5.95281	35.61	35.61
C(OC(=C)OC(=C)C)(C)(C)C	-71.5285	163.093		C(OC(OC(C)C)C)(C)(C)C	160.257	2	4	2.49599	-71.785	160.531	5.58677	36.88	36.88
C(OC(=C)COC=C)(C)(C)C	-71.7072	169.201		C(OC(COCC)C)(C)(C)C	160.257	2	4	2.49599	-71.9304	169.532	5.95281	34.68	34.68
C(=C)(OC(=C)OC)C	-83.9283	119.912		C(OC(OC)C)(C)C	118.176	2	4	3.38478	-80.3842	105.433	6.28683	34.97	34.97
C(=C)(C(=CC(OC)(C)C)O)C	-13.4858	215.936		C(OC)(CC(C(C)C)O)(C)C	160.257	2	4	2.49599	-18.9781	195.912	6.87243	27.03	27.03
C(=C)(C(=O)CC(OC)(C)C)C	-69.7379	195.22		C(OC)(CC(C(C)C)O)(C)C	160.257	2	4	2.49599	-18.9781	195.912	6.87243	20.68	20.68
C(C=C(C(=C)C)OC)(OC)(C)C	-71.5441	205.04		C(OC)(CC(C(C)C)OC)(C)C	174.284	2	4	2.2951	-53.036	173.091	6.2716	27.12	27.12
C(OC)(CC(=C(C=C)C)O)(C)C	-41.2445	222.063		C(OC)(CC(C(CC)C)O)(C)C	174.284	2	4	2.2951	-34.4303	213.553	7.48671	27.44	27.44
C(C=C(C(=C)N)C)(OC)(C)C	-55.8199	199.056		C(OC)(CC(C(N)C)C)(C)C	159.273	2	4	2.51141	-68.3809	185.282	7.56949	23.46	23.46
C(OC)(C=C(C(=N)C)C)(C)C	-31.5871	179.866		C(OC)(CC(C(N)C)C)(C)C	159.273	2	4	2.51141	-68.3809	185.282	7.56949	21.92	21.92
C(OC)(CC(=C)C(=C)N)(C)C	-55.8191	198.646		C(OC)(CC(C(N)C)C)(C)C	159.273	2	4	2.51141	-68.3809	185.282	7.56949	27.4	27.4
C(OC)(CC(=C)C(=N)C)(C)C	-31.5206	179.314		C(OC)(CC(C(N)C)C)(C)C	159.273	2	4	2.51141	-68.3809	185.282	7.56949	23.86	23.86
C(OC)(C=C(C(=O)C)C)(C)C	-69.6742	202.19		C(OC)(CC(C(O)C)C)(C)C	160.257	2	4	2.49599	-28.3259	193.639	7.48652	19.13	19.13
C(OC)(CC(=C)C(=O)C)(C)C	-69.7385	195.22		C(OC)(CC(C(O)C)C)(C)C	160.257	2	4	2.49599	-28.3259	193.639	7.48652	21.16	21.16
C(C=C(C(=C)O)C)(OC)(C)C	-30.377	216.09		C(OC)(CC(C(O)C)C)(C)C	160.257	2	4	2.49599	-28.3259	193.639	7.48652	27.66	27.66
C(OC)(CC(=C)C(=C)O)(C)C	-19.5624	216.598		C(OC)(CC(C(O)C)C)(C)C	160.257	2	4	2.49599	-28.3259	193.639	7.48652	31.43	31.43
C(OC)(CC(=O)C=C(C)C)(C)C	-54.3668	215.922		C(OC)(CC(CC(C)C)O)(C)C	174.284	2	4	2.2951	-34.2939	214.747	6.87681	16.53	16.53
C(=C)(CC(=CC(OC)(C)C)O)C	-21.3646	222.014		C(OC)(CC(CC(C)C)O)(C)C	174.284	2	4	2.2951	-34.2939	214.747	6.87681	29.8	29.8
C(=C)(C(=C)C=CN=C)C	-61.4236	176.334		C(C(CCNC)C)(C)C	129.247	4	8	6.1897	-67.7669	142.773	7.13117	26.54	26.54
C(C=C(C=C(C)C)O)(OC)(C)C	-11.6441	232.233		C(OC)(CC(CC(C)C)O)(C)C	174.284	2	4	2.2951	-34.2939	214.747	6.87681	26.97	26.97
C(OC)(C=C(C=C(O)C)C)(C)C	-13.2149	231.323		C(OC)(CC(CC(O)C)C)(C)C	174.284	2	4	2.2951	-28.339	219.047	7.48671	26.31	26.31
C(=C)(C=C(CC(OC)(C)C)O)C	-21.3646	222.08		C(OC)(CC(CC(C)C)O)(C)C	174.284	2	4	2.2951	-34.2939	214.747	6.87681	27.26	27.26
C(=O)(CC(=CC(OC)(C)C)C)C	-54.3542	214.966		C(OC)(CC(CC(O)C)C)(C)C	174.284	2	4	2.2951	-28.339	219.047	7.48671	20.28	20.28
C(=C)(CC(=O)CC(OC)(C)C)C	-54.602	214.429		C(OC)(CC(CC(C)C)O)(C)C	174.284	2	4	2.2951	-34.2939	214.747	6.87681	20.4	20.4
C(=C)(C=C(CC(OC)(C)C)C)O	-33.3213	227.065		C(OC)(CC(CC(O)C)C)(C)C	174.284	2	4	2.2951	-28.339	219.047	7.48671	26.97	26.97
C(=C)(CC(=CC(OC)(C)C)C)O	-14.1063	226.898		C(OC)(CC(CC(O)C)C)(C)C	174.284	2	4	2.2951	-28.339	219.047	7.48671	29.46	29.46
C(=CC(=C)CC(OC)(C)C)(O)C	-14.1063	227.044		C(OC)(CC(CC(O)C)C)(C)C	174.284	2	4	2.2951	-28.339	219.047	7.48671	28.38	28.38
C(OC)(CC(=CC(=O)C)C)(C)C	-54.3542	215.922		C(OC)(CC(CC(O)C)C)(C)C	174.284	2	4	2.2951	-28.339	219.047	7.48671	18.65	18.65
C(=C)(CC(=O)C)CC(OC)(C)C	-54.5872	214.429		C(OC)(CC(CC(O)C)C)(C)C	174.284	2	4	2.2951	-28.339	219.047	7.48671	21.9	21.9
C(OC)(CC(=C)CC(=C)O)(C)C	-14.8611	216.234		C(OC)(CC(CC(O)C)C)(C)C	174.284	2	4	2.2951	-28.339	219.047	7.48671	31.18	31.18
C(OC)(C=C(C=C)N)(C)C	-28.8698	182.216		C(OC)(CC(CC)N)(C)C	145.246	2	4	2.75395	-68.4442	178.469	7.03524	24.25	24.25
C(OC)(CC(=N)C=C)(C)C	-33.821	159.892		C(OC)(CC(CC)N)(C)C	145.246	2	4	2.75395	-68.4442	178.469	7.03524	24.22	24.22
C(OC)(C=C(C=C)O)(C)C	-37.9323	173.35		C(OC)(CC(CC)O)(C)C	146.23	2	4	2.73542	-46.4976	189.747	6.87467	27.66	27.66
C(OC)(CC(=O)C=C)(C)C	-62.2388	170.587		C(OC)(CC(CC)O)(C)C	146.23	2	4	2.73542	-46.4976	189.747	6.87467	21.59	21.59
C(=C)(C(=C)C=COC=C)O	-12.6829	215.099		C(C(CCOCC)C)(O)C	146.23	4	8	5.47083	-31.7848	190.933	7.54622	32.11	32.11
C(=C)(COC(C=C)(C=O)C)C	-30.4131	215.288		C(CC)(CO)(OCC(C)C)C	160.257	3	6	3.74399	-22.6888	202.559	6.87243	26.51	26.51
C(OC)(C=C(OC=C)C)(C)C	-72.355	174.015		C(OC)(CC(OCC)C)(C)C	160.257	2	4	2.49599	-71.9971	169.532	6.5553	33.13	33.13
C(C=C)(OC)(C=C(OC)C)C	-72.3601	175.973		C(OC)(CC)(CC(OC)C)C	160.257	2	4	2.49599	-72.0398	169.532	7.19224	31.2	31.2
C(=C)(OC)CC(C=C)(OC)C	-71.723	169.123		C(OC)(CC)(CC(OC)C)C	160.257	2	4	2.49599	-72.0398	169.532	7.19224	32.41	32.41
C(OC)(CC(=C)OC=C)(C)C	-71.7147	169.201		C(OC)(CC(OCC)C)(C)C	160.257	2	4	2.49599	-71.9971	169.532	6.5553	34.07	34.07
C(C=C)(C=COC)(OC)C	-74.0945	163.517		C(OC)(CC)(CCOC)C	146.23	2	4	2.73542	-79.2422	143.864	6.35775	32.65	32.65
C(C=C)(OC)(COC=C)C	-73.5522	146.773		C(OC)(CC)(COCC)C	146.23	2	4	2.73542	-79.1571	143.864	6.52621	33.53	33.53
C(C=C)(OC)(C=O)C	-11.4615	141.971		C(OC)(CC)(CO)C	118.176	2	4	3.38478	-50.2045	148.673	7.00338	25.41	25.41
C(C=CC(=C(C)C)O)(OC)(C)C	-11.6652	231.31		C(OC)(CCC(C(C)C)O)(C)C	174.284	2	4	2.2951	-34.2384	214.849	6.87681	27.72	27.72
C(C=CC(=C(O)C)C)(OC)(C)C	-25.285	231.32		C(OC)(CCC(C(O)C)C)(C)C	174.284	2	4	2.2951	-44.8184	217.749	7.48671	26.64	26.64
C(C=CC(=N)C)(OC)(C)C	-12.8652	157.119		C(OC)(CCC(N)C)(C)C	145.246	2	4	2.75395	-72.0102	178.471	7.03524	23.36	23.36
C(=C)(C=CC(OC)(C)C)N	-28.6833	188.194		C(OC)(CCC(N)C)(C)C	145.246	2	4	2.75395	-72.0102	178.471	7.03524	24.32	24.32
C(=C)(C=CC(OC)(C)C)O	-16.847	173.713		C(OC)(CCC(O)C)(C)C	146.23	2	4	2.73542	-13.7522	188.838	6.87467	28.53	28.53
C(C=CC(=O)C)(OC)(C)C	-65.8959	175.268		C(OC)(CCC(O)C)(C)C	146.23	2	4	2.73542	-13.7522	188.838	6.87467	20.59	20.59
C(=C)(C(=C)C=COC=COC)C	-66.7852	204.425		C(C(CCOCCOC)C)(C)C	174.284	4	8	4.59021	-56.2015	186.126	6.23183	31.53	31.53
C(=C)(C=C)CN=C	-34.337	131.644		C(CC)(CNC)C	101.193	3	6	5.92926	-68.3109	100.085	7.40619	28.44	28.44
C(=CN=C)(C=C)C	-60.0223	126.87		C(CC)(CNC)C	101.193	3	6	5.92926	-68.3109	100.085	7.40619	25.93	25.93
C(=C)(C=C)C=NC	-60.0223	126.893		C(CC)(CNC)C	101.193	3	6	5.92926	-68.3109	100.085	7.40619	27.01	27.01
C(=C)(OC)C=N	-30.2221	92.8181		C(OC)(CN)C	89.138	2	4	4.48742	-45.392	99.3694	7.20869	27.04	27.04
C(C=COC=C)(OC)(C)C	-74.0949	163.51		C(OC)(CCOCC)(C)C	146.23	2	4	2.73542	-79.1761	143.864	7.77673	34.07	34.07
C(=CC(C=N)(OC)C)(C)C	-12.9081	159.925		C(OC)(CN)(CC(C)C)C	145.246	2	4	2.75395	-71.9076	173.941	7.1129	25.02	25.02
C(=C)(CC(OC)(C=N)C)C	-12.7856	159.87		C(OC)(CN)(CC(C)C)C	145.246	2	4	2.75395	-71.9076	173.941	7.1129	26.41	26.41
C(=C)(C(=C)N(C(=C)C(=O)C)C)C	-35.2762	211.14		C(C(N(C(C(O)C)C)C)C)(C)C	173.3	4	8	4.61627	-17.052	211.888	7.79848	23.31	23.31
C(=C)(C(=C)N(C(=C)C=C)C)C	-44.1888	192.788		C(C(N(C(CC)C)C)C)(C)C	157.301	4	8	5.08579	-44.813	164.687	7.45422	26.69	26.69
C(=C)(C(=O)N(C(=C)C=C)C)OC	-31.0082	235.743		C(C(N(C(CC)C)C)O)(OC)C	175.272	4	8	4.56433	-31.926	211.936	7.85918	19.91	19.91
C(=COC)(OC)C=NC	-35.8789	184.95		C(OC)(CNC)COC	133.191	2	4	3.00321	-12.1975	147.541	6.83028	27.83	27.83
C(=CN=C)(OC)COC	-36.0302	184.168		C(OC)(CNC)COC	133.191	2	4	3.00321	-12.1975	147.541	6.83028	25.52	25.52
C(=C)(C(=O)C)N(C=C)C=C	-43.724	190.248		C(C(N(CC)CC)C)(O)C	145.246	4	8	5.5079	-12.0804	187.746	7.5299	22.62	22.62
C(=COC)(OC)CN=C	-36.0302	184.168		C(OC)(CNC)COC	133.191	2	4	3.00321	-12.1975	147.541	6.83028	29.15	29.15
C1=CN(C(=C(C=C)C)C)C=CO1	-32.3436	231.492		C(C(N1CCOCC1)C)(CC)C	171.284	4	8	4.67061	-31.4199	185.436	7.49837	24.82	24.82
C(OC)(C=NC=COC)(C)C	-44.796	177.105		C(OC)(CNCCOC)(C)C	161.245	2	4	2.4807	-53.3489	178.731	7.83352	25.17	25.17
C(=C)(N(C=C(C=C)C)C)C	-45.4152	171.237		C(CC)(CN(C(C)C)C)C	143.274	3	6	4.18778	-51.1342	154.608	7.11837	23.65	23.65
C(=C)(N(CC(=C)C=C)C)C	-45.3223	170.744		C(CC)(CN(C(C)C)C)C	143.274	3	6	4.18778	-51.1342	154.608	7.11837	27.53	27.53
C(=CC(C=O)(OC)C)(C)C	-65.8964	170.719		C(OC)(CO)(CC(C)C)C	146.23	2	4	2.73542	-23.3642	178.967	6.96929	22.92	22.92
C(C=NOC=C)(OC)(C)C	-39.2049	184.636		C(OC)(CNOCC)(C)C	147.218	2	4	2.71706	-10.112	143.303	7.9032	29.76	29.76
C(=C)(CC(OC)(C=O)C)C	-62.2387	172.129		C(OC)(CO)(CC(C)C)C	146.23	2	4	2.73542	-23.3642	178.967	6.96929	23.71	23.71
C(=C)(OC)OC(=C(C)C)C	-74.6579	168.669		C(OC)(OC(C(C)C)C)C	146.23	2	4	2.73542	-79.4395	139.082	7.24925	34.86	34.86
C(=C)(C=C)OC(OC)(C)C	-73.4149	144.142		C(OC)(OC(CC)C)(C)C	146.23	2	4	2.73542	-79.4849	139.779	6.3663	32.4	32.4
C(=C)(C=C)C=COC	-37.6576	104.29		C(CC)(CCOC)C	116.204	3	6	5.16333	-105.309	110.015	7.0472	30.31	30.31
C(OC)(OC=CC(=C)C)(C)C	-72.352	174.015		C(OC)(OCCC(C)C)(C)C	160.257	2	4	2.49599	-71.9701	165.865	7.78673	32.51	32.51
C(Oc1oc(c(c1)C)C)(C)(C)C	-66.1665	191.222		C(OC1OC(C(C1)C)C)(C)(C)C	172.268	2	4	2.32196	-74.3596	175.813	7.71491	22.69	22.69
C(OC=C(C(=C)C)C)(C)(C)C	-89.465	178.891		C(OCC(C(C)C)C)(C)(C)C	158.285	2	4	2.52709	-86.083	171.841	6.03181	32.33	32.33
C(OCC(=C)C(=C)C)(C)(C)C	-91.7201	174.127		C(OCC(C(C)C)C)(C)(C)C	158.285	2	4	2.52709	-86.083	171.841	6.03181	28.89	28.89
C(OCC(=C(C)C)C=N)(C)(C)C	-40.2965	199.882		C(OCC(C(C)C)CN)(C)(C)C	173.3	2	4	2.30814	-60.1117	211.087	6.84529	21.25	21.25
C(OC=C(C(=C)C)N)(C)(C)C	-42.5128	199.113		C(OCC(C(C)C)N)(C)(C)C	159.273	2	4	2.51141	-68.1221	185.778	6.84136	29.66	29.66
C(OCC(=N)C(=C)C)(C)(C)C	-50.1067	179.28		C(OCC(C(C)C)N)(C)(C)C	159.273	2	4	2.51141	-68.1221	185.778	6.84136	23.63	23.63
C(OC=C(C(=C)C)O)(C)(C)C	-27.9183	216.012		C(OCC(C(C)C)O)(C)(C)C	160.257	2	4	2.49599	-25.834	194.109	6.64457	33.93	33.93
C(OCC(=O)C(=C)C)(C)(C)C	-69.7376	195.22		C(OCC(C(C)C)O)(C)(C)C	160.257	2	4	2.49599	-25.834	194.109	6.64457	21.39	21.39
C(OCC(=C)C(=O)C)(C)(C)C	-69.7375	195.22		C(OCC(C(O)C)C)(C)(C)C	160.257	2	4	2.49599	-44.1193	193.661	7.37532	21.66	21.66
C(OC=C(C(=C)O)C)(C)(C)C	-36.9465	216.133		C(OCC(C(O)C)C)(C)(C)C	160.257	2	4	2.49599	-44.1193	193.661	7.37532	33.7	33.7
C(OC=C(C(=O)C)C)(C)(C)C	-69.6727	202.024		C(OCC(C(O)C)C)(C)(C)C	160.257	2	4	2.49599	-44.1193	193.661	7.37532	23.72	23.72
C(OCC(=C)C(=C)O)(C)(C)C	-12.8778	216.65		C(OCC(C(O)C)C)(C)(C)C	160.257	2	4	2.49599	-44.1193	193.661	7.37532	30.75	30.75
C(OC=C(C(=C)OC)C)(C)(C)C	-71.5295	205.005		C(OCC(C(OC)C)C)(C)(C)C	174.284	2	4	2.2951	-53.1537	173.091	7.2129	33.69	33.69
C(OCC(=C)C(=C)OC)(C)(C)C	-70.9071	199.48		C(OCC(C(OC)C)C)(C)(C)C	174.284	2	4	2.2951	-53.1537	173.091	7.2129	30.8	30.8
C(OCC(=C)C=C)(C)(C)C	-92.3492	159.029		C(OCC(CC)C)(C)(C)C	144.258	2	4	2.77281	-86.0989	162.239	6.64226	29.21	29.21
C(OC=C(C=C)C)(C)(C)C	-91.7204	156.721		C(OCC(CC)C)(C)(C)C	144.258	2	4	2.77281	-86.0989	162.239	6.64226	32.42	32.42
C(OC=C(C=C)N)(C)(C)C	-28.665	188.298		C(OCC(CC)N)(C)(C)C	145.246	2	4	2.75395	-71.8445	173.976	6.94694	29.75	29.75
C(OCC(=N)C=C)(C)(C)C	-12.7509	159.891		C(OCC(CC)N)(C)(C)C	145.246	2	4	2.75395	-71.8445	173.976	6.94694	24.53	24.53
C(OC=C(C=N)C)(C)(C)C	-41.2359	157.075		C(OCC(CN)C)(C)(C)C	145.246	2	4	2.75395	-62.7607	178.456	6.94694	27.7	27.7
C(OCC(=C)C=N)(C)(C)C	-53.7262	159.905		C(OCC(CN)C)(C)(C)C	145.246	2	4	2.75395	-62.7607	178.456	6.94694	25.18	25.18
C(OCC(=O)N(C=C)C)(C)(C)C	-45.6219	225.807		C(OCC(N(CC)C)O)(C)(C)C	175.272	2	4	2.28217	-10.3913	212.026	6.93305	11.15	11.15
C(=C)(OC=C(OC)C)C	-87.6973	151.128		C(OCC(OC)C)(C)C	132.203	2	4	3.02565	-80.067	119.758	6.05482	33.85	33.85
C(=C)(OCC(=C)OC)C	-76.1824	139.263		C(OCC(OC)C)(C)C	132.203	2	4	3.02565	-80.067	119.758	6.05482	33.08	33.08
C(=C)(C(=O)OC(=C)C(=C)C)C	-51.1371	182.71		C(C(OC(C(C)C)C)O)(C)C	160.257	4	8	4.99198	-12.3855	176.242	7.30178	21.24	21.24
C(OCC1=C(NOC1=C)C)(C)(C)C	-17.2781	217.619		C(OCC1C(NOC1C)C)(C)(C)C	187.283	2	4	2.13581	-13.6853	213.809	7.79023	25.66	25.66
C(OC=CC(=C(O)C)C)(C)(C)C	-25.7173	231.305		C(OCCC(C(O)C)C)(C)(C)C	174.284	2	4	2.2951	-28.3126	217.786	7.43623	31.98	31.98
C(OC=CC(=C)C)(C)(C)C	-91.7197	156.721		C(OCCC(C)C)(C)(C)C	144.258	2	4	2.77281	-86.0985	162.239	7.80086	32.2	32.2
C(OC=CC(=O)C)(C)(C)C	-65.8978	175.268		C(OCCC(O)C)(C)(C)C	146.23	2	4	2.73542	-26.077	191.407	6.76477	24.18	24.18
C(OC=CC(=C)O)(C)(C)C	-14.6417	173.76		C(OCCC(O)C)(C)(C)C	146.23	2	4	2.73542	-26.077	191.407	6.76477	33.56	33.56
C(=C)(C(=O)OCC(=C)C(=C)C)C	-66.873	200.175		C(C(OCC(C(C)C)C)O)(C)C	174.284	4	8	4.59021	-11.5004	194.391	7.23509	20.72	20.72
C(=C)(C(=C)OC=C)OC=C	-35.4946	169.008		C(C(OCC)C)(OCC)C	146.23	4	8	5.47083	-79.0419	142.411	6.43597	34	34
C(=C)(C(=O)OC=C(C(=C)C)C)C	-49.2593	205.102		C(C(OCC(C(C)C)C)O)(C)C	174.284	4	8	4.59021	-11.5004	194.391	7.23509	20.91	20.91
C(=O)(C(=C(C=C)C)C)OC=C	-47.1917	186.932		C(C(OCC)O)(C(CC)C)C	160.257	4	8	4.99198	-24.0083	176.417	7.74118	19.91	19.91
C(=C)(OC=COC)C	-83.9663	132.878		C(OCCOC)(C)C	118.176	2	4	3.38478	-83.9641	108.421	7.7188	34.25	34.25
C(=C)(OCOC=C)C	-83.9446	123.09		C(OCOCC)(C)C	118.176	2	4	3.38478	-84.3717	107.501	7.76348	34.07	34.07
C(=C)OCOC=C	-82.9833	98.2111		C(OCOCC)C	104.149	2	4	3.84065	-67.7947	92.5823	7.60519	34.48	34.48
C(=C)OC(N(C)C)OC=C	-32.4048	185.074		N(C(OCC)OCC)(C)C	147.218	2	4	2.71706	-30.8797	141.434	7.68666	34.34	34.34
C(OCc1occc1)(C)(C)C	-63.4164	194.364		C(OCC1OCCC1)(C)(C)C	158.241	2	4	2.52779	-70.9607	187.681	6.7395	19.72	19.72
C(ONC(=C)C(=C)C)(C)(C)C	-56.2872	175.143		C(ONC(C(C)C)C)(C)(C)C	159.273	2	4	2.51141	-71.2082	156.217	6.76862	26.54	26.54
C(ONC(=C)C=C)(C)(C)C	-34.5598	154.832		C(ONC(CC)C)(C)(C)C	145.246	2	4	2.75395	-71.1494	144.689	6.88544	26.87	26.87
C(ON=CC(=C)OC)(C)(C)C	-44.7612	176.347		C(ONCC(OC)C)(C)(C)C	161.245	2	4	2.4807	-11.603	163.122	6.77421	27.55	27.55
C(=C)(C1N(C(=C)C(=C)N1C)C)C	-16.3542	192.255		C(C1N(C(C(N1C)C)C)C)(C)C	170.3	3	6	3.52319	-20.6796	183.668	7.31334	25.35	25.35
C(=C)(OC=C(C=C)C)OC=C	-70.0651	187.181		C(CC)(COC(OCC)C)C	160.257	4	8	4.99198	-75.81	168.432	7.26015	34.11	34.11
C(=C1OC(=C)C(=C)O1)(C)C	-11.4246	175.929		C(C1OC(C(O1)C)C)(C)C	144.214	3	6	4.16048	-74.6182	145.284	6.99361	35.25	35.25
C(=C)(OCC(=C)C=C)OC=C	-70.0387	187.213		C(CC)(COC(OCC)C)C	160.257	4	8	4.99198	-75.81	168.432	7.26015	33.18	33.18
C(=C)(c1occc1)C	-84.1066	135.475		C(C1OCCC1)(C)C	114.188	3	6	5.25449	-29.8701	130.132	7.0246	21.96	21.96
C(=COc1occc1)(C=C)C	-33.648	219.614		C(CC)(COC1OCCC1)C	158.241	4	8	5.05558	-70.0168	183.649	7.58527	26.96	26.96
C(=C)(C=C)COc1occc1	-32.6707	218.921		C(CC)(COC1OCCC1)C	158.241	4	8	5.05558	-70.0168	183.649	7.58527	25.95	25.95
C(=C)(C=C)COC=C(C=C)C	-46.8782	188.901		C(CC)(COCC(CC)C)C	158.285	4	8	5.05417	-85.7079	175.407	7.00182	30.22	30.22
C(=COC=C(C=C)C)(C=C)C	-57.1016	188.133		C(CC)(COCC(CC)C)C	158.285	4	8	5.05417	-85.7079	175.407	7.00182	30.7	30.7
C(=C)(C=C)COCC(=C)C=C	-46.4347	188.937		C(CC)(COCC(CC)C)C	158.285	4	8	5.05417	-85.7079	175.407	7.00182	29.18	29.18
C(=COC=C)(C=C)COC=C	-70.0711	186.84		C(CC)(COCC)COCC	160.257	4	8	4.99198	-73.7274	175.262	7.66207	32.59	32.59
C(=CN(C)C)(C1OC=CO1)C	-15.6271	213.404		N(CC(C1OCCO1)C)(C)C	159.229	2	4	2.51211	-45.2153	184.686	6.48576	29.39	29.39
C(=C1OC=CO1)(CN(C)C)C	-15.8631	214.17		N(CC(C1OCCO1)C)(C)C	159.229	2	4	2.51211	-45.2153	184.686	6.48576	34.35	34.35
C(=C)(C1OC=CO1)CN(C)C	-16.0597	222.686		N(CC(C1OCCO1)C)(C)C	159.229	2	4	2.51211	-45.2153	184.686	6.48576	33.62	33.62
C(=C)(C=CC(=COC)C)C	-58.7502	172.32		C(CCC(COC)C)(C)C	144.258	3	6	4.15921	-85.504	169.807	6.61507	26.68	26.68
C(=C)(C=CC(=C)COC)C	-78.6071	175.764		C(CCC(COC)C)(C)C	144.258	3	6	4.15921	-85.504	169.807	6.61507	25.87	25.87
C(=C)(C=CC(=COC)C)O	-22.4359	215.236		C(CCC(COC)C)(O)C	146.23	3	6	4.10313	-23.4199	196.342	7.59353	28.85	28.85
C(=C)(C=CC(=COCOC)C)C	-67.3096	216.71		C(CCC(COCOC)C)(C)C	174.284	3	6	3.44266	-56.1442	186.047	6.42088	27.65	27.65
C(=C)(C=CC(=C)COCOC)C	-67.5454	193.257		C(CCC(COCOC)C)(C)C	174.284	3	6	3.44266	-56.1442	186.047	6.42088	26.25	26.25
C(=C)(N(C)C)CN=C	-20.1774	162.076		N(C(CNC)C)(C)C	116.208	2	4	3.4421	-20.6357	133.997	7.16664	24.8	24.8
C(=CN=C)(N(C)C)C	-20.7049	184.989		N(C(CNC)C)(C)C	116.208	2	4	3.4421	-20.6357	133.997	7.16664	21.42	21.42
C(=C)(N(C)C)C=NC	-20.7049	182.7		N(C(CNC)C)(C)C	116.208	2	4	3.4421	-20.6357	133.997	7.16664	22.8	22.8
C(=CN(C)C)(C(=O)COC)C	-45.0975	224.988		N(CC(C(COC)O)C)(C)C	161.245	2	4	2.4807	-10.1188	196.492	7.60405	15.66	15.66
C(=C)(C(=O)COC)CN(C)C	-45.0503	217.129		N(CC(C(COC)O)C)(C)C	161.245	2	4	2.4807	-10.1188	196.492	7.60405	21.57	21.57
C(=C)(C=CC(=C)N(C)C)C	-45.2629	171.722		C(CCC(N(C)C)C)(C)C	143.274	3	6	4.18778	-49.9272	154.732	6.92461	24.83	24.83
C(=Cc1occc1)(C)C	-86.499	159.772		C(CC1OCCC1)(C)C	128.215	3	6	4.67964	-13.9008	128.191	7.08314	21.76	21.76
C(=C)(Cc1occc1)C	-86.2563	161.621		C(CC1OCCC1)(C)C	128.215	3	6	4.67964	-13.9008	128.191	7.08314	21.05	21.05
C1(=COC(=C(C)C)O1)C	-26.4858	194.634		C1(COC(C(C)C)O1)C	130.187	2	4	3.0725	-72.8314	149.019	7.30107	35.15	35.15
C1(=C)COC(=C(C)C)O1	-17.8681	184.285		C1(COC(C(C)C)O1)C	130.187	2	4	3.0725	-72.8314	149.019	7.30107	35.25	35.25
C(=C)(C1OC=C(O1)C)C	-18.6116	184.141		C1(COC(C(C)C)O1)C	130.187	2	4	3.0725	-72.8314	149.019	7.30107	32.56	32.56
C1(=COC(=C(O)C)C1)C	-19.7218	215.98		C1(COC(C(O)C)C1)C	130.187	2	4	3.0725	-10.1123	185.265	7.81534	32.81	32.81
C1(=C)CC(=C(O)C)OC1	-20.0075	205.913		C1(COC(C(O)C)C1)C	130.187	2	4	3.0725	-10.1123	185.265	7.81534	31.81	31.81
C1(=CC(=C(O)C)OC1)C	-19.8053	215.978		C1(COC(C(O)C)C1)C	130.187	2	4	3.0725	-10.1123	185.265	7.81534	27.79	27.79
C(=C(C=C)C=C)(C=N)C	-15.2029	178.702		C(C(CC)CC)(CN)C	129.247	4	8	6.1897	-31.117	159.451	7.03207	24.26	24.26
C(=C(C=C)C=C)(N=C)C	-61.4199	171.662		C(C(CC)CC)(NC)C	129.247	4	8	6.1897	-62.3567	142.956	7.13117	25.85	25.85
C(=C)(C(=C)C=C)NOC=C	-22.8295	182.048		C(C(CC)C)(NOCC)C	145.246	4	8	5.5079	-71.1704	144.738	7.64656	29.41	29.41
C(=C(C=C)C=C)(C=C)N	-21.5897	196.854		C(C(CC)CC)(CC)N	129.247	4	8	6.1897	-38.7825	160.272	6.91499	26.24	26.24
C(=Cc1onc(c1)C)(C)C	-49.4945	194.44		C(CC1ONC(C1)C)(C)C	143.23	3	6	4.18907	-24.8853	154.822	7.71176	21.1	21.1
C(=C)(Cc1cc(no1)C)C	-48.6041	191.54		C(CC1ONC(C1)C)(C)C	143.23	3	6	4.18907	-24.8853	154.822	7.71176	20.33	20.33
C(=C(C=CC(=C)C)OC)(C)C	-68.0551	188.658		C(CCC(C(C)C)OC)(C)C	158.285	3	6	3.79063	-84.8405	176.029	6.61751	26.64	26.64
C(=COC=C)(C(=C)C=C)COC	-66.0889	199.137		C(C(CC)C)(COCC)COC	174.284	4	8	4.59021	-56.1134	186.126	7.27382	31.34	31.34
C(=COC)(C(=C)C=C)COC=C	-66.0889	199.137		C(C(CC)C)(COCC)COC	174.284	4	8	4.59021	-56.1134	186.126	7.27382	31.34	31.34
C(=COC)(C=CC(=C(C)C)O)C	-10.2456	239.596		C(CCC(C(C)C)O)(COC)C	174.284	3	6	3.44266	-34.3684	222.132	7.48524	27.49	27.49
C(=C)(C=CC(=C(C)C)O)COC	-10.3799	223.777		C(CCC(C(C)C)O)(COC)C	174.284	3	6	3.44266	-34.3684	222.132	7.48524	26.79	26.79
C(=C)(CC1(OC=CO1)C)C	-10.7871	198.858		C1(OCCO1)(CC(C)C)C	144.214	2	4	2.77366	-67.9002	152.507	7.73508	34.36	34.36
C(=O)(C(=C(N(C)C)C)C)C	-45.4704	208.075		N(C(C(C(O)C)C)C)(C)C	145.246	2	4	2.75395	-11.5179	189.165	7.85372	13.53	13.53
C(=O)(C(=C(N(C)C)C)N(C)C)C	-10.8078	216.785		N(C(C(O)C)C(N(C)C)C)(C)C	174.288	2	4	2.29505	-10.1849	210.171	7.6213	11.88	11.88
C(=O)(C(C(=C)N(C)C)N(C)C)C	-12.2343	203.897		N(C(C(O)C)C(N(C)C)C)(C)C	174.288	2	4	2.29505	-10.1849	210.171	7.6213	18.97	18.97
C(=O)(C(=C(OC)C)N(C)C)C	-45.0705	220.651		N(C(C(O)C)C(OC)C)(C)C	161.245	2	4	2.4807	-10.1257	202.483	7.72708	17.7	17.7
C(=C)(OC)C(C(=O)C)N(C)C	-45.0333	204.808		N(C(C(O)C)C(OC)C)(C)C	161.245	2	4	2.4807	-10.1257	202.483	7.72708	23.72	23.72
C(=C(C=C(N(C)C)C)O)(C)C	-12.3004	248.437		N(C(CC(C(C)C)O)C)(C)C	159.273	2	4	2.51141	-51.1373	208.056	7.61518	20.96	20.96
C(=C(CC(=C)N(C)C)O)(C)C	-12.4414	234.625		N(C(CC(C(C)C)O)C)(C)C	159.273	2	4	2.51141	-51.1373	208.056	7.61518	25.65	25.65
C(=C)(C(=C)C=C)C=C	-14.1031	136.672		C(C(CC)C)(CC)C	114.232	4	8	7.00329	-108.342	113.5	6.88678	29.51	29.51
C(=C)(N(C)C)C=C	-59.2218	145.248		N(C(CC)C)(C)C	101.193	2	4	3.95284	-126.176	82.4768	7.05667	26.09	26.09
C(=C)(C(=CN=C)C)C=C	-61.4217	171.657		C(C(CC)C)(CNC)C	129.247	4	8	6.1897	-67.4716	142.87	7.64431	26.93	26.93
C(=C)(C(=C)C=C)CN=C	-61.4487	173.392		C(C(CC)C)(CNC)C	129.247	4	8	6.1897	-67.4716	142.87	7.64431	28.8	28.8
C(=C)(C(=C)C=C)C=NC	-61.4217	176.327		C(C(CC)C)(CNC)C	129.247	4	8	6.1897	-67.4716	142.87	7.64431	27.97	27.97
C(=C(C=C)C)(C=NC=C)C	-51.929	175.196		C(C(CC)C)(CNCC)C	143.274	4	8	5.58371	-54.6471	155.745	7.56673	24.22	24.22
C(=C)(C(=O)CC(=C)C=C)C	-10.261	183.612		C(C(CC(CC)C)O)(C)C	144.258	4	8	5.54562	-41.971	176.058	7.47561	25.24	25.24
C(=CC(=C(C)C)C)(N=C)C=C	-38.928	186.286		C(C(CC(NC)CC)C)(C)C	157.301	4	8	5.08579	-37.8701	195.614	7.55148	23.99	23.99
C(=C)(C(=CC(=NC)C=C)C)C	-38.928	186.309		C(C(CC(NC)CC)C)(C)C	157.301	4	8	5.08579	-37.8701	195.614	7.55148	24.54	24.54
C(=C)(C=CC(=C)C)C	-50.9563	141.255		C(CCC(C)C)(C)C	114.232	3	6	5.25247	-108.342	113.5	7.59493	25.9	25.9
C(=C)(C(=C)CC(=NC)C=C)C	-19.1145	185.902		C(C(CC(NC)CC)C)(C)C	157.301	4	8	5.08579	-37.8701	195.614	7.55148	27.82	27.82
C(=C)(C(=O)CC(=C)C(=C)C)C	-15.2586	192.43		C(C(CC(C(C)C)C)O)(C)C	158.285	4	8	5.05417	-37.871	203.54	7.32292	25.01	25.01
C(=C)(C(=C)CC(=C)C(=O)C)C	-15.2911	192.43		C(C(CC(C(O)C)C)C)(C)C	158.285	4	8	5.05417	-49.7832	204.291	7.67241	25.34	25.34
C(=C)(C(=CC(=C)C=C)N)C	-15.8141	201.719		C(C(CC(CC)C)N)(C)C	143.274	4	8	5.58371	-11.2153	174.16	7.50727	25.56	25.56
C(=C)(C(=C(CN(C)C)C)C)C	-45.5091	172.971		N(CC(C(C(C)C)C)C)(C)C	157.301	2	4	2.5429	-44.685	164.846	7.22437	25.22	25.22
C(=C(C(=CN(C)C)C)C)(C)C	-46.8715	173.618		N(CC(C(C(C)C)C)C)(C)C	157.301	2	4	2.5429	-44.685	164.846	7.22437	19.08	19.08
C(=C(C(=C)CN(C)C)C)(C)C	-45.5091	172.971		N(CC(C(C(C)C)C)C)(C)C	157.301	2	4	2.5429	-44.685	164.846	7.22437	24.47	24.47
C(=C)(C(=C(CN(C)C)O)C)C	-12.4962	234.158		N(CC(C(C(C)C)C)O)(C)C	159.273	2	4	2.51141	-51.9921	207.617	7.51808	28.44	28.44
C(=C(C(=CN(C)C)O)C)(C)C	-12.2422	248.447		N(CC(C(C(C)C)C)O)(C)C	159.273	2	4	2.51141	-51.9921	207.617	7.51808	21.36	21.36
C(=C(C(=O)CN(C)C)C)(C)C	-45.62	215.463		N(CC(C(C(C)C)C)O)(C)C	159.273	2	4	2.51141	-51.9921	207.617	7.51808	17.24	17.24
C(=C(C(=O)OC)CN(C)C)(C)C	-47.1913	216.727		N(CC(C(C)C)C(OC)O)(C)C	175.272	2	4	2.28217	-10.2261	210.861	7.51743	8.65	8.65
C(=C)(C(=CN(C)C)C)C	-64.7561	172.514		N(CC(C(C)C)C)(C)C	129.247	2	4	3.09485	-72.9025	139.2	6.66988	22.58	22.58
C(=C)(C(=C)CN(C)C)C	-72.3577	174.894		N(CC(C(C)C)C)(C)C	129.247	2	4	3.09485	-72.9025	139.2	6.66988	28.59	28.59
C(=C(C=O)CN(C)C)(C)C	-45.4768	208.629		N(CC(C(C)C)CO)(C)C	145.246	2	4	2.75395	-14.9962	189.701	7.12028	19.11	19.11
C(=C)(CC(=CN(C)C)C)C	-46.6813	171.268		N(CC(CC(C)C)C)(C)C	143.274	2	4	2.79185	-50.0115	154.694	6.80132	24.27	24.27
C(=CC(=CN(C)C)C)(C)C	-46.5798	168.46		N(CC(CC(C)C)C)(C)C	143.274	2	4	2.79185	-50.0115	154.694	6.80132	20.5	20.5
C(=C)(C=C(CN(C)C)C)C	-46.6813	171.177		N(CC(CC(C)C)C)(C)C	143.274	2	4	2.79185	-50.0115	154.694	6.80132	25.66	25.66
C(=CC(=C)CN(C)C)(C)C	-46.6813	171.177		N(CC(CC(C)C)C)(C)C	143.274	2	4	2.79185	-50.0115	154.694	6.80132	24.92	24.92
C(=C)(CC(=C)CN(C)C)C	-46.5691	170.764		N(CC(CC(C)C)C)(C)C	143.274	2	4	2.79185	-50.0115	154.694	6.80132	28.87	28.87
C(=C(C=C)C=CN=C)(C)C	-51.9028	175.319		C(C(CC)CCNC)(C)C	143.274	4	8	5.58371	-49.7887	158.224	7.1792	24.74	24.74
C(=CN(C)C)(C=C)C	-105.95	173.323		N(CC(CC)C)(C)C	115.22	2	4	3.47162	-106.502	105.95	7.10486	23.87	23.87
C(=C)(C=C)CN(C)C	-105.932	165.876		N(CC(CC)C)(C)C	115.22	2	4	3.47162	-106.502	105.95	7.10486	28.91	28.91
C(=CN(C)C)(C=NC)C	-20.5921	171.983		N(CC(CNC)C)(C)C	130.235	2	4	3.07137	-20.1775	150.185	7.1214	21.47	21.47
C(=C)(C=NC)CN(C)C	-20.0291	172.293		N(CC(CNC)C)(C)C	130.235	2	4	3.07137	-20.1775	150.185	7.1214	25.27	25.27
C(=CN=C)(CN(C)C)C	-20.0291	172.404		N(CC(CNC)C)(C)C	130.235	2	4	3.07137	-20.1775	150.185	7.1214	24.16	24.16
C(=CN(C)C)(CN=C)C	-20.0291	172.404		N(CC(CNC)C)(C)C	130.235	2	4	3.07137	-20.1775	150.185	7.1214	24.72	24.72
C(=C)(CN=C)CN(C)C	-19.5476	169.212		N(CC(CNC)C)(C)C	130.235	2	4	3.07137	-20.1775	150.185	7.1214	27.63	27.63
C(=NC)(CN(C=C)C)C	-19.947	172.783		N(CC)(CC(NC)C)C	130.235	2	4	3.07137	-45.7901	148.995	7.20343	24.09	24.09
C(=C)(C=COC)OC	-83.9651	132.882		C(OC)(CCOC)C	118.176	2	4	3.38478	-81.956	108.421	6.49611	31.86	31.86
C(=C(NN(C=C)C)C)(C)C	-10.4817	208.551		N(CC)(NC(C(C)C)C)C	144.262	2	4	2.77273	-65.3813	151.401	7.22887	22.22	22.22
C(=C)(N(C)C)C=CN(C)C	-31.4887	173.613		N(CCC(N(C)C)C)(C)C	144.262	2	4	2.77273	-51.416	163.436	6.66351	21.32	21.32
C(=C)(C=CN(C)C)C	-105.946	173.31		N(CCC(C)C)(C)C	115.22	2	4	3.47162	-106.496	105.957	7.94977	22.96	22.96
C(=C)(OC)CC(=C)OC	-81.3335	139.263		C(OC)(CC(OC)C)C	132.203	2	4	3.02565	-79.8152	119.758	6.77696	32.94	32.94
C(=C)(OC)C=C(OC)C	-87.6878	151.112		C(OC)(CC(OC)C)C	132.203	2	4	3.02565	-79.8152	119.758	6.77696	30.16	30.16
C(=O)(C=C)OC(C(=C)C)(C=C)C	-63.1901	192.889		C(C(C)C)(CC)(OC(CC)O)C	174.284	4	8	4.59021	-11.6378	197.513	7.38063	21.52	21.52
C(=NC=CN(C)C)(C)C	-20.4347	172.775		N(CCNC(C)C)(C)C	130.235	2	4	3.07137	-47.6717	148.896	7.96112	20.44	20.44
C(=CC(=O)OC(C)(C)C)(C)C	-67.4289	173.42		C(OC(CC(C)C)O)(C)(C)C	160.257	2	4	2.49599	-12.4645	176.322	6.64457	8.82	8.82
C(=C)(C=C)CN(N(C)C)C	-63.6474	166.839		N(N(CC(CC)C)C)(C)C	144.262	2	4	2.77273	-64.043	162.139	6.96654	29.41	29.41
C(OC(=O)CC(=C)C)(C)(C)C	-66.862	176.713		C(OC(CC(C)C)O)(C)(C)C	160.257	2	4	2.49599	-12.4645	176.322	6.64457	11.59	11.59
C(=COOC=C(C)C)(C)C	-80.626	173.041		C(COOCC(C)C)(C)C	146.23	2	4	2.73542	-66.3235	136.341	7.4947	30.91	30.91
C(=C)(COOC=C(C)C)C	-83.3926	170.253		C(COOCC(C)C)(C)C	146.23	2	4	2.73542	-66.3235	136.341	7.4947	29.47	29.47
C(=C)(COOCC(=C)C)C	-93.7445	164.78		C(COOCC(C)C)(C)C	146.23	2	4	2.73542	-66.3235	136.341	7.4947	28.03	28.03
C(=C)(COC=O)C	-70.2797	99.6987		C(COCO)(C)C	104.149	2	4	3.84065	-12.0006	141.331	7.93684	13.91	13.91
C(=COC=O)(C)C	-62.3061	107.257		C(COCO)(C)C	104.149	2	4	3.84065	-12.0006	141.331	7.93684	14.67	14.67
C(=COOC=C)(C)C	-86.821	136.659		C(COOCC)(C)C	118.176	2	4	3.38478	-65.684	112.878	7.67289	32.4	32.4
C(=C)(COOC=C)C	-85.1181	129.552		C(COOCC)(C)C	118.176	2	4	3.38478	-65.684	112.878	7.67289	30.96	30.96
C(=COC)(COC=C)C	-87.6799	151.27		C(COCC)(COC)C	132.203	2	4	3.02565	-83.9609	126.544	6.31223	32.6	32.6
C(=COC=C)(COC)C	-87.6799	151.27		C(COCC)(COC)C	132.203	2	4	3.02565	-83.9609	126.544	6.31223	32.6	32.6
C(=C)(COC=C)COC	-86.3896	144.338		C(COCC)(COC)C	132.203	2	4	3.02565	-83.9609	126.544	6.31223	31.95	31.95
C(=C)(C=CC(=NC)C)C	-52.0029	175.747		C(CCC(NC)C)(C)C	129.247	3	6	4.64227	-67.1448	142.987	7.21665	24.16	24.16
C(=C)(C=CC(=C)N)C	-30.4784	159.829		C(CCC(N)C)(C)C	115.22	3	6	5.20743	-29.8621	138.827	7.18082	25.29	25.29
C(=C)(C=CC(=N)C)C	-26.6417	147.353		C(CCC(N)C)(C)C	115.22	3	6	5.20743	-29.8621	138.827	7.18082	23.41	23.41
C(=O)(COC=C)C	-53.6621	137.373		C(COCC)(O)C	104.149	2	4	3.84065	-36.2908	139.509	6.96055	25.12	25.12
C(=COC)(C=O)C	-44.4664	145.812		C(CO)(COC)C	104.149	2	4	3.84065	-18.6998	148.06	7.06661	23.13	23.13
C(=C)(C=O)COC	-45.2307	137.354		C(CO)(COC)C	104.149	2	4	3.84065	-18.6998	148.06	7.06661	22.6	22.6
C(=C(C(=NC)C=C)C)(C=C)C	-38.9273	186.313		C(C(C(NC)CC)C)(CC)C	157.301	4	8	5.08579	-35.2475	195.64	7.79121	23.92	23.92
C(=C)C1(N(C=CN1C)C)C	-18.1135	175.744		N1(C(N(CC1)C)(CC)C)C	142.246	2	4	2.81203	-18.4687	158.563	7.91148	27.01	27.01
C(=C)(C=O)C	-67.2934	77.4735		C(CO)(C)C	74.123	2	4	5.39644	-103.512	105.013	5.36067	22.1	22.1
C(=C)(C=Cc1ccoc1)C	-85.0156	183.878		C(CCC1CCOC1)(C)C	142.242	4	8	5.62422	-17.8336	176.434	7.13664	24.02	24.02
C(=C)(C=Cc1cc(oc1)C)C	-84.6887	198.655		C(CCC1COC(C1)C)(C)C	156.269	4	8	5.11938	-19.3443	194.002	7.66344	23.67	23.67
C(=C1C=CN(C1)C)(C)C	-25.4166	177.171		N1(CCC(C(C)C)C1)C	127.231	2	4	3.14389	-40.5641	151.372	7.23888	20.23	20.23
C(=C)(C=CC(=C)NOC)C	-15.6773	168.061		C(CCC(NOC)C)(C)C	145.246	3	6	4.13092	-59.4346	144.744	7.15061	25.29	25.29
C(=C(C(=C)C=NC)C=C)(C)C	-38.9239	186.333		C(C(C(CNC)C)CC)(C)C	157.301	4	8	5.08579	-36.1398	195.759	7.55148	25.4	25.4
C(=C)(C(=C(C)C)C=C)CN=C	-32.2435	185.927		C(C(C(CNC)C)CC)(C)C	157.301	4	8	5.08579	-36.1398	195.759	7.55148	26.23	26.23
C(=C)(C(=C(C=NC)C)C=C)C	-38.9239	186.333		C(C(C(CNC)C)CC)(C)C	157.301	4	8	5.08579	-36.1398	195.759	7.55148	24.38	24.38
C(=C)(C(=C(CN=C)C)C=C)C	-32.2435	185.927		C(C(C(CNC)C)CC)(C)C	157.301	4	8	5.08579	-36.1398	195.759	7.55148	25.84	25.84
C(C(=COC)C)(C=O)(C)C	-65.8962	175.268		C(C(COC)C)(CO)(C)C	146.23	2	4	2.73542	-23.105	188.814	6.89394	24.62	24.62
C(=C)(N=C(C(=C)C(=C)C)C)C	-32.0909	185.683		C(C(C(NC(C)C)C)C)(C)C	157.301	4	8	5.08579	-11.1148	178.598	7.27451	25.6	25.6
C(=NC(=C)C(=C)C(=C)C)(C)C	-32.0909	185.683		C(C(C(NC(C)C)C)C)(C)C	157.301	4	8	5.08579	-11.1148	178.598	7.27451	26.14	26.14
C(=C(C(=C)N=C)C)(C=C)C	-51.8908	176.495		C(C(C(NC)C)C)(CC)C	143.274	4	8	5.58371	-54.1032	145.502	7.84556	24.69	24.69
C(=C)(C(=C(N=C)C)C)C=C	-51.8908	176.495		C(C(C(NC)C)C)(CC)C	143.274	4	8	5.58371	-54.1032	145.502	7.84556	25.98	25.98
C(=NC)(C(=C)C(=C)C=C)C	-51.8908	176.48		C(C(C(NC)C)C)(CC)C	143.274	4	8	5.58371	-54.1032	145.502	7.84556	27.73	27.73
C(=CN(C=C)C)(C)C	-105.866	172.975		C(CN(CC)C)(C)C	115.22	2	4	3.47162	-106.348	106.115	7.94977	23.12	23.12
C(=C)(CN(C=C)C)C	-105.846	161.089		C(CN(CC)C)(C)C	115.22	2	4	3.47162	-106.348	106.115	7.94977	26.97	26.97
C(=CN=C)(C(=C(C)C)C=C)C	-38.9239	186.311		C(C(C(CNC)C)CC)(C)C	157.301	4	8	5.08579	-36.1398	195.759	7.55148	24.36	24.36
C(=C)(C=CC(=CN=C)COC)OC	-45.1043	210.399		C(CCC(OC)C)(CNC)COC	189.299	4	8	4.22612	-47.0798	216.556	7.56004	25.76	25.76
C(=C)(C=CC(=COC)C=NC)OC	-45.1315	210.555		C(CCC(OC)C)(CNC)COC	189.299	4	8	4.22612	-47.0798	216.556	7.56004	27.32	27.32
C(=COC)(C=CC(=C)OC)CN=C	-45.1043	210.399		C(CCC(OC)C)(CNC)COC	189.299	4	8	4.22612	-47.0798	216.556	7.56004	28.16	28.16
C(=C)(C(=C(C=C)OOC)C)C=C	-70.0555	198.965		C(C(C(CC)OOC)C)(CC)C	174.284	4	8	4.59021	-50.5125	177.115	7.52866	27.78	27.78
C(C(=COC)C)(C=N)(C)C	-44.7996	157.07		C(C(COC)C)(CN)(C)C	145.246	2	4	2.75395	-72.0134	178.443	7.12768	27.34	27.34
C(=C)(C(C=C)(N)C)COC	-37.9898	177.084		C(C(COC)C)(CC)(N)C	145.246	2	4	2.75395	-73.7468	178.457	7.66978	31.91	31.91
C(=COC)(C(C=C)(N)C)C	-13.8811	187.921		C(C(COC)C)(CC)(N)C	145.246	2	4	2.75395	-73.7468	178.457	7.66978	32.96	32.96
C(C(=C)COC)(C=N)(C)C	-44.6971	159.873		C(C(COC)C)(CN)(C)C	145.246	2	4	2.75395	-72.0134	178.443	7.12768	26.65	26.65
C(C(=C)COC)(C=O)(C)C	-62.2377	172.135		C(C(COC)C)(CO)(C)C	146.23	2	4	2.73542	-23.105	188.814	6.89394	23.93	23.93
C(C(=N)COC)(C=C)(C)C	-59.9648	159.848		C(C(COC)N)(CC)(C)C	145.246	2	4	2.75395	-68.2169	173.957	7.12768	26.21	26.21
C(C(=COC)N)(C=C)(C)C	-62.2794	188.015		C(C(COC)N)(CC)(C)C	145.246	2	4	2.75395	-68.2169	173.957	7.12768	29.99	29.99
C(=C(C=COC)C)(COC)N	-17.224	202.868		C(C(COC)N)(CCOC)C	161.245	2	4	2.4807	-18.5813	196.424	7.41506	25.46	25.46
C(=COC)(C(C=C)(OC)C)N	-18.3847	200.666		C(C(COC)N)(OC)(CC)C	161.245	2	4	2.4807	-18.9173	179.591	7.41012	29.45	29.45
C(=N)(C(C=C)(OC)C)COC	-14.4514	197.193		C(C(COC)N)(OC)(CC)C	161.245	2	4	2.4807	-18.9173	179.591	7.41012	26.79	26.79
C(C(=N)COC)(OC=C)(C)C	-14.5176	191.763		C(C(COC)N)(OCC)(C)C	161.245	2	4	2.4807	-19.2578	179.617	6.73098	28.55	28.55
C(C(=COC)N)(OC=C)(C)C	-18.6699	200.65		C(C(COC)N)(OCC)(C)C	161.245	2	4	2.4807	-19.2578	179.617	6.73098	31.22	31.22
C(C(=C)N(C(=C)C)C)(C)(C)C	-44.6883	173.182		C(C(N(C(C)C)C)C)(C)(C)C	157.301	2	4	2.5429	-43.3163	160.033	6.35454	26.2	26.2
C(=C(C(C=N)(C)C)N(C)C)(C)C	-24.6006	222.436		C(C(N(C)C)C(C)C)(CN)(C)C	172.316	2	4	2.32132	-24.1383	196.792	6.99481	21.14	21.14
C(=C)(C(=CON)C)C	-14.1177	131.829		C(C(CON)C)(C)C	117.192	2	4	3.4132	-44.7921	97.7692	6.93778	30.15	30.15
C(C=N)(C(C(=C)C)N(C)C)(C)C	-12.2274	222.425		C(C(N(C)C)C(C)C)(CN)(C)C	172.316	2	4	2.32132	-24.1383	196.792	6.99481	25.68	25.68
C(C(=C)N(C)C)(N=C)(C)C	-19.8627	156.085		C(C(N(C)C)C)(NC)(C)C	144.262	2	4	2.77273	-48.0618	161.823	6.99621	25.73	25.73
C(C(=CC(=O)C)N(C)C)(C)(C)C	-37.0933	218.991		C(C(N(C)C)CC(O)C)(C)(C)C	173.3	2	4	2.30814	-16.9359	212.607	7.52469	14.53	14.53
C(C(=CC(=C)O)N(C)C)(C)(C)C	-17.9574	234.528		C(C(N(C)C)CC(O)C)(C)(C)C	173.3	2	4	2.30814	-16.9359	212.607	7.52469	22.03	22.03
C(C(=C)N(C=C)C)(C)(C)C	-45.9851	165.041		C(C(N(CC)C)C)(C)(C)C	143.274	2	4	2.79185	-47.7144	155.109	6.84542	26.41	26.41
C(C(=NC=C)N(C)C)(C)(C)C	-20.1467	179.591		C(C(N(C)C)NCC)(C)(C)C	158.289	2	4	2.52702	-12.5435	193.12	6.90694	13.53	13.53
C(C(=CC(=C)C)N(O)C)(C)(C)C	-35.4069	211.451		C(C(N(O)C)CC(C)C)(C)(C)C	173.3	2	4	2.30814	-55.8294	209.949	7.01684	20.3	20.3
C(C(=C)N)(C=C)(C)C	-27.9918	132.801		C(C(N)C)(CC)(C)C	115.22	2	4	3.47162	-48.646	133.063	7.10486	28.98	28.98
C(C(=N)C)(OC(=C)C)(C)C	-33.7621	159.855		C(C(N)C)(OC(C)C)(C)C	145.246	2	4	2.75395	-71.6641	161.665	6.84511	27.37	27.37
C(C(=C)N)(OC(=C)C)(C)C	-46.7082	174.662		C(C(N)C)(OC(C)C)(C)C	145.246	2	4	2.75395	-71.6641	161.665	6.84511	29.98	29.98
C(C(=N)C)(OC=C)(C)C	-43.9378	135.354		C(C(N)C)(OCC)(C)C	131.219	2	4	3.04834	-67.8542	153.507	6.96337	28.05	28.05
C(C=C)(C(=N)C)(OC)C	-43.9209	132.916		C(C(N)C)(OC)(CC)C	131.219	2	4	3.04834	-67.8756	153.487	7.5912	26.28	26.28
C(C(=NC(=C)C)C)(C)(C)C	-22.712	164.114		C(C(NC(C)C)C)(C)(C)C	143.274	2	4	2.79185	-13.6858	145.023	6.46261	22.61	22.61
C(C(=C)N=C(C)C)(C)(C)C	-22.712	164.114		C(C(NC(C)C)C)(C)(C)C	143.274	2	4	2.79185	-13.6858	145.023	6.46261	23.6	23.6
C(C(=C)NC(=C)C)(C)(C)C	-50.8182	166.792		C(C(NC(C)C)C)(C)(C)C	143.274	2	4	2.79185	-13.6858	145.023	6.46261	26.31	26.31
C(C(O)(C)C)(N=C(C=C)C)(C)C	-32.5266	210.892		C(C(NC(CC)C)(C)C)(O)(C)C	173.3	2	4	2.30814	-69.612	228.988	7.14448	23.7	23.7
C(C=C)(C(=NC)C)(C)C	-22.598	152.066		C(C(NC)C)(CC)(C)C	129.247	2	4	3.09485	-56.5539	143.177	7.1516	26.68	26.68
C(=C)(C=CC(=NC=C)C)C	-51.9269	175.205		C(CCC(NCC)C)(C)C	143.274	4	8	5.58371	-42.2512	155.78	7.1792	24.44	24.44
C(C(=C)N=C)(C)(C)C	-35.5421	136.707		C(C(NC)C)(C)(C)C	115.22	2	4	3.47162	-66.9226	118.83	6.99646	25.86	25.86
C(=C)(C=CC(=C)N=C)C	-61.4193	171.664		C(CCC(NC)C)(C)C	129.247	4	8	6.1897	-67.1448	142.987	7.21665	25.28	25.28
C(=C)(C=CC(=C)N(C=C)C)C	-45.8252	192.955		C(CCC(N(CC)C)C)(C)C	157.301	4	8	5.08579	-47.392	172.943	7.09578	25.09	25.09
C(=C)(C(=C)C(=COC)C=C)C	-46.6273	188.921		C(C(C(CC)COC)C)(C)C	158.285	4	8	5.05417	-84.8391	176.028	7.36927	30.16	30.16
C(=C)(C(=C)C(=N)C=C)C	-13.5651	178.61		C(C(C(CC)N)C)(C)C	129.247	4	8	6.1897	-38.7502	151.294	7.5279	26.45	26.45
C(=C)(C(=C(C=C)N)C)C=C	-15.8058	201.718		C(C(C(CC)N)C)(CC)C	143.274	4	8	5.58371	-11.2167	174.155	7.75659	25.74	25.74
C(=C)(C(=C)C(=NC=C)C)C	-51.9139	176.355		C(C(C(NCC)C)C)(C)C	143.274	4	8	5.58371	-36.5452	154.061	7.50727	26	26
C(C(=NC=C)C)(C)(C)C	-22.6057	152.228		C(C(NCC)C)(C)(C)C	129.247	2	4	3.09485	-53.6398	142.576	6.95331	23.11	23.11
C(=C)(C(C(=O)C)C(=C)C=C)C	-16.5156	192.518		C(C(C(O)C)C(CC)C)(C)C	158.285	4	8	5.05417	-25.3079	203.678	7.72305	25.85	25.85
C(=C)(C(=C)C(=C)C=C)OC	-49.7199	170.524		C(C(C(OC)C)C)(CC)C	144.258	4	8	5.54562	-86.0586	153.471	7.70449	30.36	30.36
C(C(C=C)(C=C)OC)(C)(C)C	-92.6539	171.204		C(C(OC)(CC)CC)(C)(C)C	158.285	2	4	2.52709	-86.1157	171.878	7.74058	31.58	31.58
C(=C)(C(=O)C)C	-61.7454	101.129		C(C(O)C)(C)C	88.15	2	4	4.53772	-27.8355	111.649	7.17357	20.6	20.6
C(C(=C)NOC(=C)C)(C)(C)C	-56.2871	175.083		C(C(NOC(C)C)C)(C)(C)C	159.273	2	4	2.51141	-71.2083	156.217	6.78748	29.02	29.02
C(C(=C)NOC=C)(C)(C)C	-34.5664	159.474		C(C(NOCC)C)(C)(C)C	145.246	2	4	2.75395	-71.1498	144.688	6.90395	29.74	29.74
C(C(=C)O)(C=C)(C)C	-35.3784	146.413		C(C(O)C)(CC)(C)C	116.204	2	4	3.44222	-46.651	136.719	7.04659	33.34	33.34
C(C(=O)C)(C=C)(C)C	-69.1838	130.159		C(C(O)C)(CC)(C)C	116.204	2	4	3.44222	-46.651	136.719	7.04659	22.31	22.31
C(C(=O)C)(C=C)(CN(C)C)C	-45.5381	206.136		C(C(O)C)(CC)(CN(C)C)C	159.273	2	4	2.51141	-51.0956	208.186	7.62182	22.16	22.16
C(C(=C)O)(C=C)(CN(C)C)C	-12.2164	219.95		C(C(O)C)(CC)(CN(C)C)C	159.273	2	4	2.51141	-51.0956	208.186	7.62182	33.23	33.23
C(C(=O)C)(OC(=C)C)(C)C	-62.2266	170.507		C(C(O)C)(OC(C)C)(C)C	146.23	2	4	2.73542	-44.0147	176.302	6.27547	24.72	24.72
C(C(=O)C)(N(C=C)C)(C)C	-45.4207	192.702		C(C(O)C)(N(CC)C)(C)C	145.246	2	4	2.75395	-11.5607	186.99	7.19504	20.88	20.88
C(C(=C)O)(OC(=C)C)(C)C	-19.7774	173.266		C(C(O)C)(OC(C)C)(C)C	146.23	2	4	2.73542	-44.0147	176.302	6.27547	34.63	34.63
C(=C)(C(C=C)(OC)C)O	-65.4359	158.868		C(C(O)C)(OC)(CC)C	132.203	2	4	3.02565	-42.5702	167.441	7.49799	33.21	33.21
C(C=C)(C(=O)C)(OC)C	-52.4669	159.316		C(C(O)C)(OC)(CC)C	132.203	2	4	3.02565	-42.5702	167.441	7.49799	23.49	23.49
C(C(=O)C)(OC=C)(C)C	-52.4983	155.508		C(C(O)C)(OCC)(C)C	132.203	2	4	3.02565	-39.5587	167.42	6.76971	25.38	25.38
C(=C)(C(OC=C)(C)C)O	-65.3439	158.897		C(C(O)C)(OCC)(C)C	132.203	2	4	3.02565	-39.5587	167.42	6.76971	35.25	35.25
C(C(=C)OC(=C)C)(N)(C)C	-80.5859	174.679		C(C(OC(C)C)C)(N)(C)C	145.246	2	4	2.75395	-68.0889	161.658	6.71185	34.7	34.7
C(C(=O)OC(=C)C)(C)(C)C	-68.3155	146.711		C(C(OC(C)C)O)(C)(C)C	146.23	2	4	2.73542	-23.4704	163.45	6.50452	14.18	14.18
C(C(=C)OC(=C)OC)(C)(C)C	-71.5325	163.07		C(C(OC(OC)C)C)(C)(C)C	160.257	2	4	2.49599	-71.8052	160.513	7.12307	36.56	36.56
C(=C)(C(=C)OC)C	-72.8652	94.6585		C(C(OC)C)(C)C	102.177	2	4	3.91478	-96.4612	77.0332	6.85689	30.63	30.63
C(=CC(C(=C)OC)(O)C)(C)C	-20.6921	214.075		C(C(OC)C)(CC(C)C)(O)C	160.257	2	4	2.49599	-34.3002	194.507	7.48652	29.54	29.54
C(C(=C)OC)(CC(=C)C)(O)C	-15.7011	213.862		C(C(OC)C)(CC(C)C)(O)C	160.257	2	4	2.49599	-34.3002	194.507	7.48652	31.51	31.51
C(C(=C)OC)(C=O)(C)C	-52.4658	155.514		C(C(OC)C)(CO)(C)C	132.203	2	4	3.02565	-61.9454	170.418	6.90573	25.67	25.67
C(=C)(C(=O)C)OC	-45.6201	136.696		C(C(OC)C)(O)C	104.149	2	4	3.84065	-42.0116	142.739	7.41211	23.83	23.83
C(C(=CC(=N)C)OC)(C)(C)C	-40.5045	179.81		C(C(OC)CC(N)C)(C)(C)C	159.273	2	4	2.51141	-68.3473	185.266	7.53202	24.55	24.55
C(C(=CC(=O)C)OC)(C)(C)C	-69.6733	201.993		C(C(OC)CC(O)C)(C)(C)C	160.257	2	4	2.49599	-44.0717	193.661	7.38592	20.91	20.91
C(C(=CC(=C)N)OC)(C)(C)C	-42.4272	199.066		C(C(OC)CC(N)C)(C)(C)C	159.273	2	4	2.51141	-68.3473	185.266	7.53202	24.27	24.27
C(C(=CC(=C)O)OC)(C)(C)C	-36.9247	216.137		C(C(OC)CC(O)C)(C)(C)C	160.257	2	4	2.49599	-44.0717	193.661	7.38592	28.31	28.31
C(=C)(C(=C)OC)OC	-83.9269	119.907		C(C(OC)C)(OC)C	118.176	2	4	3.38478	-79.8432	105.427	6.50811	32.54	32.54
C(=C(C=C)OC)(C)C	-82.0092	125.721		C(C(OC)CC)(C)C	116.204	2	4	3.44222	-92.6521	102.887	6.93893	27.94	27.94
C(=C(OC)C=NC)(OC)C	-39.3522	188.613		C(C(OC)CNC)(OC)C	147.218	2	4	2.71706	-12.5738	162.446	7.35145	26.61	26.61
C(=C(OC)CN=C)(OC)C	-39.3993	189.8		C(C(OC)CNC)(OC)C	147.218	2	4	2.71706	-12.5738	162.446	7.35145	28.01	28.01
C(C(=C)N(C)C)(C(=O)OC)(C)C	-45.8286	196.249		C(C(OC)O)(C(N(C)C)C)(C)C	175.272	2	4	2.28217	-10.5948	210.714	7.47781	10.5	10.5
C(=C)(C(=O)OC)C	-68.2514	98.3442		C(C(OC)O)(C)C	104.149	2	4	3.84065	-31.5714	144.644	6.96055	11.94	11.94
C(=C)(N(C(C(=O)OC)(C)C)C)C	-46.2906	190.863		C(C(OC)O)(N(C(C)C)C)(C)C	175.272	2	4	2.28217	-10.4878	210.571	7.01483	11.68	11.68
C(C(C(=O)C)(C)C)(OC=C)(C)C	-61.076	210.461		C(C(OCC)(C)C)(C(O)C)(C)C	174.284	2	4	2.2951	-34.1669	203.749	6.69469	24.25	24.25
C(=CC1=C(OCO1)C)(C)C	-23.2247	203.154		C(CC1C(OCO1)C)(C)C	144.214	2	4	2.77366	-67.9103	152.464	7.24976	26.95	26.95
C(=C)(CC1=C(OCO1)C)C	-24.3572	203.378		C(CC1C(OCO1)C)(C)C	144.214	2	4	2.77366	-67.9103	152.464	7.24976	30.6	30.6
C(=C)(C(C(OC=C)(C)C)(C)C)O	-39.8168	212.99		C(C(OCC)(C)C)(C(O)C)(C)C	174.284	2	4	2.2951	-34.1669	203.749	6.69469	35.62	35.62
C(C(OC=C)(C)C)(C=O)(C)C	-67.308	183.411		C(C(OCC)(C)C)(CO)(C)C	160.257	2	4	2.49599	-30.89	197.563	7.81541	26.07	26.07
C(=C(OC=C)C)(C)C	-81.8648	125.686		C(C(OCC)C)(C)C	116.204	2	4	3.44222	-92.6834	102.887	6.80965	32.12	32.12
C(C(=C)OC=C)(N)(C)C	-58.2382	167.417		C(C(OCC)C)(N)(C)C	131.219	2	4	3.04834	-67.91	153.542	7.06386	35.09	35.09
C(C(=C)OC=C)(O)(C)C	-25.6834	162.863		C(C(OCC)C)(O)(C)C	132.203	2	4	3.02565	-46.3803	168.162	6.76971	34.51	34.51
C(C(=O)OC=C)(CN(C)C)(C)C	-46.3141	198.462		C(C(OCC)O)(CN(C)C)(C)C	175.272	2	4	2.28217	-10.6647	210.891	6.94846	14.99	14.99
C(=C)C(=O)C	-67.0225	77.4735		C(CC)(O)C	74.123	2	4	5.39644	-80.8136	102.375	7.38293	21.51	21.51
C(=C)(C=C)O	-34.3059	125.466		C(CC)(O)C	74.123	2	4	5.39644	-80.8136	102.375	7.38293	30.9	30.9
C(=C)(C=C)OCOC	-83.9439	123.093		C(CC)(OCOC)C	118.176	2	4	3.38478	-84.1007	107.501	6.65996	31.58	31.58
C(=C)(C=C)OOC	-84.7067	98.2937		C(CC)(OOC)C	104.149	2	4	3.84065	-70.3568	91.229	6.50076	30.9	30.9
C(C1(C(=C)C)OC=CO1)(C)(C)C	-48.1889	204.975		C(C1(C(C)C)OCCO1)(C)(C)C	172.268	2	4	2.32196	-74.3401	175.804	7.66204	35.28	35.28
C(C1(C=C)OC=C(O1)C)(C)(C)C	-48.1866	204.975		C(C1(CC)OCC(O1)C)(C)(C)C	172.268	2	4	2.32196	-74.3396	175.809	7.27517	34.68	34.68
C1(=C)COC(C(C)(C)C)(C=C)O1	-67.559	199.592		C(C1(CC)OCC(O1)C)(C)(C)C	172.268	2	4	2.32196	-74.3396	175.809	7.27517	33.43	33.43
C(C1(C=NC=CO1)C)(C)(C)C	-11.618	176.124		C(C1(OCCNC1)C)(C)(C)C	157.257	2	4	2.54361	-10.8863	176.561	7.06275	25.73	25.73
C(c1c(c(co1)C)C)(C)(C)C	-106.678	187.956		C(C1C(C(CO1)C)C)(C)(C)C	156.269	2	4	2.55969	-22.9057	172.449	7.69803	16.48	16.48
C(C1C(=C)C(=C)CO1)(C)(C)C	-17.5912	177.417		C(C1C(C(CO1)C)C)(C)(C)C	156.269	2	4	2.55969	-22.9057	172.449	7.69803	30.06	30.06
C(=C)(C1C(=C(CO1)C)C)C	-28.5902	174.771		C(C1C(C(CO1)C)C)(C)C	142.242	2	4	2.81211	-22.5422	159.43	7.74585	26.26	26.26
C(=C1C(=C(CO1)C)C)(C)C	-14.4018	195.687		C(C1C(C(CO1)C)C)(C)C	142.242	2	4	2.81211	-22.5422	159.43	7.74585	24.1	24.1
C(=C)C(=O)COC	-53.6578	137.354		C(CC)(COC)O	104.149	2	4	3.84065	-41.9734	141.375	7.15754	22.64	22.64
C(c1c(cco1)C)(C)(C)C	-97.5138	168.098		C(C1C(CCO1)C)(C)(C)C	142.242	2	4	2.81211	-22.9617	169.879	7.54553	16.72	16.72
C(C1=C(C(=C)OC1)C)(OC)(C)C	-52.106	206.517		C(C1C(C(OC1)C)C)(OC)(C)C	172.268	2	4	2.32196	-74.3536	175.832	7.73442	26.36	26.36
C(c1c(c(oc1)C)C)(OC)(C)C	-66.1666	191.326		C(C1C(C(OC1)C)C)(OC)(C)C	172.268	2	4	2.32196	-74.3536	175.832	7.73442	17.32	17.32
C(C1=C(C=C)OCO1)(C)(C)C	-13.0347	201.004		C(C1C(CC)OCO1)(C)(C)C	158.241	2	4	2.52779	-71.0259	172.866	7.12036	27.8	27.8
C(C1C(=C)C=CO1)(C)(C)C	-29.3221	177.373		C(C1C(CCO1)C)(C)(C)C	142.242	2	4	2.81211	-22.9617	169.879	7.54553	31.85	31.85
C(=COC)(C=C)COC	-87.6744	151.257		C(CC)(COC)COC	132.203	2	4	3.02565	-83.7395	126.544	7.72615	30.4	30.4
C(C1=C(C=COC1)C)(C)(C)C	-17.9751	198.423		C(C1C(CCOC1)C)(C)(C)C	156.269	2	4	2.55969	-36.8155	174.758	7.48936	24.75	24.75
C(c1c(coc1)C)(C)(C)C	-97.5177	167.139		C(C1C(COC1)C)(C)(C)C	142.242	2	4	2.81211	-23.0057	169.879	7.37131	16.49	16.49
C(C1=COCC1=C)(C)(C)C	-28.851	177.387		C(C1C(COC1)C)(C)(C)C	142.242	2	4	2.81211	-23.0057	169.879	7.37131	31.67	31.67
C1(=COCC1=C(C)C)C	-16.3013	156.704		C(C1C(COC1)C)(C)C	128.215	2	4	3.11976	-21.5447	126.904	7.4454	26.69	26.69
C1(=C)C(=C(C)C)COC1	-28.7869	143.464		C(C1C(COC1)C)(C)C	128.215	2	4	3.11976	-21.5447	126.904	7.4454	25.07	25.07
C(=C)(C1=C(COC1)C)C	-28.7869	143.464		C(C1C(COC1)C)(C)C	128.215	2	4	3.11976	-21.5447	126.904	7.4454	24.69	24.69
C(c1c(occ1)C)(C)(C)C	-97.5205	168.219		C(C1C(OCC1)C)(C)(C)C	142.242	2	4	2.81211	-23.0358	169.879	7.54553	16.45	16.45
C1(=C(CC(=C(C)C)C1)N)C	-12.529	202.948		C(C1CC(C(C1)C)N)(C)C	141.258	2	4	2.8317	-19.7546	172.827	7.93958	19.39	19.39
C(c1cc(n(c1)C)C)(C)(C)C	-38.9698	195.205		C(C1CC(N(C1)C)C)(C)(C)C	155.285	2	4	2.57591	-21.2947	163.39	7.6634	14.16	14.16
C(c1ccc(o1)C)(C)(C)C	-97.5164	168.219		C(C1CCC(O1)C)(C)(C)C	142.242	2	4	2.81211	-22.9915	169.879	7.37131	17.07	17.07
C(c1ccc(o1)C)(OC)(C)C	-70.1234	187.762		C(C1CCC(O1)C)(OC)(C)C	158.241	2	4	2.52779	-71.008	177.126	7.37146	18.03	18.03
C(c1ccn(c1)C)(C)(C)C	-52.014	183.93		C(C1CCN(C1)C)(C)(C)C	141.258	2	4	2.8317	-28.1628	158.84	7.13127	13.69	13.69
C(=C(C=C)N=C(C=C)C)(C)C	-38.9558	186.128		C(C(CC)NC(CC)C)(C)C	157.301	4	8	5.08579	-13.6873	181.067	7.43019	24.48	24.48
C(c1ccoc1)(C)(C)C	-94.8676	134.378		C(C1CCOC1)(C)(C)C	128.215	2	4	3.11976	-22.3771	130.066	6.8928	17.16	17.16
C(=C1COC=C1)(C)C	-35.9337	136.461		C(C1CCOC1)(C)C	114.188	2	4	3.503	-29.8264	130.139	7.0246	27.27	27.27
C(=C1COC(=C(OC1)C)C)(C)C	-38.7555	229.36		C(C1COC(C(OC1)C)C)(C)C	172.268	2	4	2.32196	-71.1451	185.967	7.07373	29.36	29.36
C(=C1C=COO1)(C)C	-21.8364	150.774		C(C1CCOO1)(C)C	116.16	2	4	3.44353	-60.1728	123.24	6.6399	29.06	29.06
C(c1coc(c1)C)(C)(C)C	-97.5198	168.219		C(C1COC(C1)C)(C)(C)C	142.242	2	4	2.81211	-23.0287	169.879	7.54553	17.42	17.42
C(C1=COC(=C)C1)(C)(C)C	-28.8541	177.392		C(C1COC(C1)C)(C)(C)C	142.242	2	4	2.81211	-23.0287	169.879	7.54553	34.98	34.98
C(C1=CC(=C)OC1)(C)(C)C	-28.8541	177.387		C(C1COC(C1)C)(C)(C)C	142.242	2	4	2.81211	-23.0287	169.879	7.54553	25.88	25.88
C(=O)(C=C(COC)C)C	-14.8712	175.718		C(CC(COC)C)(O)C	132.203	2	4	3.02565	-41.1727	171.628	7.60886	19.07	19.07
C(=O)(CC(=COC)C)C	-14.8712	175.657		C(CC(COC)C)(O)C	132.203	2	4	3.02565	-41.1727	171.628	7.60886	22.34	22.34
C(=C)(CC(=O)C)COC	-15.6669	178.19		C(CC(COC)C)(O)C	132.203	2	4	3.02565	-41.1727	171.628	7.60886	21.61	21.61
C(=C)(CC(=N)COC)C	-33.4187	159.216		C(CC(COC)N)(C)C	131.219	2	4	3.04834	-67.9432	165.474	7.21938	24.73	24.73
C(=CC(=N)COC)(C)C	-33.4325	159.87		C(CC(COC)N)(C)C	131.219	2	4	3.04834	-67.9432	165.474	7.21938	21.51	21.51
C(=C)(C=C(COC)O)C	-16.7105	172.351		C(CC(COC)O)(C)C	132.203	2	4	3.02565	-15.2384	170.43	7.08436	28.97	28.97
C(=C)(C(=C(C)C)C)NOC	-15.8215	159.929		C(C(C(NOC)C)C)(C)C	145.246	2	4	2.75395	-71.1858	144.694	7.49831	23.3	23.3
C(=C)(CC(=COC)O)C	-15.6721	177.888		C(CC(COC)O)(C)C	132.203	2	4	3.02565	-15.2384	170.43	7.08436	32.27	32.27
C(=C)(CC(=O)COC)C	-15.6954	178.19		C(CC(COC)O)(C)C	132.203	2	4	3.02565	-15.2384	170.43	7.08436	22.11	22.11
C(=CC(=O)COC)(C)C	-14.8945	175.718		C(CC(COC)O)(C)C	132.203	2	4	3.02565	-15.2384	170.43	7.08436	19.2	19.2
C(=C)(C(=C(NOC)C)C)C	-40.675	159.929		C(C(C(NOC)C)C)(C)C	145.246	2	4	2.75395	-71.1858	144.694	7.49831	23.79	23.79
C(=C(C(=C)N)C)(C)C	-37.6821	137.123		C(C(C(N)C)C)(C)C	115.22	2	4	3.47162	-48.2426	132.466	7.48577	23.29	23.29
C(=C)(C(=C(N)C)C)C	-27.6086	137.123		C(C(C(N)C)C)(C)C	115.22	2	4	3.47162	-48.2426	132.466	7.48577	23.79	23.79
C(=C)(C(=N)C=C)C=C	-26.7185	158.793		C(C(CC)N)(CC)C	115.22	4	8	6.94324	-49.3689	140.22	7.6211	26.67	26.67
C(=C)(C=CC(=C)C=NC)C	-51.9003	176.772		C(CCC(CNC)C)(C)C	143.274	4	8	5.58371	-67.394	161.267	6.99798	25.1	25.1
C(=C)(C=CC(=CN=C)C)C	-51.9003	175.332		C(CCC(CNC)C)(C)C	143.274	4	8	5.58371	-67.394	161.267	6.99798	24.16	24.16
C(=C)(C=CC(=C)CN=C)C	-51.8725	176.502		C(CCC(CNC)C)(C)C	143.274	4	8	5.58371	-67.394	161.267	6.99798	26.06	26.06
C(=C)(N(C(=C)C=CC(=N)C)C)C	-22.6777	257.445		C(CCC(N(C(C)C)C)C)(N)C	172.316	4	8	4.64263	-24.0419	197.218	7.36618	22.73	22.73
C(=C)(C=CC(=COC=C)C)C	-57.1076	188.133		C(CCC(COCC)C)(C)C	158.285	4	8	5.05417	-85.7301	175.407	6.44591	28.69	28.69
C(=C)(C=CC(=C)COC=C)C	-46.9103	188.901		C(CCC(COCC)C)(C)C	158.285	4	8	5.05417	-85.7301	175.407	6.44591	28.08	28.08
C(=C(C=C)N)(C)C	-39.1625	123.918		C(C(CC)N)(C)C	101.193	2	4	3.95284	-57.2065	111.592	7.24642	23.66	23.66
C(=COC)(C(=COC)C)C	-78.7998	172.721		C(C(COC)C)(COC)C	146.23	2	4	2.73542	-79.2095	142.364	6.65522	31.23	31.23
C(=C)(C(=C)COC)COC	-74.3013	163.645		C(C(COC)C)(COC)C	146.23	2	4	2.73542	-79.2095	142.364	6.65522	29.52	29.52
C(=C)(C(=COC)C)COC	-74.6932	171.114		C(C(COC)C)(COC)C	146.23	2	4	2.73542	-79.2095	142.364	6.65522	30.27	30.27
C(=C)(C(=COOC)C)C	-85.7205	151.245		C(C(COOC)C)(C)C	132.203	2	4	3.02565	-69.7469	119.618	6.06615	30.15	30.15
C(=C)(C(=C)COOC)C	-87.2073	139.296		C(C(COOC)C)(C)C	132.203	2	4	3.02565	-69.7469	119.618	6.06615	28.72	28.72
C(=C(N=C(C)C)C)(C)C	-18.8564	165.557		C(C(NC(C)C)C)(C)C	129.247	2	4	3.09485	-36.2039	142.658	6.77316	21.02	21.02
C(=C)(NC(=C(C)C)C)C	-75.2609	165.006		C(C(NC(C)C)C)(C)C	129.247	2	4	3.09485	-36.2039	142.658	6.77316	22.03	22.03
C(=C)(C(=NC=C)C)C	-56.8754	157.899		C(C(NCC)C)(C)C	115.22	3	6	5.20743	-62.696	124.469	7.18082	24.72	24.72
C(=C)(C=CN(C=C)C)C	-63.5558	174.794		C(CCN(CC)C)(C)C	129.247	3	6	4.64227	-74.6093	138.672	7.97386	23.61	23.61
C(=C)(OC=COC(=C)C)C	-90.5251	166.861		C(OCCOC(C)C)(C)C	146.23	3	6	4.10313	-78.9813	142.411	7.49325	34.26	34.26
C(=C)(OC=COC=C)C	-85.6762	139.869		C(OCCOCC)(C)C	132.203	3	6	4.53847	-84.2268	126.63	7.68147	34.35	34.35
C(OC=COC=CN=C)(C)(C)C	-44.8775	192.833		C(OCCOCCNC)(C)(C)C	175.272	3	6	3.42325	-12.9764	202.332	7.8105	30.63	30.63
C(=CN=C)(OCOC=C)C	-36.3193	174.808		C(OCOCC)(CNC)C	147.218	3	6	4.07559	-12.6386	172.085	7.00961	29.07	29.07
C(=C)(C=NC)OCOC=C	-36.3193	174.805		C(OCOCC)(CNC)C	147.218	3	6	4.07559	-12.6386	172.085	7.00961	30.4	30.4
C(=C)(OCOC=C)CN=C	-36.4572	180.652		C(OCOCC)(CNC)C	147.218	3	6	4.07559	-12.6386	172.085	7.00961	31.41	31.41
C(=C)(OCOC=CN=C)C	-36.3297	174.808		C(OCOCCNC)(C)C	147.218	3	6	4.07559	-12.4626	172.074	7.92516	29.12	29.12
C(=C)(OCc1occc1)C	-23.8865	183.24		C(OCC1OCCC1)(C)C	144.214	3	6	4.16048	-65.6487	162.105	6.92818	23.72	23.72
C(Oc1ccccc1)(C)(C)C	-18.6313	193.258		C(OC1CCCCC1)(C)(C)C	156.269	3	6	3.83953	-40.0035	194.159	7.7654	15.79	15.79
C(=C(C(=O)C=C)OC)(C)C	-31.1417	204.511		C(C(C(CC)O)OC)(C)C	146.23	3	6	4.10313	-44.8733	177.293	7.49419	23.56	23.56
C(=C)(C(C(=O)C=C)OC)C	-49.4752	205.369		C(C(C(CC)O)OC)(C)C	146.23	3	6	4.10313	-44.8733	177.293	7.49419	25.03	25.03
C(=C)(C(=CC(=O)C)OC)C	-31.1097	204.511		C(CC(C(C)C)OC)(O)C	146.23	3	6	4.10313	-32.6237	188.535	7.49419	22.34	22.34
C(=C)(C=C(C(=C)C)OC)O	-12.0121	206.116		C(CC(C(C)C)OC)(O)C	146.23	3	6	4.10313	-32.6237	188.535	7.49419	28.92	28.92
C(=O)(C=C(N(C)C)C=C)C	-45.3084	212.847		C(CC(N(C)C)CC)(O)C	145.246	3	6	4.13092	-12.4964	189.658	7.63027	18.3	18.3
C(=C)(C=Cn1cccc1)C	-62.0637	212.988		C(CCN1CCCC1)(C)C	141.258	4	8	5.6634	-27.8537	171.903	7.96889	22.45	22.45
C(=C)(OC=CC(=C(C)C)O)C	-14.5463	227.016		C(OCCC(C(C)C)O)(C)C	160.257	3	6	3.74399	-31.5195	198.277	6.86972	30.58	30.58
C(=C)(N1C2=CN(C(=C1)C2)C)C	-12.6624	215.062		C(N2C1CC(N(C1)C)C2)(C)C	154.257	3	6	3.88961	-14.5659	181.517	8.18637	19.47	19.47
C(N=C(C(=C)C=C)C)(C)(C)C	-18.2739	170.134		C(NC(C(CC)C)C)(C)(C)C	157.301	3	6	3.81434	-15.2865	178.837	7.55148	26.38	26.38
C(NC(=C)C(=C)C=C)(C)(C)C	-31.3269	189.096		C(NC(C(CC)C)C)(C)(C)C	157.301	3	6	3.81434	-15.2865	178.837	7.55148	28.67	28.67
C(N=CC(=C)C=C)(C)(C)C	-31.1225	166.349		C(NCC(CC)C)(C)(C)C	143.274	3	6	4.18778	-14.6565	154.387	7.09507	27.22	27.22
C(=NC=CC(=C)C)(C)C	-52.0302	181.607		C(CCNC(C)C)(C)C	129.247	3	6	4.64227	-61.0175	139.968	2.05927	25.01	25.01
C(=CC(=C(C)C)O)(C=COC)C	-10.6683	239.58		C(CCOC)(CC(C(C)C)O)C	174.284	3	6	3.44266	-34.4391	222.111	7.48524	26.9	26.9
C(=C)(C=COC)CC(=C(C)C)O	-11.3215	223.726		C(CCOC)(CC(C(C)C)O)C	174.284	3	6	3.44266	-34.4391	222.111	7.48524	29.74	29.74
C(=C)(C=COC=C)C	-37.5781	104.136		C(CCOCC)(C)C	116.204	3	6	5.16333	-105.3	110.015	7.8873	31.77	31.77
C(=C)(OC=C)OC=C	-84.0034	104.266		C(OCC)(OCC)C	118.176	3	6	5.07717	-85.2198	107.501	7.61973	35.39	35.39
C(OC=CC(=C)C(=O)C)(C)(C)C	-51.9628	225.627		C(OCCC(C(O)C)C)(C)(C)C	174.284	3	6	3.44266	-28.3126	217.786	7.43623	25.97	25.97
C(OC=CC(=C)C(=C)O)(C)(C)C	-16.7646	222.74		C(OCCC(C(O)C)C)(C)(C)C	174.284	3	6	3.44266	-28.3126	217.786	7.43623	32.51	32.51
C(=COC)(C=N)OC=C	-27.9147	166.299		C(OCC)(CN)COC	133.191	3	6	4.50481	-37.487	160.995	6.92898	30.15	30.15
C(=C)(OC=C(C=N)OC)C	-37.6245	180.774		C(OCC(OC)CN)(C)C	147.218	3	6	4.07559	-29.4727	170.924	6.83265	30.01	30.01
C(=C)(NOC=CC(=C)C)C	-15.63	168.068		C(CCONC(C)C)(C)C	145.246	3	6	4.13092	-59.4266	144.739	7.97866	28.07	28.07
C(=C)(CN(C(=C)C=C)C)C	-45.3437	171.325		C(CN(C(CC)C)C)(C)C	143.274	3	6	4.18778	-51.2896	154.595	7.11837	27.23	27.23
C(=CN(C(=C)C=C)C)(C)C	-45.4361	171.168		C(CN(C(CC)C)C)(C)C	143.274	3	6	4.18778	-51.2896	154.595	7.11837	24.5	24.5
C(=N)(CN(C=CC(=C)C)C)C	-23.0177	241.081		C(CN(CCC(C)C)C)(N)C	158.289	3	6	3.79054	-24.1885	194.896	7.21526	22.46	22.46
C(=O)(CN(C=CC(=C)C)C)C	-45.4911	207.92		C(CN(CCC(C)C)C)(O)C	159.273	3	6	3.76712	-18.5147	208.252	7.23691	20.83	20.83
C(=CC(=C(C)C)C)(C=N)C	-28.6759	193.538		C(CN)(CC(C(C)C)C)C	143.274	3	6	4.18778	-15.3889	174.121	7.44031	21.29	21.29
C(=C)(C=N)CC(=C(C)C)C	-30.0596	178.512		C(CN)(CC(C(C)C)C)C	143.274	3	6	4.18778	-15.3889	174.121	7.44031	24.82	24.82
C(=C)(C=N)CC(=C(C)C)OC	-42.6692	203.978		C(CN)(CC(C(C)C)OC)C	159.273	3	6	3.76712	-56.223	194.874	7.57107	26.58	26.58
C(=C)(OC1=CN(C=COC1)C)C	-14.917	228.964		C(OC1COCCN(C1)C)(C)C	173.256	3	6	3.46308	-45.6257	200.186	6.98868	29.33	29.33
C(=C)(OC1=COC=CN(C1)C)C	-14.917	228.964		C(OC1COCCN(C1)C)(C)C	173.256	3	6	3.46308	-45.6257	200.186	6.98868	32.02	32.02
C(=C)(Oc1oc(c(c1)C)C)C	-32.1083	190.262		C(OC1OC(C(C1)C)C)(C)C	158.241	3	6	3.79168	-71.0105	166.009	7.78604	25.81	25.81
C(OC1=CC(=C)C(=C)O1)(C)(C)C	-32.8444	200.272		C(OC1OC(C(C1)C)C)(C)(C)C	172.268	3	6	3.48295	-74.3596	175.813	7.71491	21.31	21.31
C(Oc1occ(C=C)c1)(C)(C)C	-20.9946	201.138		C(OC1OCC(CC)C1)(C)(C)C	172.268	3	6	3.48295	-71.1875	186.255	7.45347	25.72	25.72
C(=C)(Oc1occc1)C	-37.1817	166.268		C(OC1OCCC1)(C)C	130.187	3	6	4.60876	-69.3539	151.717	6.90025	25.79	25.79
C(OC=C(C(=C)C)C=N)(C)(C)C	-41.9536	206.755		C(OCC(C(C)C)CN)(C)(C)C	173.3	3	6	3.4622	-60.1117	211.087	6.84529	28.59	28.59
C(=C)(Cn1c(ccc1)C)C	-61.855	198.458		C(CN1C(CCC1)C)(C)C	141.258	3	6	4.24755	-28.0072	159.274	7.27115	18.32	18.32
C(=Cn1c(ccc1)C)(C)C	-62.0243	198.822		C(CN1C(CCC1)C)(C)C	141.258	3	6	4.24755	-28.0072	159.274	7.27115	19.47	19.47
C(=Cn1cccc1)(C)C	-61.9993	173.89		C(CN1CCCC1)(C)C	127.231	3	6	4.71583	-43.6939	153.544	7.94361	19.7	19.7
C(=C)(Cn1cccc1)C	-60.1334	173.784		C(CN1CCCC1)(C)C	127.231	3	6	4.71583	-43.6939	153.544	7.94361	18.64	18.64
C(=CN1C=COC=C1)(C)C	-33.5658	194.635		C(CN1CCOCC1)(C)C	143.23	3	6	4.18907	-49.4839	183.474	7.88239	24.69	24.69
C(=C)(CN1C=COC=C1)C	-34.181	197.348		C(CN1CCOCC1)(C)C	143.23	3	6	4.18907	-49.4839	183.474	7.88239	27.64	27.64
C(=C)(C=NC(=C)C)C	-56.8804	157.887		C(CNC(C)C)(C)C	115.22	3	6	5.20743	-62.7197	124.416	7.98201	24.63	24.63
C(=C)(Oc1ccoc1)C	-37.1946	150.199		C(OC1CCOC1)(C)C	130.187	3	6	4.60876	-69.355	151.68	6.90025	24.17	24.17
C(=CN=CC(=C)C)(C)C	-39.2992	181.555		C(CNCC(C)C)(C)C	129.247	3	6	4.64227	-62.5388	140.195	7.77734	23.88	23.88
C(=C)(CN=CC(=C)C)C	-38.8635	175.563		C(CNCC(C)C)(C)C	129.247	3	6	4.64227	-62.5388	140.195	7.77734	26.33	26.33
C(=C)(C=NC=C(OC)OC)C	-44.6833	190.053		C(CNCC(OC)OC)(C)C	161.245	3	6	3.72105	-53.3683	178.355	7.83353	26.06	26.06
C(=C)(C=NC=C)C	-34.8499	126.904		C(CNCC)(C)C	101.193	3	6	5.92926	-68.3124	99.3073	3.31006	25.05	25.05
C(=C)(OC)OC(=C)C(=C)C	-93.7792	156.876		C(OC)(OC(C(C)C)C)C	146.23	3	6	4.10313	-79.4395	139.082	7.24925	33.42	33.42
C(=C)(OC)OC(=C(C=C)C)C	-80.2337	183.85		C(OC)(OC(C(CC)C)C)C	160.257	3	6	3.74399	-71.9738	165.758	7.66615	32.8	32.8
C(=C)(C=O)CC(=C(C)C)C	-13.5457	200.881		C(CO)(CC(C(C)C)C)C	144.258	3	6	4.15921	-55.3249	181.265	7.40642	23.18	23.18
C(=C)(C=O)CC(=C(C)C)OC	-24.9747	222.908		C(CO)(CC(C(C)C)OC)C	160.257	3	6	3.74399	-40.6888	208.988	7.48745	24.88	24.88
C(=C)(OC)COC=CN=C	-36.3	174.805		C(OC)(COCCNC)C	147.218	3	6	4.07559	-12.4629	172.146	7.00961	28.94	28.94
C(=COC=CN=C)(OC)C	-36.1383	178.194		C(OC)(COCCNC)C	147.218	3	6	4.07559	-12.4629	172.146	7.00961	29.04	29.04
C(=C)(C=NC=C(OC)C)OC	-44.6807	190.053		C(OC)(CNCC(OC)C)C	161.245	3	6	3.72105	-53.3702	178.514	7.0518	26.6	26.6
C(=C)(OC)CN=CC(=C)OC	-44.657	189.834		C(OC)(CNCC(OC)C)C	161.245	3	6	3.72105	-53.3702	178.514	7.0518	29.1	29.1
C(=C)(C=CN=C)C	-60.0232	126.871		C(CCNC)(C)C	101.193	3	6	5.92926	-68.0855	100.057	5.65491	26.12	26.12
C(=C)(COC(=C)CC(=C)O)C	-15.3034	226.859		C(COC(CC(O)C)C)(C)C	160.257	3	6	3.74399	-31.2186	202.219	7.43218	31.88	31.88
C(=CN=C)(C=COC)OC	-36.1171	178.188		C(OC)(CCOC)CNC	147.218	3	6	4.07559	-12.5767	172.133	6.92696	27.51	27.51
C(=N)(COC(=C(C)C)C=C)C	-27.4476	203.977		C(COC(C(C)C)CC)(N)C	159.273	3	6	3.76712	-55.9141	198.209	7.61532	25.83	25.83
C(=COC(=CC(=C)O)C)(C)C	-13.5349	227.305		C(COC(CC(O)C)C)(C)C	160.257	3	6	3.74399	-31.2186	202.219	7.43218	31.28	31.28
C(=O)(CC(=C)OC=C(C)C)C	-46.6383	222.814		C(COC(CC(O)C)C)(C)C	160.257	3	6	3.74399	-31.2186	202.219	7.43218	26.62	26.62
C(=C)(CC(=C)OC=C(C)C)O	-14.8039	233.238		C(COC(CC(O)C)C)(C)C	160.257	3	6	3.74399	-31.2186	202.219	7.43218	33.12	33.12
C(=C)(COC(=CC(=O)C)C)C	-46.6383	222.876		C(COC(CC(O)C)C)(C)C	160.257	3	6	3.74399	-31.2186	202.219	7.43218	23.98	23.98
C(=C)(COC(=C)CC(=O)C)C	-47.3857	222.877		C(COC(CC(O)C)C)(C)C	160.257	3	6	3.74399	-31.2186	202.219	7.43218	25.55	25.55
C(=C)(COC(=C)C=C(O)C)C	-14.732	234.64		C(COC(CC(O)C)C)(C)C	160.257	3	6	3.74399	-31.2186	202.219	7.43218	30.08	30.08
C(=C)(COC(=CC(=C)O)C)C	-13.8945	234.665		C(COC(CC(O)C)C)(C)C	160.257	3	6	3.74399	-31.2186	202.219	7.43218	30.25	30.25
C(=C)(COC)CC(=C(C)C)C=O	-38.0554	228.99		C(COC)(CC(C(C)C)CO)C	174.284	3	6	3.44266	-32.8486	220.498	7.43238	22.14	22.14
C(=C)(COC)CC(=C)C(=N)C	-14.5035	203.969		C(COC)(CC(C(N)C)C)C	159.273	3	6	3.76712	-68.4847	201.012	7.84178	26.65	26.65
C(=COC)(CC(=C)C(=O)C)C	-24.9371	222.908		C(COC)(CC(C(O)C)C)C	160.257	3	6	3.74399	-45.0232	198.284	7.78027	24.5	24.5
C(=COC)(C=C(C(=C)O)C)C	-13.4956	227.173		C(COC)(CC(C(O)C)C)C	160.257	3	6	3.74399	-45.0232	198.284	7.78027	27.99	27.99
C(=COC)(CC(=C)C(=C)O)C	-14.0691	233.155		C(COC)(CC(C(O)C)C)C	160.257	3	6	3.74399	-45.0232	198.284	7.78027	31.35	31.35
C(=CC(=C)C(=O)C)(COC)C	-24.9371	223.002		C(COC)(CC(C(O)C)C)C	160.257	3	6	3.74399	-45.0232	198.284	7.78027	22.06	22.06
C(=CC(=C)C(=C)O)(COC)C	-14.2285	233.169		C(COC)(CC(C(O)C)C)C	160.257	3	6	3.74399	-45.0232	198.284	7.78027	28.03	28.03
C(=C)(C=C(C(=O)C)C)COC	-24.9371	223.002		C(COC)(CC(C(O)C)C)C	160.257	3	6	3.74399	-45.0232	198.284	7.78027	20.3	20.3
C(=C)(C=C(C(=C)O)C)COC	-14.0691	233.148		C(COC)(CC(C(O)C)C)C	160.257	3	6	3.74399	-45.0232	198.284	7.78027	27.14	27.14
C(=C)(COC)CC(=C)C(=O)C	-47.3398	223.053		C(COC)(CC(C(O)C)C)C	160.257	3	6	3.74399	-45.0232	198.284	7.78027	24.08	24.08
C(=C)(COC)CC(=C)C(=C)O	-14.6375	226.838		C(COC)(CC(C(O)C)C)C	160.257	3	6	3.74399	-45.0232	198.284	7.78027	30.64	30.64
C(=C)(COC)CC(=C)C=N	-48.0063	181.835		C(COC)(CC(CN)C)C	145.246	3	6	4.13092	-72.6673	182.792	7.62792	27.14	27.14
C(=C)(COC)CC(=C)C=O	-31.7733	199.859		C(COC)(CC(CO)C)C	146.23	3	6	4.10313	-55.7622	200.281	7.43654	24.94	24.94
C(=C)(COC)NC(=C)C=C	-52.4057	193.901		C(COC)(NC(CC)C)C	145.246	3	6	4.13092	-67.388	158.753	7.58225	26.53	26.53
C(=COC=C(C=C(C)C)O)(C)C	-14.0604	242.185		C(COCC(CC(C)C)O)(C)C	174.284	3	6	3.44266	-44.7944	222.809	6.76504	30.01	30.01
C(=COCC(=O)C=C(C)C)(C)C	-13.8606	226.158		C(COCC(CC(C)C)O)(C)C	174.284	3	6	3.44266	-44.7944	222.809	6.76504	23.41	23.41
C(=C)(COC=C(C=C(C)C)O)C	-14.4356	223.98		C(COCC(CC(C)C)O)(C)C	174.284	3	6	3.44266	-44.7944	222.809	6.76504	29.31	29.31
C(=C)(CC(=O)COC=C(C)C)C	-38.1288	228.994		C(COCC(CC(C)C)O)(C)C	174.284	3	6	3.44266	-44.7944	222.809	6.76504	25.36	25.36
C(=C)(COCC(=O)C=C(C)C)C	-38.1288	228.99		C(COCC(CC(C)C)O)(C)C	174.284	3	6	3.44266	-44.7944	222.809	6.76504	22.17	22.17
C(=C)(CC(=O)COCC(=C)C)C	-52.8125	228.566		C(COCC(CC(C)C)O)(C)C	174.284	3	6	3.44266	-44.7944	222.809	6.76504	24.22	24.22
C(=C)(COC=C(C=C)C)C	-78.5647	177.94		C(COCC(CC)C)(C)C	144.258	3	6	4.15921	-85.5607	169.807	6.43156	30.16	30.16
C(=COCC(=C)C=C)(C)C	-78.5647	175.702		C(COCC(CC)C)(C)C	144.258	3	6	4.15921	-85.5607	169.807	6.43156	30.21	30.21
C(=C)(COCC(=C)C=C)C	-79.1657	175.334		C(COCC(CC)C)(C)C	144.258	3	6	4.15921	-85.5607	169.807	6.43156	28.94	28.94
C(=COC=C(C=C)C)(C)C	-66.8907	172.214		C(COCC(CC)C)(C)C	144.258	3	6	4.15921	-85.5607	169.807	6.43156	30.85	30.85
C(=COCc1occc1)(C)C	-32.8445	205.389		C(COCC1OCCC1)(C)C	158.241	3	6	3.79168	-70.0167	188.254	7.01133	22.95	22.95
C(=COC=CC(=C(O)C)C)(C)C	-14.0558	242.202		C(COCCC(C(O)C)C)(C)C	174.284	3	6	3.44266	-45.2575	220.413	7.43238	30.77	30.77
C(=C)(COCc1occc1)C	-32.0513	190.355		C(COCC1OCCC1)(C)C	158.241	3	6	3.79168	-70.0167	188.254	7.01133	22.03	22.03
C(=C)(COC=CC(=C(O)C)C)C	-14.323	224.148		C(COCCC(C(O)C)C)(C)C	174.284	3	6	3.44266	-45.2575	220.413	7.43238	30.08	30.08
C(C=CC(=O)C(=C)C)(OC)(C)C	-51.9349	225.619		C(OC)(CCC(C(C)C)O)(C)C	174.284	3	6	3.44266	-34.2384	214.849	6.87681	22.7	22.7
C(C=CC(=C)C(=O)C)(OC)(C)C	-51.9155	225.619		C(OC)(CCC(C(O)C)C)(C)C	174.284	3	6	3.44266	-44.8184	217.749	7.48671	21.97	21.97
C(C=CC(=C)C(=C)O)(OC)(C)C	-26.5387	222.691		C(OC)(CCC(C(O)C)C)(C)C	174.284	3	6	3.44266	-44.8184	217.749	7.48671	27.96	27.96
C(=CONC(=C)C=C)(C)C	-15.5452	168.075		C(CONC(CC)C)(C)C	145.246	3	6	4.13092	-71.1868	144.738	7.15061	28.21	28.21
C(=C)(OC(=C)C=O)C	-11.9293	161.401		C(OC(CO)C)(C)C	118.176	3	6	5.07717	-31.9727	151.369	6.64762	28.29	28.29
C(=C)(CONC(=C)C=C)C	-15.8725	166.565		C(CONC(CC)C)(C)C	145.246	3	6	4.13092	-71.1868	144.738	7.15061	27.25	27.25
C(=C)(N(C(=O)C(=C)OC)C)C	-40.6296	227.393		C(N(C(C(OC)C)O)C)(C)C	161.245	3	6	3.72105	-10.1972	194.337	7.56287	17.24	17.24
C(=C)(N(C(=C)C=C)C)C	-71.7159	174.29		C(N(C(CC)C)C)(C)C	129.247	3	6	4.64227	-73.1278	135.913	6.826	25.89	25.89
C(=C(n1cccc1)OC)(OC)C	-41.4478	229.228		C(OC)(C(N1CCCC1)OC)C	173.256	3	6	3.46308	-45.8024	200.522	7.30398	19.88	19.88
C(=C)(OC)C(n1cccc1)OC	-41.9177	223.344		C(OC)(C(N1CCCC1)OC)C	173.256	3	6	3.46308	-45.8024	200.522	7.30398	19.33	19.33
C(C=C(C(=C)C=C)O)(OC)(C)C	-12.0375	222.347		C(OC)(CC(C(CC)C)O)(C)C	174.284	3	6	3.44266	-34.4303	213.553	7.48671	27.9	27.9
C(OC)(CC(=O)C(=C)C=C)(C)C	-69.7794	225.005		C(OC)(CC(C(CC)C)O)(C)C	174.284	3	6	3.44266	-34.4303	213.553	7.48671	23.76	23.76
C(=C)(C=C)CC(OC)(C=O)C	-30.289	214.235		C(OC)(CC(CC)C)(CO)C	160.257	3	6	3.74399	-30.0495	202.532	7.53459	26.07	26.07
C(OC)(C=C(C=C)C=N)(C)C	-41.4433	203.026		C(OC)(CC(CC)CN)(C)C	159.273	3	6	3.76712	-71.9266	201.148	7.09948	23.88	23.88
C(OC(=CC(=O)C=C)C)(C)(C)C	-51.9749	225.627		C(OC(CC(CC)O)C)(C)(C)C	174.284	3	6	3.44266	-44.7888	215.114	7.31894	24.84	24.84
C(OC(=C)C=C(C=C)O)(C)(C)C	-26.5973	222.625		C(OC(CC(CC)O)C)(C)(C)C	174.284	3	6	3.44266	-44.7888	215.114	7.31894	30.25	30.25
C(OC(=C)CC(=O)C=C)(C)(C)C	-69.7794	224.999		C(OC(CC(CC)O)C)(C)(C)C	174.284	3	6	3.44266	-44.7888	215.114	7.31894	26.34	26.34
C(=C)(C=C)OC(=O)C	-55.6195	123.7		C(OC(CC)C)(O)C	118.176	3	6	5.07717	-18.0294	145.338	7.52424	19.57	19.57
C(=C)(OC(=COC)C=C)C	-90.5266	167.074		C(OC(CC)COC)(C)C	146.23	3	6	4.10313	-79.0668	142.411	6.52245	32.73	32.73
C(=NC=COCOC=C)(C)C	-44.6645	190.138		C(NCCOCOCC)(C)C	161.245	3	6	3.72105	-42.7296	188.759	7.86573	28.18	28.18
C(=C)(C(=C(C)C)N=C(C)C)C	-25.5551	170.547		C(NC(C(C)C)C(C)C)(C)C	157.301	3	6	3.81434	-13.8658	178.638	7.77878	22.7	22.7
C(=C)(C(C(=C)C)N=C(C)C)C	-18.537	165.352		C(NC(C(C)C)C(C)C)(C)C	157.301	3	6	3.81434	-13.8658	178.638	7.77878	26.92	26.92
C(=C)(NC(=C(C)C)C(=C)C)C	-49.1437	202		C(NC(C(C)C)C(C)C)(C)C	157.301	3	6	3.81434	-13.8658	178.638	7.77878	23.38	23.38
C(=NC(=C(C=C)C)C)(C)C	-19.0864	170.247		C(NC(C(CC)C)C)(C)C	143.274	3	6	4.18778	-14.5926	154.105	7.50727	23.56	23.56
C(=C)(NC(=C(C=C)C)C)C	-56.5177	197.921		C(NC(C(CC)C)C)(C)C	143.274	3	6	4.18778	-14.5926	154.105	7.50727	23.58	23.58
C(=NC(=C)C=C)(C)C	-56.8784	157.892		C(NC(CC)C)(C)C	115.22	3	6	5.20743	-55.9121	124.421	6.96195	25.26	25.26
C(=C)(N=C(C=C)C)C	-56.8784	157.892		C(NC(CC)C)(C)C	115.22	3	6	5.20743	-55.9121	124.421	6.96195	24.65	24.65
C(=C)(NC(=C)C=C)C	-59.9261	159.764		C(NC(CC)C)(C)C	115.22	3	6	5.20743	-55.9121	124.421	6.96195	26.19	26.19
C(=C)(OC(=C(C)C)C=N)C	-20.266	181.84		C(OC(C(C)C)CN)(C)C	145.246	3	6	4.13092	-62.6768	173.676	6.94652	28.03	28.03
C(=C)(OC(=C(C)C)C=O)C	-31.2142	204.508		C(OC(C(C)C)CO)(C)C	146.23	3	6	4.10313	-55.6699	179.039	6.76181	26.9	26.9
C(=C)(OC(=C(C=C)C)C)C	-78.7821	175.591		C(OC(C(CC)C)C)(C)C	144.258	3	6	4.15921	-86.121	151.608	7.2951	30.95	30.95
C(=NC)(CC(=C(C)C)C=C)C	-25.7515	171.277		C(NC)(CC(C(C)C)CC)C	157.301	3	6	3.81434	-39.2889	195.819	7.60302	25.29	25.29
C(=C(C=C)C)(CC(=NC)C)C	-25.7569	171.285		C(NC)(CC(C(CC)C)C)C	157.301	3	6	3.81434	-39.4546	195.847	7.79121	23.84	23.84
C(=C)(N=C)C=C	-13.6733	130.291		C(NC)(CC)C	87.166	3	6	6.88342	-67.0394	79.5104	7.41452	26.66	26.66
C(=C)C(=NC)C=C	-60.0244	126.897		C(NC)(CC)CC	101.193	3	6	5.92926	-68.3953	100.02	3.31006	26.45	26.45
C(=NC)(C=CC(=C(C)C)C)C	-26.9626	171.945		C(NC)(CCC(C(C)C)C)C	157.301	3	6	3.81434	-52.3406	195.834	7.55148	22.62	22.62
C(=NCC(=C(C)C)C=C)(C)C	-25.5578	170.636		C(NCC(C(C)C)CC)(C)C	157.301	3	6	3.81434	-14.4453	180.965	7.07051	24.15	24.15
C(=CN=C(C)C)(C=C)C	-52.0293	181.617		C(NCC(CC)C)(C)C	129.247	3	6	4.64227	-56.485	140.09	7.21665	24.85	24.85
C(=NCC(=C)C=C)(C)C	-38.9034	175.607		C(NCC(CC)C)(C)C	129.247	3	6	4.64227	-56.485	140.09	7.21665	26.82	26.82
C(=NC=C)(CC(=C(C)C)C)C	-25.6112	170.233		C(NCC)(CC(C(C)C)C)C	157.301	3	6	3.81434	-21.7407	186.816	7.55148	24.03	24.03
C(N=Cc1coc(c1)C)(C)(C)C	-10.1836	195.498		C(NCC1COC(C1)C)(C)(C)C	171.284	3	6	3.50295	-14.3554	203.12	7.67047	18.48	18.48
C(=NCc1coc(c1)C)(C)C	-19.0824	194.32		C(NCC1COC(C1)C)(C)C	157.257	3	6	3.81541	-41.3598	190.411	7.7127	18.72	18.72
C(=C)(OC)C=NC(=COC)C	-44.679	190.054		C(NCC(OC)C)(COC)C	161.245	3	6	3.72105	-66.3432	178.521	7.46659	26.98	26.98
C(=C)(OC)C=NC(=C)COC	-44.6553	189.835		C(NCC(OC)C)(COC)C	161.245	3	6	3.72105	-66.3432	178.521	7.46659	26.16	26.16
C(N=Cc1c(coc1)C)(C)(C)C	-10.1711	195.383		C(NCC1C(COC1)C)(C)(C)C	171.284	3	6	3.50295	-14.3141	203.119	7.55497	18.4	18.4
C(N=CC(=C)C(=C)C)(C)(C)C	-18.2627	170.124		C(NCC(C(C)C)C)(C)(C)C	157.301	3	6	3.81434	-11.18	178.838	6.73501	26.89	26.89
C(=C)(OC)CC(=COC)N=C	-44.6313	189.888		C(NC)(COC)CC(OC)C	161.245	3	6	3.72105	-55.1794	179.398	7.51364	27.49	27.49
C(=CC(=COC)N=C)(OC)C	-44.6548	190.085		C(NC)(COC)CC(OC)C	161.245	3	6	3.72105	-55.1794	179.398	7.51364	26.52	26.52
C(=C)(OC)C=C(N=C)COC	-44.6313	189.879		C(NC)(COC)CC(OC)C	161.245	3	6	3.72105	-55.1794	179.398	7.51364	25.97	25.97
C(=Nc1c(oc(c1)C)C)(C)C	-19.0598	194.413		C(NC1C(OC(C1)C)C)(C)C	157.257	3	6	3.81541	-33.2934	179.627	7.83137	18.68	18.68
N(=C(C=COC)C=COC)C	-44.6821	192.696		C(NC)(CCOC)CCOC	161.245	3	6	3.72105	-42.2455	197.377	7.79975	27.75	27.75
C(=NC)(C=COC=C)COC	-44.6348	190.13		C(NC)(CCOCC)COC	161.245	3	6	3.72105	-15.0641	189.055	7.00857	29.26	29.26
C(=C)(NOC(=C(C=C)C)C)C	-34.5831	179.346		C(NOC(C(CC)C)C)(C)C	159.273	3	6	3.76712	-71.2895	157.075	7.58896	26.98	26.98
C(N=C)(CC(=C)C=C)(C)C	-18.0936	162.465		C(NC)(CC(CC)C)(C)C	143.274	3	6	4.18778	-39.953	145.602	7.1792	28.77	28.77
C(=CC(N=C)(C)C)(C=C)C	-31.3242	166.505		C(NC)(CC(CC)C)(C)C	143.274	3	6	4.18778	-39.953	145.602	7.1792	25.88	25.88
C(=C)(NOC=C(C=C)C)C	-15.7961	168.068		C(NOCC(CC)C)(C)C	145.246	3	6	4.13092	-59.5237	144.739	7.15061	28.06	28.06
C(=C)(NOCC(=C)C=C)C	-15.5231	167.706		C(NOCC(CC)C)(C)C	145.246	3	6	4.13092	-59.5237	144.739	7.15061	27.1	27.1
C(=NOC=COC=C)(C)C	-30.1882	175.436		C(NOCCOCC)(C)C	147.218	3	6	4.07559	-10.4473	148.017	7.87595	30.15	30.15
C(N=C(c1occc1)C)(C)(C)C	-10.2275	195.426		C(NC(C1OCCC1)C)(C)(C)C	171.284	3	6	3.50295	-23.9823	210.511	7.59647	19.22	19.22
C(N=C(C=C)C=C)(C)(C)C	-31.109	166.338		C(NC(CC)CC)(C)(C)C	143.274	3	6	4.18778	-12.2405	154.617	7.86879	25.97	25.97
C(=C)(OC(=C)C=C)C	-51.2027	113.332		C(OC(CC)C)(C)C	116.204	3	6	5.16333	-92.6896	102.886	6.44728	32.08	32.08
C(=C)(NC(=C)COC=C)C	-52.8721	183.987		C(NC(COCC)C)(C)C	145.246	3	6	4.13092	-67.4106	158.795	6.83913	28.18	28.18
C(=C)(OC)CC(=C(C=C)C)O	-16.8489	222.791		C(OC)(CC(C(CC)C)O)C	160.257	3	6	3.74399	-21.1666	194.63	7.78027	29.01	29.01
C(=C)(NC(=C)C(=C)OC)C	-52.5235	183.846		C(NC(C(OC)C)C)(C)C	145.246	3	6	4.13092	-67.3883	148.916	7.47667	27.41	27.41
C(=CC(=C)C(=C)C)(OC)C	-78.8272	175.657		C(OC)(CC(C(C)C)C)C	144.258	3	6	4.15921	-86.0622	153.471	7.37214	28.85	28.85
C(=C)(OC)C=C(C(=C)C)C	-78.8272	175.657		C(OC)(CC(C(C)C)C)C	144.258	3	6	4.15921	-86.0622	153.471	7.37214	27.02	27.02
C(=C)(OC)CC(=C)C(=C)C	-79.6593	175.278		C(OC)(CC(C(C)C)C)C	144.258	3	6	4.15921	-86.0622	153.471	7.37214	30.65	30.65
C(=C)(OC)CC(=C(C)C)C=N	-27.4396	203.981		C(OC)(CC(C(C)C)CN)C	159.273	3	6	3.76712	-68.4358	194.859	7.61532	25.48	25.48
C(=C)(OC)CC(=C(C)C)C=O	-24.9669	222.908		C(OC)(CC(C(C)C)CO)C	160.257	3	6	3.74399	-31.4022	202.204	7.53755	23.48	23.48
C(=CC(=C(C=C)C)O)(OC)C	-15.821	226.909		C(OC)(CC(C(CC)C)O)C	160.257	3	6	3.74399	-21.1666	194.63	7.78027	27.71	27.71
C(=CC(=C(C=C)C)OC)(OC)C	-67.3249	204.727		C(OC)(CC(C(CC)C)OC)C	174.284	3	6	3.44266	-54.3793	175.333	7.52674	27.7	27.7
C(=C)(OC)CC(=C(C=C)C)OC	-67.1855	195.02		C(OC)(CC(C(CC)C)OC)C	174.284	3	6	3.44266	-54.3793	175.333	7.52674	29.02	29.02
C(=C)(OC)CC(=C)C(=N)C	-14.1502	181.864		C(OC)(CC(C(N)C)C)C	145.246	3	6	4.13092	-68.4163	178.313	7.88544	27.59	27.59
C(=CC(=C)C(=O)C)(OC)C	-11.8125	204.511		C(OC)(CC(C(O)C)C)C	146.23	3	6	4.10313	-47.2556	188.466	7.74641	23.61	23.61
C(=C)(OC)C=C(C(=O)C)C	-11.8125	204.511		C(OC)(CC(C(O)C)C)C	146.23	3	6	4.10313	-47.2556	188.466	7.74641	21.96	21.96
C(=C)(OC)CC(=C)C(=O)C	-14.3243	199.855		C(OC)(CC(C(O)C)C)C	146.23	3	6	4.10313	-47.2556	188.466	7.74641	25.23	25.23
C(=C)(OC)CC(=C)C(=C)O	-13.1556	202.94		C(OC)(CC(C(O)C)C)C	146.23	3	6	4.10313	-47.2556	188.466	7.74641	31.8	31.8
C(=CC(=C(O)C)C=C)(OC)C	-14.5721	227.058		C(OC)(CC(C(O)C)CC)C	160.257	3	6	3.74399	-44.825	198.288	7.74118	28.41	28.41
C(=C)(OC)OC(=C)C=N	-28.3887	166.818		C(CN)(OC(OC)C)C	133.191	3	6	4.50481	-39.3989	154.808	7.46638	30.63	30.63
C(=C)(OC)CC(=C(O)C)C=C	-15.1732	226.994		C(OC)(CC(C(O)C)CC)C	160.257	3	6	3.74399	-44.825	198.288	7.74118	30.24	30.24
C(=CC(C=C)(OC)C)(C=N)C	-41.4615	203.992		C(OC)(CC)(CC(CN)C)C	159.273	3	6	3.76712	-71.959	201.192	7.61204	25.74	25.74
C(=C)(C=N)CC(C=C)(OC)C	-41.4172	202.592		C(OC)(CC)(CC(CN)C)C	159.273	3	6	3.76712	-71.959	201.192	7.61204	27.27	27.27
C(=C)(C=O)CC(C=C)(OC)C	-30.2827	214.008		C(OC)(CC)(CC(CO)C)C	160.257	3	6	3.74399	-40.1263	209.511	7.53459	25.84	25.84
C(=COC)(OC)CN=C(C=C)C	-45.0005	192.986		C(CC)(NCC(OC)COC)C	175.272	3	6	3.42325	-58.1329	202.195	7.51566	27.24	27.24
C(=CN=C(C=C)C)(OC)COC	-45.0005	192.986		C(CC)(NCC(OC)COC)C	175.272	3	6	3.42325	-58.1329	202.195	7.51566	25.1	25.1
C(=C)(OC)OC(=C)C=C	-87.8214	126.357		C(CC)(OC(OC)C)C	132.203	3	6	4.53847	-80.0795	119.651	7.31829	33.55	33.55
C(=C)(C=COC=C)OC	-85.6759	140.178		C(OC)(CCOCC)C	132.203	3	6	4.53847	-83.9496	126.63	6.66034	32.74	32.74
N(C=CN(C=C)C=C)(C)C	-17.7465	182.307		N(CCN(CC)CC)(C)C	144.262	3	6	4.1591	-28.4393	162.143	7.71154	22.75	22.75
C(=C)(OCC(=C(C(=C)C)C)O)C	-10.4099	222.039		C(OCC(C(C(C)C)C)O)(C)C	174.284	3	6	3.44266	-34.0658	204.98	7.30863	29.95	29.95
C(=C)(OC=C(C(=C(C)C)C)O)C	-10.0134	220.435		C(OCC(C(C(C)C)C)O)(C)C	174.284	3	6	3.44266	-34.0658	204.98	7.30863	30.71	30.71
C(=C)(OCC(=O)C(=C(C)C)C)C	-52.2254	229.104		C(OCC(C(C(C)C)C)O)(C)C	174.284	3	6	3.44266	-34.0658	204.98	7.30863	23.17	23.17
C(=C)(OCC(=C(C=C)O)C)C	-14.7491	226.979		C(OCC(C(CC)O)C)(C)C	160.257	3	6	3.74399	-31.5195	198.277	7.48745	29.5	29.5
C(=C)(OC=C(C(=O)C)C)C	-31.1703	204.508		C(OCC(C(O)C)C)(C)C	146.23	3	6	4.10313	-32.1654	188.51	7.37213	26	26
C(=C)(OCC(=C)C(=O)C)C	-14.3666	199.855		C(OCC(C(O)C)C)(C)C	146.23	3	6	4.10313	-32.1654	188.51	7.37213	25.31	25.31
C(=C)(OC=C(C=C)C)C	-61.8679	136.192		C(OCC(CC)C)(C)C	130.231	3	6	4.6072	-89.7157	129.145	6.9047	31.81	31.81
C(=C)(OCC(=C)C=C)C	-67.1227	137.503		C(OCC(CC)C)(C)C	130.231	3	6	4.6072	-89.7157	129.145	6.9047	30.67	30.67
C(=C)(C=C(OC)C)OC=C	-90.5278	167.074		C(OCC)(CC(OC)C)C	146.23	3	6	4.10313	-79.1299	142.411	7.16663	31.83	31.83
C(=C)(C=C(OC=C)C)OC	-90.5278	167.074		C(OCC)(CC(OC)C)C	146.23	3	6	4.10313	-79.1299	142.411	7.16663	31.83	31.83
C(=C)(OC=C)CC(=C)OC	-90.6122	163.283		C(OCC)(CC(OC)C)C	146.23	3	6	4.10313	-79.1299	142.411	7.16663	33.68	33.68
N(=C)C=C(OC=C)COC	-36.3044	174.804		C(OCC)(CNC)COC	147.218	3	6	4.07559	-12.5959	172.126	7.00961	28.91	28.91
N(=C)CC(=COC)OC=C	-36.3044	174.804		C(OCC)(CNC)COC	147.218	3	6	4.07559	-12.5959	172.126	7.00961	31.33	31.33
C(=COC)(C=NC)OC=C	-36.1425	178.187		C(OCC)(CNC)COC	147.218	3	6	4.07559	-12.5959	172.126	7.00961	30.45	30.45
C(=C)(C=N)OC=C	-30.0289	139.358		C(OCC)(CN)C	103.165	3	6	5.81593	-16.9653	117.59	7.23147	29.65	29.65
C(=COC=C)(OC=C)C	-85.6762	139.869		C(OCC)(COCC)C	132.203	3	6	4.53847	-84.1745	126.63	5.68007	34.3	34.3
C(=C)(COC=C)OC=C	-87.8425	126.862		C(OCC)(COCC)C	132.203	3	6	4.53847	-84.1745	126.63	5.68007	34.21	34.21
C(=C)(C=C1OC=C(C1)C)C	-16.0636	183.93		C(CC1OCC(C1)C)(C)C	142.242	3	6	4.21816	-18.7868	174.382	7.63619	29.11	29.11
C(=Cc1occ(c1)C)(C)C	-87.3421	174.506		C(CC1OCC(C1)C)(C)C	142.242	3	6	4.21816	-18.7868	174.382	7.63619	21.28	21.28
C(=CC1=CC(=C)CO1)(C)C	-16.0636	184.388		C(CC1OCC(C1)C)(C)C	142.242	3	6	4.21816	-18.7868	174.382	7.63619	26.31	26.31
C(=C)(Cc1occ(c1)C)C	-87.4878	174.438		C(CC1OCC(C1)C)(C)C	142.242	3	6	4.21816	-18.7868	174.382	7.63619	20.66	20.66
C(=C)(C=C1OCC(=C1)C)C	-16.0636	184.388		C(CC1OCC(C1)C)(C)C	142.242	3	6	4.21816	-18.7868	174.382	7.63619	26.88	26.88
C(=C)(C=C1OCC(=C)C1)C	-18.2392	188.48		C(CC1OCC(C1)C)(C)C	142.242	3	6	4.21816	-18.7868	174.382	7.63619	28.44	28.44
C(=C)(CC1=CC(=C)CO1)C	-18.2392	188.48		C(CC1OCC(C1)C)(C)C	142.242	3	6	4.21816	-18.7868	174.382	7.63619	27.79	27.79
C(=C)(C=Cc1c(occ1)C)C	-84.689	198.655		C(CCC1C(OCC1)C)(C)C	156.269	4	8	5.11938	-19.3501	194.002	7.66344	23.53	23.53
C(=C)(c1c(cncc1)C)C	-16.5093	196.364		C(C1C(CNCC1)C)(C)C	141.258	4	8	5.6634	-18.4443	161.581	7.7229	17.67	17.67
C(=C)(C1=CC(=C)C(=C1)C)C	-83.9821	181.009		C(C1CC(C(C1)C)C)(C)C	140.27	4	8	5.70329	-103.026	160.867	7.36325	22.86	22.86
C(=C)(C1=CC(=C)C(=C)C1)C	-83.8767	177.444		C(C1CC(C(C1)C)C)(C)C	140.27	4	8	5.70329	-103.026	160.867	7.36325	25.22	25.22
C(=N)(C1=CC(=C(C)C)C=C1)C	-11.9995	208.234		C(C1CCC(C(N)C)C1)(C)C	155.285	4	8	5.15182	-18.4381	195.084	7.85511	20.42	20.42
C(=C1C=CC(=C1)C(=C)N)(C)C	-28.1744	227.592		C(C1CCC(C(N)C)C1)(C)C	155.285	4	8	5.15182	-18.4381	195.084	7.85511	21.42	21.42
C(=C)(C1=CC(=C(N)C)C=C1)C	-41.6326	227.592		C(C1CCC(C(N)C)C1)(C)C	155.285	4	8	5.15182	-18.4381	195.084	7.85511	21	21
C(=C1C=CC(=C1)C=C)(C)C	-77.8848	181.593		C(C1CCC(CC)C1)(C)C	140.27	4	8	5.70329	-109.716	168.101	7.50661	22.77	22.77
C(=C)(C=CC(C=C)(C)C)C	-105.588	170.027		C(CC)(CCC(C)C)(C)C	142.286	3	6	4.21686	-111.622	151.34	7.80945	27.01	27.01
C(=C)(c1ccccc1)C	-51.3533	166.15		C(C1CCCCC1)(C)C	126.243	4	8	6.33699	-84.84	151.909	7.83078	19.61	19.61
C(=C)(c1ccncc1)C	-50.4736	179.793		C(C1CCNCC1)(C)C	127.231	4	8	6.28778	-25.3501	164.775	3.88814	17.92	17.92
C(=N)(C=C)C=C	-16.7046	100.964		C(CC)(CC)N	87.166	3	6	6.88342	-64.7938	90.0008	7.99628	25.83	25.83
C(=COC)(C=C)C=C	-37.6531	104.29		C(CC)(CC)COC	116.204	3	6	5.16333	-105.309	110.015	7.8873	30.32	30.32
C(=C)(C=C)C=C(OC)OC	-90.5285	167.282		C(CC)(CC(OC)OC)C	146.23	3	6	4.10313	-79.1651	142.144	6.34328	31.2	31.2
C(=CC(C=C)(C=C)C)(C)C	-105.588	165.02		C(CC)(CC)(CC(C)C)C	142.286	3	6	4.21686	-111.622	151.34	7.76169	29.7	29.7
C(=C)(CC(C=C)(C=C)C)C	-134.84	164.831		C(CC)(CC)(CC(C)C)C	142.286	3	6	4.21686	-111.622	151.34	7.76169	31.25	31.25
C(=O)(CC(=C)C(=C)C(=C)C)C	-15.2885	192.43		C(CC(C(C(C)C)C)C)(O)C	158.285	4	8	5.05417	-71.9102	204.553	7.67241	25.41	25.41
C(=C)(CC(=O)C(=C)C(=C)C)C	-15.2548	192.557		C(CC(C(C(C)C)C)O)(C)C	158.285	4	8	5.05417	-19.3196	203.331	7.32292	24.99	24.99
C(=C)(CC(=C)C(=O)C(=C)C)C	-15.2603	192.557		C(CC(C(C(C)C)O)C)(C)C	158.285	4	8	5.05417	-18.469	203.355	7.32292	24.6	24.6
C(=NC)(C=C(C=C)C)C	-52.0026	175.75		C(CC)(CC(NC)C)C	129.247	3	6	4.64227	-67.08	143.01	7.69375	23.83	23.83
C(=C)(C=C)CC(=NC)C	-39.0942	175.794		C(CC)(CC(NC)C)C	129.247	3	6	4.64227	-67.08	143.01	7.69375	27.65	27.65
C(=C)(CC(=C)C(=C)C(=O)C)C	-15.292	192.557		C(CC(C(C(O)C)C)C)(C)C	158.285	4	8	5.05417	-27.5683	204.146	7.67241	25.3	25.3
C(=C)(C=C(C(=C)C)C=C)C	-38.9093	174.584		C(CC(C(C)C)CC)(C)C	142.286	4	8	5.62248	-115.867	156.56	6.11919	25.5	25.5
C(=N)(C=C(C(=C)C)C=C)C	-12.8618	199.942		C(CC(C(C)C)CC)(N)C	143.274	4	8	5.58371	-18.11	174.14	7.56673	23.63	23.63
C(=C)(C=C(C(=C)C)C=C)N	-16.3873	201.714		C(CC(C(C)C)CC)(N)C	143.274	4	8	5.58371	-18.11	174.14	7.56673	25.67	25.67
C(=CC(=CN=C)C(=C)C)(C)C	-38.9268	186.293		C(CC(C(C)C)CNC)(C)C	157.301	4	8	5.08579	-37.1874	195.652	6.97625	25.06	25.06
C(=C)(C=C(C(=C)C)C=NC)C	-38.9268	186.316		C(CC(C(C)C)CNC)(C)C	157.301	4	8	5.08579	-37.1874	195.652	6.97625	24.15	24.15
C(=C)(CC(=CN=C)C(=C)C)C	-19.121	185.439		C(CC(C(C)C)CNC)(C)C	157.301	4	8	5.08579	-37.1874	195.652	6.97625	26.75	26.75
C(=C)(C=C(C(=C)C)CN=C)C	-19.121	185.909		C(CC(C(C)C)CNC)(C)C	157.301	4	8	5.08579	-37.1874	195.652	6.97625	25.39	25.39
C(=CC(=NC=C)C(=C)C)(C)C	-38.949	186.166		C(CC(C(C)C)NCC)(C)C	157.301	4	8	5.08579	-12.2235	180.954	6.97625	24.15	24.15
C(=C)(C=C)C=C(OC)C	-61.9404	136.457		C(CC)(CC(OC)C)C	130.231	3	6	4.6072	-90.4475	129.145	7.51499	29.04	29.04
C(=CC(=C)OC)(C=C)C	-61.9404	136.457		C(CC)(CC(OC)C)C	130.231	3	6	4.6072	-90.4475	129.145	7.51499	28.01	28.01
C(=C)(CC(=NC=C)C(=C)C)C	-18.9977	185.28		C(CC(C(C)C)NCC)(C)C	157.301	4	8	5.08579	-12.2235	180.954	6.97625	26.02	26.02
C(=C)(OC)CC(=C)C=C	-67.1857	137.503		C(CC)(CC(OC)C)C	130.231	3	6	4.6072	-90.4475	129.145	7.51499	30.73	30.73
C(=CC(=C)C(=C)C=C)(C)C	-38.9093	174.584		C(CC(C(CC)C)C)(C)C	142.286	4	8	5.62248	-115.867	156.56	6.92375	27.36	27.36
C(=C)(C=C(C(=C)C=C)C)C	-38.9093	174.584		C(CC(C(CC)C)C)(C)C	142.286	4	8	5.62248	-115.867	156.56	6.92375	26.14	26.14
C(=C)(CC(=C)C(=C)C=C)C	-67.8858	174.499		C(CC(C(CC)C)C)(C)C	142.286	4	8	5.62248	-115.867	156.56	6.92375	29.57	29.57
C(=CC(=C)C(=C)C=C)(N)C	-15.9586	201.713		C(CC(C(CC)C)C)(N)C	143.274	4	8	5.58371	-18.3121	174.138	7.75659	26.4	26.4
C(=N)(C=C(C(=C)C=C)C)C	-12.8687	199.941		C(CC(C(CC)C)C)(N)C	143.274	4	8	5.58371	-18.3121	174.138	7.75659	24.38	24.38
C(=C)(CC(=C)C(=C)C=C)N	-13.6975	205.307		C(CC(C(CC)C)C)(N)C	143.274	4	8	5.58371	-18.3121	174.138	7.75659	28.48	28.48
C(=C)(C=C(C(=C)C=C)C)N	-16.3591	201.713		C(CC(C(CC)C)C)(N)C	143.274	4	8	5.58371	-18.3121	174.138	7.75659	25.77	25.77
C(=C)(CC(=O)C(=C)C=C)C	-10.2591	183.121		C(CC(C(CC)C)O)(C)C	144.258	4	8	5.54562	-39.1886	176.568	7.47561	25.31	25.31
C(=C)(CC(=C)C(=O)C=C)C	-10.2642	183.121		C(CC(C(CC)O)C)(C)C	144.258	4	8	5.54562	-54.2213	175.751	7.47561	25.13	25.13
C(=C)(C(=C)C=C)CC(=O)C	-10.2837	183.612		C(CC(C(CC)C)C)(O)C	144.258	4	8	5.54562	-52.0827	177.415	7.732	25.53	25.53
C(=C)(C=C(C(=C)C=N)C)C	-14.0256	199.943		C(CC(C(CN)C)C)(C)C	143.274	4	8	5.58371	-11.1315	174.121	7.44031	23.88	23.88
C(=C)(CC(=C)C(=C)C=N)C	-12.4865	198.608		C(CC(C(CN)C)C)(C)C	143.274	4	8	5.58371	-11.1315	174.121	7.44031	27.19	27.19
C(=C)(CC(=C)C(=C)C=O)C	-10.2771	183.121		C(CC(C(CO)C)C)(C)C	144.258	4	8	5.54562	-55.9646	180.459	7.40642	26.13	26.13
C(=CC(=C)C(=C)N=C)(C)C	-51.891	176.494		C(CC(C(NC)C)C)(C)C	143.274	4	8	5.58371	-54.2521	145.502	7.56673	25.4	25.4
C(=C)(C=C(C(=C)N=C)C)C	-51.891	176.494		C(CC(C(NC)C)C)(C)C	143.274	4	8	5.58371	-54.2521	145.502	7.56673	24.6	24.6
C(=C)(CC(=C)C(=C)N=C)C	-39.0337	178.745		C(CC(C(NC)C)C)(C)C	143.274	4	8	5.58371	-54.2521	145.502	7.56673	27.39	27.39
C(=CC(=C(N=C)C=C)C)(C)C	-38.9275	186.29		C(CC(C(NC)CC)C)(C)C	157.301	4	8	5.08579	-36.3257	195.633	7.55148	23.9	23.9
C(=CC(=C)C(=NC)C=C)(C)C	-38.9275	186.312		C(CC(C(NC)CC)C)(C)C	157.301	4	8	5.08579	-36.3257	195.633	7.55148	25.19	25.19
C(=C)(C=C(C(=NC)C=C)C)C	-38.9275	186.312		C(CC(C(NC)CC)C)(C)C	157.301	4	8	5.08579	-36.3257	195.633	7.55148	24.17	24.17
C(=C)(CC(=C(N=C)C=C)C)C	-19.1175	185.434		C(CC(C(NC)CC)C)(C)C	157.301	4	8	5.08579	-36.3257	195.633	7.55148	24.73	24.73
C(=C)(CC(=C)C(=NC)C=C)C	-19.1175	185.461		C(CC(C(NC)CC)C)(C)C	157.301	4	8	5.08579	-36.3257	195.633	7.55148	27.21	27.21
C(=CC(=C)C(=O)OC=C)(C)C	-47.1943	186.932		C(CC(C(OCC)O)C)(C)C	160.257	4	8	4.99198	-12.1991	176.167	7.43218	20.43	20.43
C(=C)(C=C(C(=O)OC=C)C)C	-47.1943	186.932		C(CC(C(OCC)O)C)(C)C	160.257	4	8	4.99198	-12.1991	176.167	7.43218	20.04	20.04
C(=C)(CC(=C)C(=O)OC=C)C	-50.0874	182.738		C(CC(C(OCC)O)C)(C)C	160.257	4	8	4.99198	-12.1991	176.167	7.43218	22.02	22.02
C(=C)(OC(=COC)C=N)C	-37.6838	180.766		C(OC(CN)COC)(C)C	147.218	3	6	4.07559	-28.5798	170.917	6.83265	30.08	30.08
C(=C)(C=C(c1c(cco1)C)O)C	-12.1159	238.87		C(CC(C1C(CCO1)C)O)(C)C	172.268	4	8	4.64393	-15.4667	216.544	7.91434	25.02	25.02
C(=C)(C=C(C=C)C(=O)OC)C	-47.0972	188.655		C(CC(C(OC)O)CC)(C)C	160.257	4	8	4.99198	-23.8636	176.682	7.48745	18.23	18.23
C(=C)(C=C(c1cc(oc1)C)O)C	-11.7452	238.628		C(CC(C1COC(C1)C)O)(C)C	172.268	4	8	4.64393	-20.8566	218.039	7.91434	24.77	24.77
C(=C)(CC(=O)CC(=C)C=C)C	-10.6441	192.788		C(CC(CC(CC)C)O)(C)C	158.285	4	8	5.05417	-25.8662	202.322	7.39791	25.23	25.23
C(=C)(CC(=C)CC(=O)C=C)C	-10.6516	233.237		C(CC(CC(CC)O)C)(C)C	158.285	4	8	5.05417	-25.8255	203.747	7.46403	25.42	25.42
C(=C)(CC(=C)CC(=C)C=O)C	-10.6685	233.237		C(CC(CC(CO)C)C)(C)C	158.285	4	8	5.05417	-54.6486	208.606	7.32292	25.88	25.88
C(=C)(CC(=C)C=C)CC(=O)C	-11.2127	192.788		C(CC(CC)C)(CC(O)C)C	158.285	4	8	5.05417	-39.147	206.023	7.72305	25.58	25.58
C(=N)(C=C(C=C)C=C)C	-21.2966	178.713		C(CC(CC)CC)(N)C	129.247	4	8	6.1897	-25.3433	159.06	7.03207	23.94	23.94
C(=C)(C=C(C=C)C=C)N	-24.9651	196.849		C(CC(CC)CC)(N)C	129.247	4	8	6.1897	-25.3433	159.06	7.03207	26.43	26.43
C(=C)(C=C(C=C)C=N)C	-14.8957	178.685		C(CC(CC)CN)(C)C	129.247	4	8	6.1897	-31.2354	159.936	7.13117	24.56	24.56
C(=CC(=CN=C)C=C)(C)C	-51.9041	175.313		C(CC(CC)CNC)(C)C	143.274	4	8	5.58371	-64.2177	158.22	7.1792	25.11	25.11
C(=C)(C=C(C=C)C=NC)C	-51.9041	176.751		C(CC(CC)CNC)(C)C	143.274	4	8	5.58371	-64.2177	158.22	7.1792	25.02	25.02
C(=C)(C=C(C=C)CN=C)C	-51.8758	176.481		C(CC(CC)CNC)(C)C	143.274	4	8	5.58371	-64.2177	158.22	7.1792	26.11	26.11
C(=C)(CC(=CN=C)C=C)C	-51.8758	174.652		C(CC(CC)CNC)(C)C	143.274	4	8	5.58371	-64.2177	158.22	7.1792	26.7	26.7
C(=NC(=CC(=C)C)C=C)(C)C	-38.9516	186.151		C(CC(CC)NC(C)C)(C)C	157.301	4	8	5.08579	-10.4665	181.016	6.97625	24.6	24.6
C(=CC(=NC(=C)C)C=C)(C)C	-38.9516	186.151		C(CC(CC)NC(C)C)(C)C	157.301	4	8	5.08579	-10.4665	181.016	6.97625	24.12	24.12
C(=C)(CC(=NC(=C)C)C=C)C	-18.9836	185.262		C(CC(CC)NC(C)C)(C)C	157.301	4	8	5.08579	-10.4665	181.016	6.97625	25.97	25.97
C(=CC(=C(C)C)C)(C=C)C	-70.0487	174.373		C(CC)(CC(C(C)C)C)C	142.286	3	6	4.21686	-115.867	156.56	7.07438	23.89	23.89
C(=C)(C=C)CC(=C(C)C)C	-62.9639	171.8		C(CC)(CC(C(C)C)C)C	142.286	3	6	4.21686	-115.867	156.56	7.07438	27.54	27.54
C(=C)(OC)OC(=C)C=C(C)C	-80.2337	183.85		C(CC(OC(OC)C)C)(C)C	160.257	3	6	3.74399	-71.9722	165.758	7.32854	31.55	31.55
C(=C)(C=C(OC(=C)OC)C)C	-80.2337	183.85		C(CC(OC(OC)C)C)(C)C	160.257	3	6	3.74399	-71.9722	165.758	7.32854	32.3	32.3
C(=C)(CC(=C)OC(=C)OC)C	-87.7451	179.346		C(CC(OC(OC)C)C)(C)C	160.257	3	6	3.74399	-71.9722	165.758	7.32854	33.66	33.66
C(=C)(C=C(OC)C=C(O)C)C	-13.8696	227.195		C(CC(OC)CC(O)C)(C)C	160.257	3	6	3.74399	-30.9654	202.182	7.48745	27.9	27.9
C(=O)(CC(=CC(=C)C)OC)C	-24.9741	222.908		C(CC(OC)CC(O)C)(C)C	160.257	3	6	3.74399	-30.9654	202.182	7.48745	22.83	22.83
C(=C)(CC(=CC(=C)C)OC)O	-14.3719	233.188		C(CC(OC)CC(O)C)(C)C	160.257	3	6	3.74399	-30.9654	202.182	7.48745	29.29	29.29
C(=C)(CC(=CC(=O)C)OC)C	-24.9741	222.876		C(CC(OC)CC(O)C)(C)C	160.257	3	6	3.74399	-30.9654	202.182	7.48745	23.65	23.65
C(=C)(CC(=CC(=C)O)OC)C	-14.7755	234.639		C(CC(OC)CC(O)C)(C)C	160.257	3	6	3.74399	-30.9654	202.182	7.48745	29.32	29.32
C(=C)(C=C(C=C)OC)C	-61.9156	136.457		C(CC(OC)CC)(C)C	130.231	3	6	4.6072	-88.4449	129.145	6.9047	28	28
C(=CC(=C)OC=C)(C)C	-61.8753	136.192		C(CC(OCC)C)(C)C	130.231	3	6	4.6072	-89.3471	129.145	6.9047	30.12	30.12
C(=C)(C=C(OC=C)C)C	-61.8753	136.192		C(CC(OCC)C)(C)C	130.231	3	6	4.6072	-89.3471	129.145	6.9047	30.83	30.83
C(=C)(CC(=C)OC=C)C	-67.1273	138.883		C(CC(OCC)C)(C)C	130.231	3	6	4.6072	-89.3471	129.145	6.9047	32.33	32.33
C(=CC(=C)C=NC=C)(C)C	-51.9294	175.194		C(CC(CNCC)C)(C)C	143.274	4	8	5.58371	-54.7545	155.747	6.99798	24.79	24.79
C(=C)(C=C(C=NC=C)C)C	-51.9294	175.194		C(CC(CNCC)C)(C)C	143.274	4	8	5.58371	-54.7545	155.747	6.99798	24.35	24.35
C(=C)(CC(=C)C=NC=C)C	-51.898	174.504		C(CC(CNCC)C)(C)C	143.274	4	8	5.58371	-54.7545	155.747	6.99798	26.54	26.54
C(=O)(C=C(N(C(=C)C)C=C)C)C	-33.8533	210.782		C(CC(N(C(C)C)CC)C)(O)C	173.3	4	8	4.61627	-17.7649	213.914	7.56072	20.1	20.1
C(=C)(N(C(=C)CC(=O)C)C=C)C	-35.3215	211.179		C(CC(N(C(C)C)CC)C)(O)C	173.3	4	8	4.61627	-17.7649	213.914	7.56072	22.88	22.88
C(=C)(OC(=CC(=O)C)C)C	-31.167	204.508		C(CC(OC(C)C)C)(O)C	146.23	3	6	4.10313	-23.3651	188.613	7.21633	25.58	25.58
C(=C)(OC(=C)CC(=O)C)C	-14.365	199.843		C(CC(OC(C)C)C)(O)C	146.23	3	6	4.10313	-23.3651	188.613	7.21633	27.09	27.09
C(=C)(OC(=CC(=C)O)C)C	-22.9543	203.628		C(CC(OC(C)C)C)(O)C	146.23	3	6	4.10313	-23.3651	188.613	7.21633	31.85	31.85
C(=C)(C=C(N=C(C)C)C)C	-19.0835	170.238		C(CC(NC(C)C)C)(C)C	143.274	3	6	4.18778	-16.7736	154.106	6.88394	23.66	23.66
C(=C)(CC(=NC(=C)C)C)C	-31.8194	165.748		C(CC(NC(C)C)C)(C)C	143.274	3	6	4.18778	-16.7736	154.106	6.88394	24.81	24.81
C(=C)(NC(=CC(=C)C)C)C	-43.3918	197.921		C(CC(NC(C)C)C)(C)C	143.274	3	6	4.18778	-16.7736	154.106	6.88394	23.55	23.55
C(=C)(CC(=C)NC(=C)C)C	-43.3253	179.99		C(CC(NC(C)C)C)(C)C	143.274	3	6	4.18778	-16.7736	154.106	6.88394	26.64	26.64
C(=C)(CC(=C)N=C(C)C)C	-31.8194	165.748		C(CC(NC(C)C)C)(C)C	143.274	3	6	4.18778	-16.7736	154.106	6.88394	24.9	24.9
C(=CC(=C)N=C)(C)C	-56.8551	157.95		C(CC(NC)C)(C)C	115.22	3	6	5.20743	-67.3741	125.87	7.26679	24.04	24.04
C(=C)(CC(=C)N=C)C	-56.8699	143.311		C(CC(NC)C)(C)C	115.22	3	6	5.20743	-67.3741	125.87	7.26679	26.33	26.33
C(=C)(C=C(N=C)C)C	-56.8551	157.95		C(CC(NC)C)(C)C	115.22	3	6	5.20743	-67.3741	125.87	7.26679	25.02	25.02
C(=C)(CC(=O)C)COC=C	-31.8381	199.846		C(CC(COCC)C)(O)C	146.23	3	6	4.10313	-13.5941	196.266	7.54622	25.98	25.98
C(=C)(CC(=O)COC=C)C	-31.8956	199.846		C(CC(COCC)O)(C)C	146.23	3	6	4.10313	-43.7461	190.665	6.97612	26.3	26.3
C(=CC(=N)COC=COC)(C)C	-12.151	214.287		C(CC(COCCOC)N)(C)C	175.272	3	6	3.42325	-17.6759	211.763	6.85074	26.25	26.25
C(=C)(CC(=N)COC=COC)C	-12.9463	207.536		C(CC(COCCOC)N)(C)C	175.272	3	6	3.42325	-17.6759	211.763	6.85074	28.4	28.4
C(=C)(N(C(=C)CC(=O)C)C)C	-45.47	200.038		C(CC(N(C(C)C)C)C)(O)C	159.273	3	6	3.76712	-15.5011	207.801	7.56891	21.12	21.12
C(=C)(N(C(=CC(=O)C)C)C)C	-39.4796	207.332		C(CC(N(C(C)C)C)C)(O)C	159.273	3	6	3.76712	-15.5011	207.801	7.56891	17.83	17.83
C(=C(c1ccoc1)O)(C=C)C	-13.643	230.834		C(CC)(C(C1CCOC1)O)C	158.241	4	8	5.05558	-11.1235	215.057	7.89377	24.98	24.98
C(=C)(C=C(N(C)C)C=C)C	-45.2986	171.592		C(CC(N(C)C)CC)(C)C	143.274	3	6	4.18778	-50.2141	154.698	6.92461	22.82	22.82
C(=CC(=NC(=C)C)C)(C)C	-19.0835	170.238		C(CC(NC(C)C)C)(C)C	143.274	3	6	4.18778	-16.7736	154.106	6.88394	22.77	22.77
C(=C)(NC(=C)C=C(C)C)C	-33.5807	197.921		C(CC(NC(C)C)C)(C)C	143.274	3	6	4.18778	-16.7736	154.106	6.88394	24.16	24.16
C(=CC(=C)N=C(C)C)(C)C	-19.0835	170.238		C(CC(NC(C)C)C)(C)C	143.274	3	6	4.18778	-16.7736	154.106	6.88394	22.68	22.68
C(=C(C=C)C=C)(C=C)C	-36.113	166.614		C(CC)(C(CC)CC)C	128.259	4	8	6.23738	-86.8384	136.14	5.58543	26.58	26.58
C(=C)(C(=CC(=C)C=C)C)C	-38.9093	174.584		C(CC)(CC(C(C)C)C)C	142.286	4	8	5.62248	-115.867	156.56	7.07438	26.06	26.06
C(=C)(C(=C)C=C(C=C)C)C	-38.9093	174.584		C(CC)(CC(C(C)C)C)C	142.286	4	8	5.62248	-115.867	156.56	7.07438	26.68	26.68
C(=CC(=C)CN=C)(C)C	-39.0795	175.779		C(CC(CNC)C)(C)C	129.247	3	6	4.64227	-67.5864	142.846	7.13117	26.14	26.14
C(=CC(=CN=C)C)(C)C	-52.0045	175.767		C(CC(CNC)C)(C)C	129.247	3	6	4.64227	-67.5864	142.846	7.13117	23.63	23.63
C(=C)(C(=C)CC(=C)C=C)C	-67.8858	173.548		C(CC)(CC(C(C)C)C)C	142.286	4	8	5.62248	-115.867	156.56	7.07438	29.63	29.63
C(=CC(=C)C=NC)(C)C	-52.0045	175.732		C(CC(CNC)C)(C)C	129.247	3	6	4.64227	-67.5864	142.846	7.13117	24.71	24.71
C(=C)(C=C(C=NC)C)C	-52.0045	175.732		C(CC(CNC)C)(C)C	129.247	3	6	4.64227	-67.5864	142.846	7.13117	24.12	24.12
C(=C(N=C)C=C(C=C)C)(C)C	-38.929	186.28		C(CC)(CC(C(C)C)NC)C	157.301	4	8	5.08579	-35.2862	195.578	7.55148	23.7	23.7
C(=C)(CC(=CN=C)C)C	-39.0795	175.808		C(CC(CNC)C)(C)C	129.247	3	6	4.64227	-67.5864	142.846	7.13117	25.32	25.32
C(=C)(CC(=C)C=NC)C	-39.0795	173.785		C(CC(CNC)C)(C)C	129.247	3	6	4.64227	-67.5864	142.846	7.13117	27.04	27.04
C(=C)(C=C(CN=C)C)C	-39.0795	175.779		C(CC(CNC)C)(C)C	129.247	3	6	4.64227	-67.5864	142.846	7.13117	25.93	25.93
C(=C)(C(=NC)C=C(C=C)C)C	-38.929	186.303		C(CC)(CC(C(C)C)NC)C	157.301	4	8	5.08579	-35.2862	195.578	7.55148	24.36	24.36
C(=C)(CC(=C)CN=C)C	-38.7107	158.053		C(CC(CNC)C)(C)C	129.247	3	6	4.64227	-67.5864	142.846	7.13117	28.36	28.36
C(=C)(C(=NC)CC(=C)C=C)C	-19.1087	185.896		C(CC)(CC(C(C)C)NC)C	157.301	4	8	5.08579	-35.2862	195.578	7.55148	27.61	27.61
C(=C)(C=C)CC(=C(C)C)N=C	-19.1087	185.873		C(CC)(CC(C(C)C)NC)C	157.301	4	8	5.08579	-35.2862	195.578	7.55148	25.94	25.94
C(=C)(CC(=C)C=O)C	-34.6444	144.514		C(CC(CO)C)(C)C	116.204	3	6	5.16333	-52.8184	152.356	7.02409	24.55	24.55
C(=C)(OC=C(C=C(C)C)O)C	-13.6148	227.042		C(CC(COC(C)C)O)(C)C	160.257	3	6	3.74399	-28.329	196.202	6.86972	30.91	30.91
C(=C)(OCC(=CC(=C)C)O)C	-14.4571	229.158		C(CC(COC(C)C)O)(C)C	160.257	3	6	3.74399	-28.329	196.202	6.86972	30.36	30.36
C(=C)(OCC(=O)C=C(C)C)C	-46.6542	222.908		C(CC(COC(C)C)O)(C)C	160.257	3	6	3.74399	-28.329	196.202	6.86972	23.81	23.81
C(=C)(CC(=O)COC(=C)C)C	-47.4018	222.877		C(CC(COC(C)C)O)(C)C	160.257	3	6	3.74399	-28.329	196.202	6.86972	25.86	25.86
C(=C)(CC(=COC(=C)C)O)C	-14.5363	227.827		C(CC(COC(C)C)O)(C)C	160.257	3	6	3.74399	-28.329	196.202	6.86972	33.03	33.03
C(=CC(=COC=C)C)(C)C	-58.6947	172.214		C(CC(COCC)C)(C)C	144.258	3	6	4.15921	-85.5782	169.807	6.61507	29.59	29.59
C(=CC(=C)COC=C)(C)C	-78.5698	175.702		C(CC(COCC)C)(C)C	144.258	3	6	4.15921	-85.5782	169.807	6.61507	28.65	28.65
C(=C)(C=C(COC=C)C)C	-78.5698	175.702		C(CC(COCC)C)(C)C	144.258	3	6	4.15921	-85.5782	169.807	6.61507	28.77	28.77
C(=C)(CC(=COC=C)C)C	-78.5698	177.897		C(CC(COCC)C)(C)C	144.258	3	6	4.15921	-85.5782	169.807	6.61507	31.72	31.72
C(=C)(CC(=C)COC=C)C	-79.1719	174.889		C(CC(COCC)C)(C)C	144.258	3	6	4.15921	-85.5782	169.807	6.61507	31.01	31.01
C(=C)(CC(=N)C)COC=C	-13.9778	181.777		C(CC(COCC)C)(N)C	145.246	3	6	4.13092	-72.102	182.848	7.62792	28.15	28.15
C(=CC(=C)C(=C)N)(C=C)C	-16.3036	201.713		C(CC)(CC(C(N)C)C)C	143.274	4	8	5.58371	-12.4818	174.137	7.80323	25.66	25.66
C(=C)(C=C)C=C(C(=C)N)C	-16.1125	201.713		C(CC)(CC(C(N)C)C)C	143.274	4	8	5.58371	-12.4818	174.137	7.80323	25.61	25.61
C(=C)(C=C)CC(=C)C(=C)N	-13.8487	205.306		C(CC)(CC(C(N)C)C)C	143.274	4	8	5.58371	-12.4818	174.137	7.80323	28.52	28.52
C(=C)(C(=NC)C)C=C(C=C)C	-38.921	186.35		C(CC)(CC(C(NC)C)C)C	157.301	4	8	5.08579	-38.7329	195.866	7.83199	24.88	24.88
C(=C(N=C)C)(C=C(C=C)C)C	-38.921	186.328		C(CC)(CC(C(NC)C)C)C	157.301	4	8	5.08579	-38.7329	195.866	7.83199	23.65	23.65
C(=CC(=C)C=C)(C(=NC)C)C	-38.921	186.35		C(CC)(CC(C(NC)C)C)C	157.301	4	8	5.08579	-38.7329	195.866	7.83199	24.46	24.46
C(=C(N=C)C)(CC(=C)C=C)C	-32.2658	185.922		C(CC)(CC(C(NC)C)C)C	157.301	4	8	5.08579	-38.7329	195.866	7.83199	25.97	25.97
C(=C)(C(=NC)C)CC(=C)C=C	-32.2658	185.944		C(CC)(CC(C(NC)C)C)C	157.301	4	8	5.08579	-38.7329	195.866	7.83199	27.64	27.64
C(=C)(CC(=C)C=N)C	-32.7162	141.525		C(CC(CN)C)(C)C	115.22	3	6	5.20743	-39.3701	139.38	7.08076	26.47	26.47
C(=C)(C=C(C=N)C)C	-16.1749	147.352		C(CC(CN)C)(C)C	115.22	3	6	5.20743	-39.3701	139.38	7.08076	23.56	23.56
C(=C)(C(=O)C)CC(=C)C=C	-10.286	183.612		C(CC)(CC(C(O)C)C)C	144.258	4	8	5.54562	-73.63	175.78	7.77978	25.35	25.35
C(=C)(C=C)C=C(C=C)C	-36.113	166.614		C(CC)(CC(CC)C)C	128.259	4	8	6.23738	-86.8384	136.14	6.90106	26.86	26.86
C(=C)(C=C)CC(=C)C=C	-25.7094	166.799		C(CC)(CC(CC)C)C	128.259	4	8	6.23738	-86.8384	136.14	6.90106	29.76	29.76
C(=CC(=N)C=C)(C=C)C	-21.3068	178.674		C(CC)(CC(CC)N)C	129.247	4	8	6.1897	-22.7876	160.183	7.58941	24.27	24.27
C(=C)(C=C)C=C(C=C)N	-21.7223	196.853		C(CC)(CC(CC)N)C	129.247	4	8	6.1897	-22.7876	160.183	7.58941	26.36	26.36
C(=C)(C=C)CC(=N)C=C	-13.6355	178.571		C(CC)(CC(CC)N)C	129.247	4	8	6.1897	-22.7876	160.183	7.58941	27.46	27.46
C(=CC(=C)N=C)(C=C)C	-61.4188	171.665		C(CC)(CC(NC)C)C	129.247	4	8	6.1897	-67.08	143.01	7.69375	25.32	25.32
C(=C)(C=C)C=C(N=C)C	-61.4188	171.665		C(CC)(CC(NC)C)C	129.247	4	8	6.1897	-67.08	143.01	7.69375	26.22	26.22
C(=C)(C=C)CC(=C)N=C	-61.4463	173.414		C(CC)(CC(NC)C)C	129.247	4	8	6.1897	-67.08	143.01	7.69375	27.4	27.4
C(=CC(=NC)C=C)(C=C)C	-51.9063	176.739		C(CC)(CC(NC)CC)C	143.274	4	8	5.58371	-54.4477	159.831	7.62006	24.84	24.84
C(=C)(C=C)CC(=NC)C=C	-51.8778	176.47		C(CC)(CC(NC)CC)C	143.274	4	8	5.58371	-54.4477	159.831	7.62006	28.04	28.04
C(=C)C(C=C)(C=C)C=C	-28.1043	149.479		C(CC)(CC)(CC)CC	128.259	4	8	6.23738	-84.072	138.42	7.50576	31.94	31.94
C(=C)(C=C(C=C)N)C	-43.6496	159.893		C(CC(CC)N)(C)C	115.22	3	6	5.20743	-49.1828	140.333	7.18082	25.27	25.27
C(=CC(=N)C=C)(C)C	-21.4369	147.35		C(CC(CC)N)(C)C	115.22	3	6	5.20743	-49.1828	140.333	7.18082	23.57	23.57
C(=C)(CC(=N)C=C)C	-16.931	141.505		C(CC(CC)N)(C)C	115.22	3	6	5.20743	-49.1828	140.333	7.18082	25.94	25.94
C(=CN=C)(C=C)C=C	-59.7388	152.65		C(CC)(CC)CNC	115.22	4	8	6.94324	-68.4686	132.134	4.26962	27.01	27.01
C(=C)(CC(=O)C=C)C	-34.6309	144.514		C(CC(CC)O)(C)C	116.204	3	6	5.16333	-50.0174	143.863	7.12969	24.06	24.06
C(=C)N=C(C=C)C=C	-59.7758	152.627		C(CC)(CC)NCC	115.22	4	8	6.94324	-62.5341	131.103	7.98201	26.18	26.18
C(=Cc1c(occ1)C)(C=C)C	-84.6891	198.655		C(CC)(CC1C(OCC1)C)C	156.269	4	8	5.11938	-19.3513	194.002	7.90936	23.6	23.6
C(=C)(C=C)Cc1c(occ1)C	-87.9824	198.655		C(CC)(CC1C(OCC1)C)C	156.269	4	8	5.11938	-19.3513	194.002	7.90936	23.1	23.1
C(=Cc1occc1)(C=C)C	-85.0147	183.916		C(CC)(CC1OCCC1)C	142.242	4	8	5.62422	-17.8211	176.432	7.63619	23.94	23.94
C(=C)(C=C)Cc1occc1	-84.986	183.87		C(CC)(CC1OCCC1)C	142.242	4	8	5.62422	-17.8211	176.432	7.63619	23.4	23.4
C(=C(C(=C(C)C)O)OC=C)(C)C	-10.7954	219.601		C(C(C(C(C)C)O)OCC)(C)C	174.284	3	6	3.44266	-34.2801	203.89	7.23509	29.37	29.37
C(=C)(C(C(=C(C)C)O)OC=C)C	-11.4442	226.496		C(C(C(C(C)C)O)OCC)(C)C	174.284	3	6	3.44266	-34.2801	203.89	7.23509	31.42	31.42
C(=C(C(=C(C=C)C)O)OC)(C)C	-10.9781	219.541		C(C(C(C(CC)C)O)OC)(C)C	174.284	3	6	3.44266	-34.3506	203.881	7.69871	27.05	27.05
C(=C)(C(C(=C(C=C)C)O)OC)C	-11.5776	226.412		C(C(C(C(CC)C)O)OC)(C)C	174.284	3	6	3.44266	-34.3506	203.881	7.69871	28.2	28.2
C(=C)(C=C(C=C)C)C	-50.9563	141.255		C(CC(CC)C)(C)C	114.232	3	6	5.25247	-108.342	113.5	6.44364	26.03	26.03
C(=CC(=C)C=C)(C)C	-50.9563	141.255		C(CC(CC)C)(C)C	114.232	3	6	5.25247	-108.342	113.5	6.44364	26.88	26.88
C(=C)(CC(=C)C=C)C	-98.8421	129.184		C(CC(CC)C)(C)C	114.232	3	6	5.25247	-108.342	113.5	6.44364	29.46	29.46
C(=C(C(=C)C(=O)C)C)(C)C	-40.1466	200.6		C(C(C(C(O)C)C)C)(C)C	144.258	3	6	4.15921	-56.6522	175.641	7.61928	21.24	21.24
C(=C)(C(=C(C(=O)C)C)C)C	-40.1466	200.6		C(C(C(C(O)C)C)C)(C)C	144.258	3	6	4.15921	-56.6522	175.641	7.61928	19.4	19.4
C(=C)(C=C)C=C(N)C	-43.6318	159.826		C(CC(CC)C)(N)C	115.22	3	6	5.20743	-29.6368	138.729	7.67729	26.07	26.07
C(=N)(C=C(C=C)C)C	-21.4187	147.353		C(CC(CC)C)(N)C	115.22	3	6	5.20743	-29.6368	138.729	7.67729	23.05	23.05
C(=C)(C=C)CC(=N)C	-16.9043	146.85		C(CC(CC)C)(N)C	115.22	3	6	5.20743	-29.6368	138.729	7.67729	26.86	26.86
C(=NC)(C=CC(=C)C=C)C	-51.8979	176.786		C(CC)(CCC(NC)C)C	143.274	4	8	5.58371	-61.4417	161.294	7.66826	25.51	25.51
C(=CC(=C)N)(C=C)C	-43.6724	159.826		C(CC(CC)C)(N)C	115.22	3	6	5.20743	-29.6368	138.729	7.67729	25.52	25.52
C(=C)(CC(=C)C=C)N	-43.7313	159.849		C(CC(CC)C)(N)C	115.22	3	6	5.20743	-29.6368	138.729	7.67729	27.95	27.95
C(=C)(C=C)CC(=O)C	-34.6507	169.471		C(CC(CC)C)(O)C	116.204	3	6	5.16333	-43.8712	147.494	7.64648	24.21	24.21
C(=C)(C(=C(C=C)C)C)C	-54.3183	155.463		C(C(C(CC)C)C)(C)C	128.259	3	6	4.67803	-119.076	133.649	7.06723	25.21	25.21
C(=C(C(=C)C=C)C)(C)C	-54.3183	155.463		C(C(C(CC)C)C)(C)C	128.259	3	6	4.67803	-119.076	133.649	7.06723	26.57	26.57
C(=C)(C(=O)C(=C(OC)C)C)C	-46.7306	223.012		C(C(C(C(OC)C)C)O)(C)C	160.257	3	6	3.74399	-34.2467	189.807	7.65182	22.5	22.5
C(=C)(C=CC(=C)C=C)OC	-57.2747	174.318		C(CC)(CCC(OC)C)C	144.258	4	8	5.54562	-85.492	169.809	7.50023	28.37	28.37
C(=C)(C=CC(=COC)C=C)OC	-66.7854	204.435		C(CC)(CCC(OC)C)COC	174.284	4	8	4.59021	-55.7688	184.445	7.33827	28.96	28.96
C(=C(C(=C)C(=C)OC)O)(C)C	-16.6411	225.625		C(C(C(C(OC)C)C)O)(C)C	160.257	3	6	3.74399	-34.2467	189.807	7.65182	28.72	28.72
C(=C)(C(=C(C(=C)OC)C)O)C	-16.6411	225.625		C(C(C(C(OC)C)C)O)(C)C	160.257	3	6	3.74399	-34.2467	189.807	7.65182	27.76	27.76
C(=C(C(=O)C(=C)OC)C)(C)C	-46.7338	223.012		C(C(C(C(OC)C)O)C)(C)C	160.257	3	6	3.74399	-34.0037	194.583	7.65182	22.55	22.55
C(=C(C(=C)C(=C)C)O)(OC)C	-16.1387	225.618		C(C(C(C(OC)C)O)C)(C)C	160.257	3	6	3.74399	-34.0037	194.583	7.65182	29.75	29.75
C(=C)(C(=C(C(=C)OC)O)C)C	-15.8667	226.038		C(C(C(C(OC)C)O)C)(C)C	160.257	3	6	3.74399	-34.0037	194.583	7.65182	27.99	27.99
C(=C(C(=C)C(=O)OC)C)(C)C	-66.9607	195.408		C(C(C(C(OC)O)C)C)(C)C	160.257	3	6	3.74399	-18.9543	177.413	7.60021	15.25	15.25
C(=C)(C(=C(C(=O)OC)C)C)C	-66.9607	195.408		C(C(C(C(OC)O)C)C)(C)C	160.257	3	6	3.74399	-18.9543	177.413	7.60021	14.35	14.35
C(=CC(=CC(=COC)C)O)(C)C	-10.1606	239.586		C(CC(CC(COC)C)O)(C)C	174.284	3	6	3.44266	-34.4082	222.109	7.43238	27.43	27.43
C(=C)(C=C(C=C(COC)C)O)C	-10.2976	223.741		C(CC(CC(COC)C)O)(C)C	174.284	3	6	3.44266	-34.4082	222.109	7.43238	27.04	27.04
C(=CC(=CC(=C)COC)O)(C)C	-10.2976	223.741		C(CC(CC(COC)C)O)(C)C	174.284	3	6	3.44266	-34.4082	222.109	7.43238	26.64	26.64
C(=C)(COC)CC(=O)C=C(C)C	-38.0671	228.99		C(CC(CC(COC)C)O)(C)C	174.284	3	6	3.44266	-34.4082	222.109	7.43238	21.49	21.49
C(=C)(C=C(CC(=COC)C)O)C	-10.8846	223.749		C(CC(CC(COC)C)O)(C)C	174.284	3	6	3.44266	-34.4082	222.109	7.43238	28.74	28.74
C(=C)(CC(=O)C=C(COC)C)C	-38.0671	228.99		C(CC(CC(COC)C)O)(C)C	174.284	3	6	3.44266	-34.4082	222.109	7.43238	21.69	21.69
C(=C)(C=C(CC(=C)COC)O)C	-10.9462	222.01		C(CC(CC(COC)C)O)(C)C	174.284	3	6	3.44266	-34.4082	222.109	7.43238	27.95	27.95
C(=C)(CC(=CC(=COC)C)O)C	-10.8846	223.826		C(CC(CC(COC)C)O)(C)C	174.284	3	6	3.44266	-34.4082	222.109	7.43238	28.74	28.74
C(=C)(CC(=O)CC(=COC)C)C	-38.0671	228.994		C(CC(CC(COC)C)O)(C)C	174.284	3	6	3.44266	-34.4082	222.109	7.43238	24.34	24.34
C(=C)(CC(=CC(=C)COC)O)C	-10.9462	222.01		C(CC(CC(COC)C)O)(C)C	174.284	3	6	3.44266	-34.4082	222.109	7.43238	27.94	27.94
C(=C)(CC(=O)CC(=C)COC)C	-52.7627	228.566		C(CC(CC(COC)C)O)(C)C	174.284	3	6	3.44266	-34.4082	222.109	7.43238	23.92	23.92
C(=O)(CC(=C)C=C(C)C)C	-14.0479	200.432		C(CC(CC(O)C)C)(C)C	144.258	3	6	4.15921	-45.6665	177.727	7.47561	21.69	21.69
C(=C)(C=C(CC(=O)C)C)C	-14.0479	200.432		C(CC(CC(O)C)C)(C)C	144.258	3	6	4.15921	-45.6665	177.727	7.47561	20.59	20.59
C(=C)(CC(=C)CC(=O)C)C	-21.1236	202.844		C(CC(CC(O)C)C)(C)C	144.258	3	6	4.15921	-45.6665	177.727	7.47561	23.94	23.94
C(=C)(CC(=CC(=O)C)C)C	-14.0479	200.881		C(CC(CC(O)C)C)(C)C	144.258	3	6	4.15921	-45.6665	177.727	7.47561	21.92	21.92
C(=CC(=C)C=C(OC)C)(C)C	-68.0618	188.658		C(CC(CC(OC)C)C)(C)C	158.285	3	6	3.79063	-85.6617	176.029	7.36927	26.27	26.27
C(=CC(=C)CC(=C)OC)(C)C	-68.4822	182.496		C(CC(CC(OC)C)C)(C)C	158.285	3	6	3.79063	-85.6617	176.029	7.36927	27.63	27.63
C(=CC(=CC(=C)OC)C)(C)C	-68.0618	188.658		C(CC(CC(OC)C)C)(C)C	158.285	3	6	3.79063	-85.6617	176.029	7.36927	25.89	25.89
C(=C)(C=C(C=C(OC)C)C)C	-68.0618	188.658		C(CC(CC(OC)C)C)(C)C	158.285	3	6	3.79063	-85.6617	176.029	7.36927	26	26
C(=C)(C=C(CC(=C)OC)C)C	-68.4822	182.496		C(CC(CC(OC)C)C)(C)C	158.285	3	6	3.79063	-85.6617	176.029	7.36927	27	27
C(=C)(CC(=C)CC(=C)OC)C	-69.1438	175.118		C(CC(CC(OC)C)C)(C)C	158.285	3	6	3.79063	-85.6617	176.029	7.36927	30.44	30.44
C(=C)(CC(=C)C=C(OC)C)C	-68.4822	178.117		C(CC(CC(OC)C)C)(C)C	158.285	3	6	3.79063	-85.6617	176.029	7.36927	28.66	28.66
C(=C)(CC(=CC(=C)OC)C)C	-68.4822	178.117		C(CC(CC(OC)C)C)(C)C	158.285	3	6	3.79063	-85.6617	176.029	7.36927	27.34	27.34
C(=C)(CC(=O)C=C(C)C)C	-13.4381	200.881		C(CC(CC(C)C)O)(C)C	144.258	3	6	4.15921	-34.1034	175.792	7.80507	21.23	21.23
C(=C)(CC(=O)CC(=C)C)C	-21.0468	202.844		C(CC(CC(C)C)O)(C)C	144.258	3	6	4.15921	-34.1034	175.792	7.80507	23.54	23.54
C(=O)(C(=C(C=C)C)C)C	-14.9389	182.462		C(C(C(CC)C)C)(O)C	130.231	3	6	4.6072	-71.7419	159.895	7.79654	19.99	19.99
C(=C)(C=C(C(=O)C)OC)C	-31.1127	204.511		C(CC(C(O)C)OC)(C)C	146.23	3	6	4.10313	-42.2888	177.258	7.49419	23.05	23.05
C(=C)(C=C(C(=C)O)OC)C	-12.9667	203.275		C(CC(C(O)C)OC)(C)C	146.23	3	6	4.10313	-42.2888	177.258	7.49419	29.15	29.15
C(=CC(=O)C(C=C)(OC)C)(C)C	-51.9456	225.793		C(CC(C(OC)(CC)C)O)(C)C	174.284	3	6	3.44266	-34.3343	203.939	7.48671	23	23
C(=C)(CC(=O)C(C=C)(OC)C)C	-69.7793	225.366		C(CC(C(OC)(CC)C)O)(C)C	174.284	3	6	3.44266	-34.3343	203.939	7.48671	25.44	25.44
C(=C)(C=C(C(C=C)(OC)C)O)C	-21.769	226.653		C(CC(C(OC)(CC)C)O)(C)C	174.284	3	6	3.44266	-34.3343	203.939	7.48671	28.6	28.6
C(=O)(C=C(C(=C)OC)C)C	-11.8135	204.511		C(CC(C(OC)C)C)(O)C	146.23	3	6	4.10313	-32.4528	188.545	7.74641	22.46	22.46
C(=O)(CC(=C)C(=C)OC)C	-14.3247	199.855		C(CC(C(OC)C)C)(O)C	146.23	3	6	4.10313	-32.4528	188.545	7.74641	25.44	25.44
C(=C(C(=COC)C=C)C)(C)C	-68.0577	188.658		C(C(C(CC)COC)C)(C)C	158.285	3	6	3.79063	-84.8391	176.028	7.36927	27.52	27.52
C(=C)(CC(=C)C(=C)OC)O	-13.1303	202.959		C(CC(C(OC)C)C)(O)C	146.23	3	6	4.10313	-32.4528	188.545	7.74641	31.94	31.94
C(=CC(=O)C(=C)OC)(C)C	-31.1236	204.511		C(CC(C(OC)C)O)(C)C	146.23	3	6	4.10313	-44.8563	177.293	7.49419	23.25	23.25
C(=C)(CC(=O)C(=C)OC)C	-14.345	200.147		C(CC(C(OC)C)O)(C)C	146.23	3	6	4.10313	-44.8563	177.293	7.49419	25.63	25.63
C(=C)(C(=C(C=C)COC)C)C	-68.4782	182.533		C(C(C(CC)COC)C)(C)C	158.285	3	6	3.79063	-84.8391	176.028	7.36927	25.3	25.3
C(=CC(=C(C=C)OC)C)(C)C	-68.0566	188.658		C(CC(C(OC)CC)C)(C)C	158.285	3	6	3.79063	-84.8398	176.029	7.36927	26.02	26.02
C(=C(C(=N)C=C)C)(C)C	-10.548	160.162		C(C(C(CC)N)C)(C)C	129.247	3	6	4.64227	-38.7502	151.294	7.5279	22.88	22.88
C(=C)(CC(=C(C=C)OC)C)C	-68.4772	178.117		C(CC(C(OC)CC)C)(C)C	158.285	3	6	3.79063	-84.8398	176.029	7.36927	27.58	27.58
C(=CC(=C(C=C)OC)OC)(C)C	-67.3283	204.727		C(CC(C(OC)CC)OC)(C)C	174.284	3	6	3.44266	-54.4511	175.333	7.02458	27.32	27.32
C(=C)(CC(=C(C=C)OC)OC)C	-67.5835	209.754		C(CC(C(OC)CC)OC)(C)C	174.284	3	6	3.44266	-54.4511	175.333	7.02458	28.95	28.95
C(=C(C(=O)C=C)C)(C)C	-14.8741	182.462		C(C(C(CC)O)C)(C)C	130.231	3	6	4.6072	-58.0477	158.35	7.49473	21.2	21.2
C(=C)(C=C(C(=NC)C)C)C	-19.2137	170.616		C(CC(C(NC)C)C)(C)C	143.274	3	6	4.18778	-54.2521	145.502	7.56673	22.87	22.87
C(=C)(CC(=C(N=C)C)C)C	-31.9857	165.981		C(CC(C(NC)C)C)(C)C	143.274	3	6	4.18778	-54.2521	145.502	7.56673	24.58	24.58
C(=C)(CC(=C)C(=NC)C)C	-31.9857	165.951		C(CC(C(NC)C)C)(C)C	143.274	3	6	4.18778	-54.2521	145.502	7.56673	26.73	26.73
C(=CC(=C)C(=O)C)(C)C	-14.9368	182.462		C(CC(C(O)C)C)(C)C	130.231	3	6	4.6072	-56.8601	159.65	7.49473	21.65	21.65
C(=C)(C=C(C(=O)C)C)C	-14.9368	182.462		C(CC(C(O)C)C)(C)C	130.231	3	6	4.6072	-56.8601	159.65	7.49473	20.2	20.2
C(=C)(CC(=C)C(=O)C)C	-47.4582	169.172		C(CC(C(O)C)C)(C)C	130.231	3	6	4.6072	-56.8601	159.65	7.49473	23.68	23.68
C(=C(C(=O)C=C)COC)(C)C	-24.9984	223.002		C(C(C(CC)O)COC)(C)C	160.257	3	6	3.74399	-21.1676	194.614	7.53755	21.36	21.36
C(=C)(C(=C(C=C)O)COC)C	-15.9556	225.913		C(C(C(CC)O)COC)(C)C	160.257	3	6	3.74399	-21.1676	194.614	7.53755	27.08	27.08
C(=CC(=C(C=N)C)C)(C)C	-10.6834	193.538		C(CC(C(CN)C)C)(C)C	143.274	3	6	4.18778	-11.1315	174.121	7.44031	20.94	20.94
C(=C)(CC(=C(C=O)C)C)C	-13.5512	200.881		C(CC(C(CO)C)C)(C)C	144.258	3	6	4.15921	-55.9646	180.459	7.40642	22.39	22.39
C(=CC(=C)C(=COC)C)(O)C	-13.6614	227.198		C(CC(C(COC)C)C)(O)C	160.257	3	6	3.74399	-44.1177	202.15	7.78027	29.79	29.79
C(=C)(C(=C)C=C(O)C)COC	-14.1544	233.169		C(CC(C(COC)C)C)(O)C	160.257	3	6	3.74399	-44.1177	202.15	7.78027	29	29
C(=O)(C=C(C(=C)COC)C)C	-24.939	223.002		C(CC(C(COC)C)C)(O)C	160.257	3	6	3.74399	-44.1177	202.15	7.78027	20.94	20.94
C(=C)(C(=C)CC(=O)C)COC	-47.3404	223.048		C(CC(C(COC)C)C)(O)C	160.257	3	6	3.74399	-44.1177	202.15	7.78027	24.43	24.43
C(=O)(CC(=C)C(=COC)C)C	-24.939	222.908		C(CC(C(COC)C)C)(O)C	160.257	3	6	3.74399	-44.1177	202.15	7.78027	24.8	24.8
C(=C)(CC(=C)C(=COC)C)O	-14.1544	233.191		C(CC(C(COC)C)C)(O)C	160.257	3	6	3.74399	-44.1177	202.15	7.78027	31.57	31.57
C(=C)(C=C(C(=C)COC)C)O	-14.5221	233.213		C(CC(C(COC)C)C)(O)C	160.257	3	6	3.74399	-44.1177	202.15	7.78027	27.4	27.4
C(=C)(C=C(C(=COC)C)C)O	-14.0163	227.248		C(CC(C(COC)C)C)(O)C	160.257	3	6	3.74399	-44.1177	202.15	7.78027	28.1	28.1
C(=C)(C(=C)CC(=C)O)COC	-14.7256	229.387		C(CC(C(COC)C)C)(O)C	160.257	3	6	3.74399	-44.1177	202.15	7.78027	30.92	30.92
C(=CC(=O)C(=C)COC)(C)C	-24.9925	223.002		C(CC(C(COC)C)O)(C)C	160.257	3	6	3.74399	-21.1671	194.614	7.48745	21.21	21.21
C(=C)(C=C(C(=COC)C)O)C	-15.8216	226.909		C(CC(C(COC)C)O)(C)C	160.257	3	6	3.74399	-21.1671	194.614	7.48745	27.44	27.44
C(=C)(C=C(C(=C)COC)O)C	-15.9549	225.913		C(CC(C(COC)C)O)(C)C	160.257	3	6	3.74399	-21.1671	194.614	7.48745	26.86	26.86
C(=C)(CC(=O)C(=C)COC)C	-47.3599	223.053		C(CC(C(COC)C)O)(C)C	160.257	3	6	3.74399	-21.1671	194.614	7.48745	23.8	23.8
C(=C)(CC(=O)C(=COC)C)C	-24.9925	222.876		C(CC(C(COC)C)O)(C)C	160.257	3	6	3.74399	-21.1671	194.614	7.48745	24.14	24.14
C(=CC(=C)C(=C)N)(C)C	-17.9968	174.768		C(CC(C(N)C)C)(C)C	129.247	3	6	4.64227	-22.8514	151.291	7.5279	25.33	25.33
C(=CC(=C)C(=N)C)(C)C	-14.1404	160.17		C(CC(C(N)C)C)(C)C	129.247	3	6	4.64227	-22.8514	151.291	7.5279	23.55	23.55
C(=C)(C=C(C(=N)C)C)C	-14.014	160.17		C(CC(C(N)C)C)(C)C	129.247	3	6	4.64227	-22.8514	151.291	7.5279	22.14	22.14
C(=C)(C=C(C(=C)N)C)C	-17.8281	174.768		C(CC(C(N)C)C)(C)C	129.247	3	6	4.64227	-22.8514	151.291	7.5279	24.41	24.41
C(=C)(CC(=C)C(=C)N)C	-26.6695	176.416		C(CC(C(N)C)C)(C)C	129.247	3	6	4.64227	-22.8514	151.291	7.5279	27.84	27.84
C(=CC(=C(N=C)C)C)(C)C	-19.2137	170.647		C(CC(C(NC)C)C)(C)C	143.274	3	6	4.18778	-54.2521	145.502	7.56673	22.58	22.58
C(=CC(=C)C(=NC)C)(C)C	-19.2137	170.616		C(CC(C(NC)C)C)(C)C	143.274	3	6	4.18778	-54.2521	145.502	7.56673	24.28	24.28
C(=CC(=C(C=COC)C)O)(C)C	-10.9279	229.505		C(CC(C(CCOC)C)O)(C)C	174.284	3	6	3.44266	-34.5412	222.074	7.48524	26.85	26.85
C(=C)(CC(=C(C=COC)C)O)C	-11.5145	223.722		C(CC(C(CCOC)C)O)(C)C	174.284	3	6	3.44266	-34.5412	222.074	7.48524	28.7	28.7
C(=C)(CC(=C(C=C)C)O)C	-18.7226	213.952		C(CC(C(CC)C)O)(C)C	144.258	3	6	4.15921	-39.1886	176.568	7.47561	27.94	27.94
C(=C)(C(=O)C=C(C)C)C	-14.8621	182.462		C(CC(C(C)C)O)(C)C	130.231	3	6	4.6072	-58.0564	158.35	6.85288	21.31	21.31
C(=C)(CC(=O)C(=C)C)C	-47.4147	169.172		C(CC(C(C)C)O)(C)C	130.231	3	6	4.6072	-58.0564	158.35	6.85288	23.59	23.59
C(=CC(=C(C)C)OC=C)(O)C	-13.7687	227.169		C(CC(C(C)C)OCC)(O)C	160.257	3	6	3.74399	-30.7092	202.168	7.48745	30.23	30.23
C(=O)(CC(=C(C)C)OC=C)C	-46.634	222.814		C(CC(C(C)C)OCC)(O)C	160.257	3	6	3.74399	-30.7092	202.168	7.48745	26.32	26.32
C(=C)(CC(=C(C)C)OC=C)O	-14.2676	227.129		C(CC(C(C)C)OCC)(O)C	160.257	3	6	3.74399	-30.7092	202.168	7.48745	32.48	32.48
C(=CC(=C(C=C)C)C)(C)C	-70.0487	174.373		C(CC(C(CC)C)C)(C)C	142.286	3	6	4.21686	-115.867	156.56	6.92375	24.02	24.02
C(=C)(CC(=C(C=C)C)C)C	-62.9639	171.8		C(CC(C(CC)C)C)(C)C	142.286	3	6	4.21686	-115.867	156.56	6.92375	25.89	25.89
C(=C)(C(=C(O)C)C)C=COC	-14.7581	227.08		C(C(C(CCOC)C)C)(O)C	160.257	3	6	3.74399	-44.8764	198.274	7.78027	29.66	29.66
C(=C)(C(=C(C=COC)C)C)O	-13.9579	227.132		C(C(C(CCOC)C)C)(O)C	160.257	3	6	3.74399	-44.8764	198.274	7.78027	28.2	28.2
C(=O)(CC(=C(C=C)C)C)C	-14.0501	200.432		C(CC(C(CC)C)C)(O)C	144.258	3	6	4.15921	-52.0827	177.415	7.732	20.75	20.75
C(=CC(=C(C)C)C=C)(C)C	-70.0487	174.373		C(CC(C(C)C)CC)(C)C	142.286	3	6	4.21686	-115.867	156.56	6.11919	23.66	23.66
C(=C)(CC(=C(C)C)C=C)C	-62.9639	171.8		C(CC(C(C)C)CC)(C)C	142.286	3	6	4.21686	-115.867	156.56	6.11919	26.86	26.86
C(=O)(CC(=C(C)C)C=C)C	-13.5715	200.432		C(CC(C(C)C)CC)(O)C	144.258	3	6	4.15921	-71.6619	177.085	7.53693	21.89	21.89
C(=CC(=C(C)C)C=NC)(C)C	-26.9645	171.897		C(CC(C(C)C)CNC)(C)C	157.301	3	6	3.81434	-37.1874	195.652	6.97625	21.88	21.88
C(=CC(=C(C)C)CN=C)(C)C	-25.7188	171.234		C(CC(C(C)C)CNC)(C)C	157.301	3	6	3.81434	-37.1874	195.652	6.97625	23.4	23.4
C(=O)(C(=C)C(=COC)C)C	-11.8186	204.511		C(C(C(COC)C)C)(O)C	146.23	3	6	4.10313	-46.7329	188.405	7.74641	24.44	24.44
C(=C)(C(=C)C(=O)C)COC	-14.3265	199.866		C(C(C(COC)C)C)(O)C	146.23	3	6	4.10313	-46.7329	188.405	7.74641	24	24
C(=C)(CC(=C(C)C)C=NC)C	-25.7188	170.378		C(CC(C(C)C)CNC)(C)C	157.301	3	6	3.81434	-37.1874	195.652	6.97625	24.83	24.83
C(=C)(CC(=C(C)C)CN=C)C	-18.902	170.119		C(CC(C(C)C)CNC)(C)C	157.301	3	6	3.81434	-37.1874	195.652	6.97625	26.25	26.25
C(=C)(C(=C)C(=O)COC)C	-14.3482	199.866		C(C(C(COC)O)C)(C)C	146.23	3	6	4.10313	-44.8628	177.293	7.43654	24.34	24.34
C(=C)(CC(=C(C)C)C=O)C	-13.4848	200.881		C(CC(C(C)C)CO)(C)C	144.258	3	6	4.15921	-51.6923	178.732	6.82406	22.21	22.21
C(=CC(=COC)C(=C)C)(O)C	-13.5053	227.163		C(CC(C(C)C)COC)(O)C	160.257	3	6	3.74399	-43.9294	202.13	7.53755	29.87	29.87
C(=N)(C(=C(C)C)C=C)C	-10.4978	160.168		C(C(C(N)C)CC)(C)C	129.247	3	6	4.64227	-21.8471	151.288	7.58941	22.73	22.73
C(=O)(C=C(C(=C)C)COC)C	-24.9595	223.002		C(CC(C(C)C)COC)(O)C	160.257	3	6	3.74399	-43.9294	202.13	7.53755	21.19	21.19
C(=O)(CC(=COC)C(=C)C)C	-24.9595	222.908		C(CC(C(C)C)COC)(O)C	160.257	3	6	3.74399	-43.9294	202.13	7.53755	24.88	24.88
C(=C(C(=C)N)C=C)(C)C	-17.7628	174.777		C(C(C(N)C)CC)(C)C	129.247	3	6	4.64227	-21.8471	151.288	7.58941	24.72	24.72
C(=C)(CC(=COC)C(=C)C)O	-14.0818	233.16		C(CC(C(C)C)COC)(O)C	160.257	3	6	3.74399	-43.9294	202.13	7.53755	31.65	31.65
C(=C)(C=C(C(=C)C)COC)O	-14.4287	233.186		C(CC(C(C)C)COC)(O)C	160.257	3	6	3.74399	-43.9294	202.13	7.53755	27.7	27.7
C(=C)(N=C(C(=C(C)C)C)C)C	-25.5921	170.582		C(C(C(NC(C)C)C)C)(C)C	157.301	3	6	3.81434	-11.1148	178.598	7.27451	22.21	22.21
C(=C)(NC(=C)C(=C(C)C)C)C	-50.4553	202.007		C(C(C(NC(C)C)C)C)(C)C	157.301	3	6	3.81434	-11.1148	178.598	7.27451	24.04	24.04
C(=NC(=C)C(=C(C)C)C)(C)C	-25.5921	170.582		C(C(C(NC(C)C)C)C)(C)C	157.301	3	6	3.81434	-11.1148	178.598	7.27451	22.34	22.34
C(=C)(NC(=C(C(=C)C)C)C)C	-49.4041	202.007		C(C(C(NC(C)C)C)C)(C)C	157.301	3	6	3.81434	-11.1148	178.598	7.27451	23.06	23.06
C(=NC(=C(C(=C)C)C)C)(C)C	-25.5921	170.582		C(C(C(NC(C)C)C)C)(C)C	157.301	3	6	3.81434	-11.1148	178.598	7.27451	23.39	23.39
C(=NC)(C(=C(C=C)C)C)C	-19.2147	170.619		C(C(C(NC)C)C)(CC)C	143.274	3	6	4.18778	-54.1032	145.502	7.84556	22.61	22.61
C(=CC(=C(C(=C)C)OC)O)(C)C	-10.6165	217.326		C(CC(C(C(C)C)OC)O)(C)C	174.284	3	6	3.44266	-34.2022	203.896	7.37389	27.67	27.67
C(=C)(C=C(C(=C(C)C)OC)O)C	-10.4163	221.858		C(CC(C(C(C)C)OC)O)(C)C	174.284	3	6	3.44266	-34.2022	203.896	7.37389	27.67	27.67
C(=CC(=O)C(=C(C)C)OC)(C)C	-14.7582	233.071		C(CC(C(C(C)C)OC)O)(C)C	174.284	3	6	3.44266	-34.2022	203.896	7.37389	20.86	20.86
C(=C)(C(C(=O)C=C(C)C)OC)C	-52.4839	228.611		C(CC(C(C(C)C)OC)O)(C)C	174.284	3	6	3.44266	-34.2022	203.896	7.37389	21.96	21.96
C(=C)(C(C(=CC(=C)C)O)OC)C	-11.2922	226.503		C(CC(C(C(C)C)OC)O)(C)C	174.284	3	6	3.44266	-34.2022	203.896	7.37389	28.29	28.29
C(=C)(CC(=C(C(=C)C)OC)O)C	-11.1138	223.269		C(CC(C(C(C)C)OC)O)(C)C	174.284	3	6	3.44266	-34.2022	203.896	7.37389	28.98	28.98
C(=C)(CC(=O)C(=C(C)C)OC)C	-52.1979	229.494		C(CC(C(C(C)C)OC)O)(C)C	174.284	3	6	3.44266	-34.2022	203.896	7.37389	22.87	22.87
C(=C)(CC(=O)C(C(=C)C)OC)C	-69.6978	225.756		C(CC(C(C(C)C)OC)O)(C)C	174.284	3	6	3.44266	-34.2022	203.896	7.37389	24.48	24.48
C(=C)(CC(=C(C(=O)C)C)C)C	-12.8222	228.933		C(CC(C(C(O)C)C)C)(C)C	158.285	3	6	3.79063	-27.5683	204.146	7.67241	21.01	21.01
C(=C)(C=C)C=COC=C	-57.8526	159.107		C(CC)(CCOCC)C	130.231	4	8	6.14293	-85.7947	144.259	6.9047	31.39	31.39
C(=CN(C=C)C=C)(C=C)C	-44.7476	185.437		C(CC)(CN(CC)CC)C	143.274	4	8	5.58371	-56.8566	156.148	6.80132	24.49	24.49
C(=C)(C=C)CN(C=C)C=C	-44.6858	177.93		C(CC)(CN(CC)CC)C	143.274	4	8	5.58371	-56.8566	156.148	6.80132	27.6	27.6
C(=C)(CC(=C(C)C)C(=O)C)C	-12.3605	228.933		C(CC(C(C)C)C(O)C)(C)C	158.285	3	6	3.79063	-31.5232	203.807	7.39791	21.12	21.12
C(=C)(CC(=C(O)C)C(=C)C)C	-34.2057	222.135		C(CC(C(C)C)C(O)C)(C)C	158.285	3	6	3.79063	-31.5232	203.807	7.39791	29.01	29.01
C(=CC(=C(OC)C)OC)(C=C)C=N	-37.5251	237.49		C(CC)(CN)CC(C(OC)C)OC	189.299	4	8	4.22612	-27.5603	227.461	7.697	25.58	25.58
C(=CC(=C)C(=C)C)(C)C	-54.3183	155.463		C(CC(C(C)C)C)(C)C	128.259	3	6	4.67803	-119.076	133.649	5.58543	26.68	26.68
C(=C)(C=C(C(=C)C)C)C	-54.3183	155.463		C(CC(C(C)C)C)(C)C	128.259	3	6	4.67803	-119.076	133.649	5.58543	25.01	25.01
C(=C)(CC(=C)C(=C)C)C	-107.596	147.05		C(CC(C(C)C)C)(C)C	128.259	3	6	4.67803	-119.076	133.649	5.58543	29.38	29.38
C(=N)(C=C(C(=C)C)C)C	-14.2496	160.169		C(CC(C(C)C)C)(N)C	129.247	3	6	4.64227	-24.0286	151.289	7.5279	22.66	22.66
C(=C)(C=C(C(=C)C)C)N	-18.047	174.772		C(CC(C(C)C)C)(N)C	129.247	3	6	4.64227	-24.0286	151.289	7.5279	24.52	24.52
C(=O)(CC(=C)C(=C)C)C	-47.4549	180.99		C(CC(C(C)C)C)(O)C	130.231	3	6	4.6072	-57.7478	159.383	7.49473	24.01	24.01
C(=O)(C=C(C(=C)C)C)C	-14.9305	182.462		C(CC(C(C)C)C)(O)C	130.231	3	6	4.6072	-57.7478	159.383	7.49473	20.72	20.72
C(=NC=C)(C(=C(C)C)C)C	-19.1047	170.304		C(C(C(NCC)C)C)(C)C	143.274	3	6	4.18778	-36.5452	154.061	7.50727	22.74	22.74
C(=C)(C(=C(CC(=O)C)C)C)C	-12.8127	228.876		C(CC(C(C(C)C)C)C)(O)C	158.285	3	6	3.79063	-71.9102	204.553	7.67241	20.2	20.2
C(=Cn1cccc1)(C=C)C	-62.0617	212.989		C(CC)(CN1CCCC1)C	141.258	4	8	5.6634	-27.8544	171.901	7.13127	22.37	22.37
C(=O)(CC(=C)C(=C(C)C)C)C	-12.8127	228.876		C(CC(C(C(C)C)C)C)(O)C	158.285	3	6	3.79063	-71.9102	204.553	7.67241	21.4	21.4
C(=C)(C=C)Cn1cccc1	-61.8688	200.802		C(CC)(CN1CCCC1)C	141.258	4	8	5.6634	-27.8544	171.901	7.13127	21.57	21.57
C(=C)(C(=C)C(C=C)(C)C)O	-10.4724	201.027		C(C(C(O)C)C)(CC)(C)C	144.258	3	6	4.15921	-37.1579	175.648	7.55081	31.91	31.91
C(C(=C)C(=O)C)(C=C)(C)C	-22.2849	186.115		C(C(C(O)C)C)(CC)(C)C	144.258	3	6	4.15921	-37.1579	175.648	7.55081	25	25
C(=CN1C=COC=C1)(C=C)C	-32.0215	227.448		C(CC)(CN1CCOCC1)C	157.257	4	8	5.08721	-46.2829	192.996	6.98114	25.13	25.13
C(=O)(C(=C(C)C)C=C(OC)C)C	-14.697	233.071		C(C(C(O)C)CC(OC)C)(C)C	174.284	3	6	3.44266	-19.0421	214.832	7.69871	20.48	20.48
C(=C)(OC)CC(=C(C)C)C(=O)C	-52.1688	229.104		C(C(C(O)C)CC(OC)C)(C)C	174.284	3	6	3.44266	-19.0421	214.832	7.69871	22.39	22.39
C(=C)(C=C)CN1C=COC=C1	-32.4102	222.885		C(CC)(CN1CCOCC1)C	157.257	4	8	5.08721	-46.2829	192.996	6.98114	28.24	28.24
C(=C)(C(=C)C(=O)C)C	-37.8424	151.651		C(C(C(O)C)C)(C)C	116.204	3	6	5.16333	-49.5309	135.686	7.44833	23.57	23.57
C(=CC(=C(O)C)C(=C)C)(OC)C	-10.2724	223.871		C(C(C(O)C)CC(OC)C)(C)C	174.284	3	6	3.44266	-19.0421	214.832	7.69871	28.1	28.1
C(=CN=C(C=C)C)(C=C)C	-51.9428	175.133		C(CC)(CNC(CC)C)C	143.274	4	8	5.58371	-19.5831	155.829	7.62006	25.75	25.75
C(=C)(C(=C(C)C)CC(=C)OC)O	-10.1197	222.127		C(C(C(O)C)CC(OC)C)(C)C	174.284	3	6	3.44266	-19.0421	214.832	7.69871	28.98	28.98
C(=C)(C(=C(O)C)CC(=C)OC)C	-10.6253	222.057		C(C(C(O)C)CC(OC)C)(C)C	174.284	3	6	3.44266	-19.0421	214.832	7.69871	30.04	30.04
C(=C)(C=C)CN=C(C=C)C	-39.2179	176.29		C(CC)(CNC(CC)C)C	143.274	4	8	5.58371	-19.5831	155.829	7.62006	27.22	27.22
C(=O)(C(=C(C)C)C=C)C	-14.9211	182.462		C(C(C(O)C)CC)(C)C	130.231	3	6	4.6072	-71.0357	159.149	7.55825	20.72	20.72
C(=C)(CC(=O)C(=C(C)C)C)C	-12.2815	228.933		C(CC(C(C(C)C)C)O)(C)C	158.285	3	6	3.79063	-19.3196	203.331	7.32292	20.68	20.68
C(=C)(OC(=C(C)C)C(=O)C)C	-46.7657	222.906		C(C(C(O)C)OC(C)C)(C)C	160.257	3	6	3.74399	-28.2626	194.034	7.22356	25.76	25.76
C(=C)(OC(=C(O)C)C(=C)C)C	-14.123	228.995		C(C(C(O)C)OC(C)C)(C)C	160.257	3	6	3.74399	-28.2626	194.034	7.22356	32.04	32.04
C(=C)(OC(C(=C)C)C(=C)O)C	-15.3625	223.674		C(C(C(O)C)OC(C)C)(C)C	160.257	3	6	3.74399	-28.2626	194.034	7.22356	32.66	32.66
C(=C)(OC(C(=C)C)C(=O)C)C	-46.052	221.939		C(C(C(O)C)OC(C)C)(C)C	160.257	3	6	3.74399	-28.2626	194.034	7.22356	26.45	26.45
C(=C)(OC(=C(C)C)C(=C)O)C	-14.1831	229.286		C(C(C(O)C)OC(C)C)(C)C	160.257	3	6	3.74399	-28.2626	194.034	7.22356	31.58	31.58
C(=C)(C(=C(C=C)C)C)OC	-78.8294	175.657		C(C(C(OC)C)C)(CC)C	144.258	3	6	4.15921	-86.0586	153.471	7.70449	27.19	27.19
C(=C(C(=C)C=C)C)(OC)C	-78.8294	175.657		C(C(C(OC)C)C)(CC)C	144.258	3	6	4.15921	-86.0586	153.471	7.70449	28.81	28.81
C(=O)(C(=C)C(=C)OC)C	-11.6931	195.868		C(C(C(OC)C)C)(O)C	132.203	3	6	4.53847	-39.6633	168.393	7.70936	25.07	25.07
C(=C)(C(=O)C(=C)OC)C	-11.7034	195.868		C(C(C(OC)C)O)(C)C	132.203	3	6	4.53847	-46.8634	168.159	7.44625	25.16	25.16
C(=O)(C(=C(C=C)OC)C)C	-31.0995	204.511		C(C(C(OC)CC)C)(O)C	146.23	3	6	4.10313	-46.948	188.418	7.78707	21.69	21.69
C(=C)(C=C)C=NC=C(OC)OC	-44.8605	207.816		C(CC)(CNCC(OC)OC)C	175.272	4	8	4.56433	-71.1468	202.408	6.85074	27.27	27.27
C(=C)(C=C)C=NC=C	-59.772	152.63		C(CC)(CNCC)C	115.22	4	8	6.94324	-66.9458	131.191	7.26679	26.52	26.52
C(=C)(C(C(=O)C)(C=C)C)C	-22.2821	181.485		C(C(C)C)(C(O)C)(CC)C	144.258	3	6	4.15921	-33.643	175.568	7.55081	25.03	25.03
C(=C)(C(C(=C)O)(C=C)C)C	-45.1568	201.869		C(C(C)C)(C(O)C)(CC)C	144.258	3	6	4.15921	-33.643	175.568	7.55081	32.38	32.38
C(=C)(C=C)OC=C(C=C)C	-57.1699	174.34		C(CC)(COC(CC)C)C	144.258	4	8	5.54562	-85.566	169.809	7.43992	31.31	31.31
C(=C)(C=C)COC(=C)C=C	-50.0023	170.55		C(CC)(COC(CC)C)C	144.258	4	8	5.54562	-85.566	169.809	7.43992	30.42	30.42
C(=C)(Cc1ccc(o1)C)C	-87.489	174.423		C(CC1CCC(O1)C)(C)C	142.242	3	6	4.21816	-18.8033	174.382	7.49347	20.86	20.86
C(=C)(C=Cc1c(cco1)C)C	-84.6868	198.655		C(CCC1C(CCO1)C)(C)C	156.269	4	8	5.11938	-19.2996	194.002	7.66344	23.57	23.57
C(=C(C=C(C(=C)C)C)O)(C)C	-33.4344	226.881		C(C(CC(C(C)C)C)O)(C)C	158.285	3	6	3.79063	-37.871	203.54	7.32292	25.94	25.94
C(=C)(C(=NC(=C)C=C)C)C	-51.9238	176.301		C(CC)(NC(C(C)C)C)C	143.274	4	8	5.58371	-12.9917	154.117	7.50727	25.72	25.72
C(=C)(C=C)NOC=C(C=C)C	-27.1918	199.09		C(CC)(CONC(CC)C)C	159.273	4	8	5.02282	-71.2927	176.956	7.58896	28.67	28.67
C(=C)(C=C)CONC(=C)C=C	-23.9727	201.201		C(CC)(CONC(CC)C)C	159.273	4	8	5.02282	-71.2927	176.956	7.58896	27.95	27.95
C(=NC(=C)C(=C)C)(C=C)C	-51.9238	176.301		C(CC)(NC(C(C)C)C)C	143.274	4	8	5.58371	-12.9917	154.117	7.50727	25.89	25.89
C(=C)(C(=C)NC(=C)C=C)C	-30.635	202.712		C(CC)(NC(C(C)C)C)C	143.274	4	8	5.58371	-12.9917	154.117	7.50727	27.08	27.08
C(=NC(=C(C=C)C)C)(C=C)C	-38.951	186.155		C(CC)(NC(C(CC)C)C)C	157.301	4	8	5.08579	-11.9974	181.007	7.74647	24.8	24.8
C(=C(CC(=C)C(=C)C)O)(C)C	-23.7074	221.962		C(C(CC(C(C)C)C)O)(C)C	158.285	3	6	3.79063	-37.871	203.54	7.32292	28.46	28.46
C(=C)(C(=O)CC(=C(C)C)C)C	-12.2949	228.933		C(C(CC(C(C)C)C)O)(C)C	158.285	3	6	3.79063	-37.871	203.54	7.32292	21.49	21.49
C(=C(CC(=C)C(=O)C)C)(C)C	-12.8198	228.933		C(C(CC(C(O)C)C)C)(C)C	158.285	3	6	3.79063	-49.7832	204.291	7.67241	21.87	21.87
C(=C)(C=C)N=C(C=C)C	-61.4708	173.7		C(CC)(NC(CC)C)C	129.247	4	8	6.1897	-35.8483	139.748	7.28516	26.11	26.11
C(=C)(C=C)NC(=C)C=C	-22.6287	181.439		C(CC)(NC(CC)C)C	129.247	4	8	6.1897	-35.8483	139.748	7.28516	27.1	27.1
C(=C(C=C)C)(CN=C)C	-39.0816	175.781		C(C(CC)C)(CNC)C	129.247	3	6	4.64227	-67.4716	142.87	7.64431	25.91	25.91
C(=C(CC(=NC)C=C)C)(C)C	-25.7104	170.368		C(C(CC(NC)CC)C)(C)C	157.301	3	6	3.81434	-37.8701	195.614	7.55148	25	25
C(=C)(C(=O)C=C(OC)C)C	-31.1197	204.511		C(C(CC(OC)C)O)(C)C	146.23	3	6	4.10313	-31.6352	186.901	7.49419	23.13	23.13
C(=C)(C(=O)CC(=C)OC)C	-14.3432	199.855		C(C(CC(OC)C)O)(C)C	146.23	3	6	4.10313	-31.6352	186.901	7.49419	25.03	25.03
C(=C)(C(=CC(=C)OC)O)C	-13.941	203.583		C(C(CC(OC)C)O)(C)C	146.23	3	6	4.10313	-31.6352	186.901	7.49419	28.66	28.66
C(=C)(C(=C)C=C)C	-72.0455	107.651		C(C(CC)C)(C)C	100.205	3	6	5.98773	-118.663	83.829	6.49896	29.19	29.19
C(=C(C=C)C)(C=C)C	-50.9563	141.255		C(C(CC)C)(CC)C	114.232	3	6	5.25247	-108.342	113.5	6.88678	26.3	26.3
C(=C)C(=NCc1occc1)C	-27.5911	227.451		C(CC)(NCC1OCCC1)C	157.257	4	8	5.08721	-41.5405	191.25	7.7127	21.88	21.88
C(=C(C=C)C)(C=NC)C	-52.0043	175.734		C(C(CC)C)(CNC)C	129.247	3	6	4.64227	-67.4716	142.87	7.64431	23.93	23.93
C(=C)(C(=COC)C)C=C	-61.933	136.457		C(C(CC)C)(COC)C	130.231	3	6	4.6072	-90.5154	128.951	7.45227	30.12	30.12
C(=C)(C(=C)C=C)COC	-67.1786	137.746		C(C(CC)C)(COC)C	130.231	3	6	4.6072	-90.5154	128.951	7.45227	29.48	29.48
C(=C)OCC(=C(C=C)C)COC	-67.5443	193.257		C(C(CC)C)(COCC)COC	174.284	3	6	3.44266	-56.1134	186.126	7.27382	28.94	28.94
C(=C)(C=C)C(=N)C	-26.9082	118.319		C(C(CC)C)(N)C	101.193	3	6	5.92926	-60.0365	111.22	7.72091	25.88	25.88
C(=C)(C(=C)C=C)N	-37.1222	147.39		C(C(CC)C)(N)C	101.193	3	6	5.92926	-60.0365	111.22	7.72091	27.92	27.92
C(=C)ONC(=C(C=C)C)C	-15.8415	168.071		C(C(CC)C)(NOCC)C	145.246	3	6	4.13092	-71.1704	144.738	7.64656	27.4	27.4
C(=C)(C=C)C(=O)C	-32.3729	133.967		C(C(CC)C)(O)C	102.177	3	6	5.87216	-39.6077	130.584	7.6886	23.89	23.89
C(=C(C=C)C=C)(C)C	-50.9563	141.255		C(C(CC)CC)(C)C	114.232	3	6	5.25247	-108.342	113.5	7.73385	26.22	26.22
C(=C)(C=C)NOC(=C)C=C	-22.8165	182.047		C(CC)(NOC(CC)C)C	145.246	4	8	5.5079	-71.1691	144.74	7.5526	28.88	28.88
C(=C)(C=C)OC(=O)C=C	-18.1309	143.874		C(CC)(OC(CC)O)C	132.203	4	8	6.0513	-21.1758	156.829	7.44625	22.06	22.06
C(=C)(C=C)OC(=C)C=C	-46.1594	159.552		C(CC)(OC(CC)C)C	130.231	4	8	6.14293	-89.8715	129.33	6.95862	31.6	31.6
C(=C1C=CC(=C(N)C)C1)(C)C	-32.9471	214.761		C(C1CCC(C(N)C)C1)(C)C	155.285	3	6	3.86386	-18.4381	195.084	7.85511	19.35	19.35
C(=Cc1c(C=C)occ1)(C)C	-84.6867	198.599		C(CC1C(CC)OCC1)(C)C	156.269	4	8	5.11938	-19.2955	194.002	7.58268	24.18	24.18
C(=C1C=C(C(=C1)C)C)(C)C	-69.5371	180.751		C(C1CC(C(C1)C)C)(C)C	140.27	3	6	4.27746	-103.026	160.867	7.36325	20.26	20.26
C(=C1C=C(C(=C)C1)C)(C)C	-86.6939	174.564		C(C1CC(C(C1)C)C)(C)C	140.27	3	6	4.27746	-103.026	160.867	7.36325	22.09	22.09
C(=C)(Cc1c(C=C)occ1)C	-87.9768	196.626		C(CC1C(CC)OCC1)(C)C	156.269	4	8	5.11938	-19.2955	194.002	7.58268	23.68	23.68
C(=C)(C=C1C(=C)N(C=CO1)C)C	-32.9853	221.879		C(CC1C(N(CCO1)C)C)(C)C	171.284	4	8	4.67061	-30.3423	184.44	7.6551	26.84	26.84
C(=C1CC(=C)C(=C)C1)(C)C	-98.3334	174.188		C(C1CC(C(C1)C)C)(C)C	140.27	3	6	4.27746	-103.026	160.867	7.36325	26.95	26.95
C(=C)(C=C1C=CC(=C1)C)C	-77.8848	181.593		C(CC1CCC(C1)C)(C)C	140.27	4	8	5.70329	-109.716	168.101	7.56611	23.33	23.33
C(=CC1=CC(=C)C=C1)(C)C	-77.8848	181.593		C(CC1CCC(C1)C)(C)C	140.27	4	8	5.70329	-109.716	168.101	7.56611	23.19	23.19
C(=C)(C1=CC(=C(C1)C)C)C	-86.6939	174.564		C(C1CC(C(C1)C)C)(C)C	140.27	3	6	4.27746	-103.026	160.867	7.36325	22.67	22.67
C(=C)(C=C1C=CC(=C)C1)C	-83.7612	180.986		C(CC1CCC(C1)C)(C)C	140.27	4	8	5.70329	-109.716	168.101	7.56611	23.91	23.91
C(=C)(CC1=CC(=C)C=C1)C	-83.7612	187.553		C(CC1CCC(C1)C)(C)C	140.27	4	8	5.70329	-109.716	168.101	7.56611	24.36	24.36
c1(ccc(o1)C=C(C=NC)C)C	-67.3942	252.462		C(CC1CCC(O1)C)(CNC)C	171.284	4	8	4.67061	-44.9611	202.99	7.91286	21.58	21.58
N(=C)CC(=Cc1ccc(o1)C)C	-45.3527	252.512		C(CC1CCC(O1)C)(CNC)C	171.284	4	8	4.67061	-44.9611	202.99	7.91286	22.93	22.93
c1(ccc(o1)CC(=CN=C)C)C	-45.3527	252.5		C(CC1CCC(O1)C)(CNC)C	171.284	4	8	4.67061	-44.9611	202.99	7.91286	20.47	20.47
C(=C)(C=NC)Cc1ccc(o1)C	-45.3527	252.511		C(CC1CCC(O1)C)(CNC)C	171.284	4	8	4.67061	-44.9611	202.99	7.91286	21.09	21.09
C(=C)(Cc1ccc(o1)C)CN=C	-19.398	252.497		C(CC1CCC(O1)C)(CNC)C	171.284	4	8	4.67061	-44.9611	202.99	7.91286	22.44	22.44
C(=Cc1ccccc1)(C)C	-49.553	189.283		C(CC1CCCCC1)(C)C	140.27	4	8	5.70329	-87.01	172.691	7.86998	19.63	19.63
C(=C)(Cc1ccccc1)C	-66.829	184.246		C(CC1CCCCC1)(C)C	140.27	4	8	5.70329	-87.01	172.691	7.86998	18.98	18.98
C(=Cc1cccnc1)(C)C	-16.6065	208.436		C(CC1CCCNC1)(C)C	141.258	4	8	5.6634	-18.3576	164.715	7.33478	18.09	18.09
C(=C)(Cc1cccnc1)C	-15.2191	203.154		C(CC1CCCNC1)(C)C	141.258	4	8	5.6634	-18.3576	164.715	7.33478	17.55	17.55
C(=C)(Cc1ccncc1)C	-15.249	203.153		C(CC1CCNCC1)(C)C	141.258	4	8	5.6634	-25.5494	164.721	4.62942	17.39	17.39
C(=Cc1ccncc1)(C)C	-16.6256	208.431		C(CC1CCNCC1)(C)C	141.258	4	8	5.6634	-25.5494	164.721	4.62942	17.93	17.93
C(=Cc1ccoc1)(C=NC)C	-49.6701	224.994		C(CC1CCOC1)(CNC)C	157.257	4	8	5.08721	-45.822	198.782	7.74456	21.9	21.9
C(=Cc1ccoc1)(CN=C)C	-28.5245	227.228		C(CC1CCOC1)(CNC)C	157.257	4	8	5.08721	-45.822	198.782	7.74456	23.25	23.25
C(=CN=C)(C=C1C=COC1)C	-27.701	199.532		C(CC1CCOC1)(CNC)C	157.257	4	8	5.08721	-45.822	198.782	7.74456	25.1	25.1
C(=CN=C)(Cc1ccoc1)C	-28.5245	227.219		C(CC1CCOC1)(CNC)C	157.257	4	8	5.08721	-45.822	198.782	7.74456	20.74	20.74
C(=C)(C=C1C=COC1)C=NC	-27.701	199.574		C(CC1CCOC1)(CNC)C	157.257	4	8	5.08721	-45.822	198.782	7.74456	26.14	26.14
C(=C)(C=NC)Cc1ccoc1	-28.5245	227.228		C(CC1CCOC1)(CNC)C	157.257	4	8	5.08721	-45.822	198.782	7.74456	21.37	21.37
C(=C)(Cc1ccoc1)CN=C	-27.4046	205.155		C(CC1CCOC1)(CNC)C	157.257	4	8	5.08721	-45.822	198.782	7.74456	22.71	22.71
C(=C)(C=C1OC=CC(=C)C1)C	-16.6604	212.436		C(CC1OCCC(C1)C)(C)C	156.269	4	8	5.11938	-37.3125	194.002	7.62692	29.59	29.59
C(=C)(CC1=CC(=C)C=CO1)C	-16.6604	200.402		C(CC1OCCC(C1)C)(C)C	156.269	4	8	5.11938	-37.3125	194.002	7.62692	29.56	29.56
C(=Cc1occc1)(CN=C)C	-28.4661	227.228		C(CC1OCCC1)(CNC)C	157.257	4	8	5.08721	-46.1593	198.784	7.74456	23.11	23.11
C(=Cc1occc1)(C=NC)C	-49.6387	224.994		C(CC1OCCC1)(CNC)C	157.257	4	8	5.08721	-46.1593	198.784	7.74456	21.76	21.76
C(=CN=C)(Cc1occc1)C	-28.4661	227.219		C(CC1OCCC1)(CNC)C	157.257	4	8	5.08721	-46.1593	198.784	7.74456	20.61	20.61
C(=C)(Cc1occc1)CN=C	-27.3536	205.155		C(CC1OCCC1)(CNC)C	157.257	4	8	5.08721	-46.1593	198.784	7.74456	22.57	22.57
C(=C)(C=NC)Cc1occc1	-28.4661	227.228		C(CC1OCCC1)(CNC)C	157.257	4	8	5.08721	-46.1593	198.784	7.74456	21.23	21.23
C(=C(C=C)COC=C)(C)C	-78.5681	175.702		C(C(CC)COCC)(C)C	144.258	3	6	4.15921	-85.5778	169.807	6.76182	28.95	28.95
C(=C)(C=CC(=C)C(=C)C)N	-16.5454	201.713		C(CCC(C(C)C)C)(N)C	143.274	4	8	5.58371	-18.8565	174.139	7.50727	26.14	26.14
C(=C(C=C)COC=C)(O)C	-13.2724	206.322		C(C(CC)COCC)(O)C	146.23	3	6	4.10313	-36.8203	190.712	7.54622	30.83	30.83
C(=C(C=C)N)(C=C)C	-43.6231	159.887		C(C(CC)N)(CC)C	115.22	3	6	5.20743	-49.3689	140.22	7.6211	25.36	25.36
C(=C)(C=CC(=C)C(=N)C)C	-12.8267	199.941		C(CCC(C(N)C)C)(C)C	143.274	4	8	5.58371	-12.699	174.137	7.44031	24.16	24.16
C(=C)(C=CC(=C)C(=C)N)C	-16.3791	201.713		C(CCC(C(N)C)C)(C)C	143.274	4	8	5.58371	-12.699	174.137	7.44031	25.5	25.5
C(=C(ON)C=C(C=C)C)(C)C	-12.8407	202.564		C(C(ON)CC(CC)C)(C)C	159.273	3	6	3.76712	-48.1412	175.711	7.48914	26.15	26.15
C(=C1C(=C(C)C)OC=C1)(C)C	-13.9509	210.869		C(C1C(C(C)C)CCO1)(C)C	156.269	3	6	3.83953	-21.7733	174.59	7.43148	20.11	20.11
C(=C)(C1C(=C(C)C)C=CO1)C	-46.7388	185.544		C(C1C(C(C)C)CCO1)(C)C	156.269	3	6	3.83953	-21.7733	174.59	7.43148	28.35	28.35
C(=C)(C1=COCC1=C(C)C)C	-46.493	200.886		C(C1C(C(C)C)COC1)(C)C	156.269	3	6	3.83953	-21.793	174.59	7.02741	27.53	27.53
C(=C)(C1=C(C(=C)C)COC1)C	-14.9055	201.366		C(C1C(C(C)C)COC1)(C)C	156.269	3	6	3.83953	-21.793	174.59	7.02741	23.74	23.74
C(=C1C(=C(C=C1)C)C)(C)C	-69.5371	180.751		C(C1C(C(CC1)C)C)(C)C	140.27	3	6	4.27746	-103.026	160.867	7.70425	20.31	20.31
C(=C1C(=C(CO1)C)C)(C=C)C	-46.4931	200.886		C(C1C(C(CO1)C)C)(CC)C	156.269	3	6	3.83953	-21.7916	174.59	7.96539	25.14	25.14
C(=C)(C=CC(=C)C=C)C	-36.113	166.614		C(CCC(CC)C)(C)C	128.259	4	8	6.23738	-86.8384	136.14	6.10051	26.82	26.82
C(=C)(C(=O)C=C)C	-32.3606	133.967		C(C(CC)O)(C)C	102.177	3	6	5.87216	-36.3981	127.214	7.19398	23.56	23.56
C1(=C(C(C(=C)C=C)OC1)C)C	-14.6278	193.73		C(C1C(C(CO1)C)C)(CC)C	156.269	3	6	3.83953	-21.7916	174.59	7.96539	27.35	27.35
C(=N)(C=CC(=C)C=C)C	-26.4936	178.715		C(CCC(CC)C)(N)C	129.247	4	8	6.1897	-27.613	159.046	7.64431	24.95	24.95
C(=C)(C=CC(=C)C=C)N	-25.0106	196.849		C(CCC(CC)C)(N)C	129.247	4	8	6.1897	-27.613	159.046	7.64431	26.36	26.36
C(=C(C=C)O)(COC=C)C	-13.5722	206.299		C(C(CC)O)(COCC)C	146.23	3	6	4.10313	-46.4919	190.464	7.54622	29.99	29.99
C(=C(C=C)OC=C)(C)C	-61.8687	136.192		C(C(CC)OCC)(C)C	130.231	3	6	4.6072	-89.6652	129.145	6.9047	30.45	30.45
C(=C)(C(=O)OC=C)C	-55.6269	123.7		C(C(OCC)O)(C)C	118.176	3	6	5.07717	-21.9347	145.865	6.92168	19.48	19.48
C(=C)(C(=O)OCC(=C(C)C)C)C	-69.7013	210.531		C(C(OCC(C(C)C)C)O)(C)C	174.284	3	6	3.44266	-11.5004	194.391	7.23509	16.74	16.74
C(=C(OC=C)C)(OC=C)C	-90.5261	166.861		C(C(OCC)C)(OCC)C	146.23	3	6	4.10313	-79.0419	142.411	6.43597	34.12	34.12
C(=C)(C(=C)OC=C)O	-17.3146	166.899		C(C(OCC)C)(O)C	118.176	3	6	5.07717	-42.2766	148.786	7.39195	33.38	33.38
C(=C)(C(=O)C)OC=C	-11.9304	161.401		C(C(OCC)C)(O)C	118.176	3	6	5.07717	-42.2766	148.786	7.39195	27.61	27.61
C(=C)(C(=C)C(=C)C(=C)N)C	-13.8297	199.974		C(C(C(C(N)C)C)C)(C)C	143.274	4	8	5.58371	-11.7532	152.97	7.64676	28.36	28.36
C(=C)(C(=C)C(=C)C(=O)C)C	-12.7815	180.175		C(C(C(C(O)C)C)C)(C)C	144.258	4	8	5.54562	-56.6522	175.641	7.61928	25.19	25.19
C(=C)(C(=COC=C)OC)C	-90.5268	167.074		C(C(OC)COCC)(C)C	146.23	3	6	4.10313	-79.0767	142.393	6.52245	32.43	32.43
C(=C)(C(=C(C=C)C=C)C)N	-15.997	201.713		C(C(C(CC)CC)C)(N)C	143.274	4	8	5.58371	-11.9608	174.137	7.50727	25.43	25.43
C(=C(C=C)OC)(C=C)OC	-90.5284	167.282		C(C(OC)CC)(OC)CC	146.23	3	6	4.10313	-79.1593	142.411	6.65522	29.51	29.51
C(=C(C=CN=C)C)(C)C	-52.0054	175.759		C(C(CCNC)C)(C)C	129.247	3	6	4.64227	-67.7669	142.773	7.13117	23.96	23.96
C(=C)(C(=CC(=C(C)C)O)OC)C	-10.4608	220.423		C(C(OC)CC(C(C)C)O)(C)C	174.284	3	6	3.44266	-34.3001	214.674	7.30863	27.61	27.61
C(=C(C=C)OC)(C=C)C	-61.9177	136.457		C(C(OC)CC)(CC)C	130.231	3	6	4.6072	-88.4146	129.145	7.45227	28.24	28.24
C(=C(C=COC=COC)C)(C)C	-67.2743	211.927		C(C(CCOCCOC)C)(C)C	174.284	3	6	3.44266	-56.2015	186.126	6.23183	30.05	30.05
C(=C)(C(=C)C=N)C	-22.9209	118.327		C(C(CN)C)(C)C	101.193	3	6	5.92926	-45.2747	111.358	7.02776	26.08	26.08
C(=C)(C(=O)CC(=C(C)C)OC)C	-52.1932	229.104		C(C(OC)CC(C(C)C)O)(C)C	174.284	3	6	3.44266	-34.3001	214.674	7.30863	23.08	23.08
C(=C)(C(=CC(=C(C)C)OC)O)C	-10.1798	220.456		C(C(OC)CC(C(C)C)O)(C)C	174.284	3	6	3.44266	-34.3001	214.674	7.30863	27.5	27.5
C(=C)(C(=C)C(=C)C(=O)OC)C	-51.024	182.715		C(C(C(C(OC)O)C)C)(C)C	160.257	4	8	4.99198	-18.9543	177.413	7.60021	20.81	20.81
C(=C)(C(C(=C)C)C(=O)C=C)C	-16.4971	192.812		C(C(C(C)C)C(CC)O)(C)C	158.285	4	8	5.05417	-19.3167	203.331	6.66925	25.73	25.73
C(=C)(C(=O)OC(=C(C)C)C)C	-66.9578	197.122		C(C(OC(C(C)C)C)O)(C)C	160.257	3	6	3.74399	-12.3855	176.242	7.30178	17.37	17.37
C(=C)(C(=C)C(=C)C=C)C	-26.0447	166.646		C(C(C(CC)C)C)(C)C	128.259	4	8	6.23738	-119.076	133.649	7.06723	29.45	29.45
C(=C)(C(=C(C=C)C)C)C=C	-38.9093	174.584		C(C(C(CC)C)C)(CC)C	142.286	4	8	5.62248	-115.867	156.56	6.72929	26.24	26.24
C(=C)(C(=C)C=O)C	-32.367	133.967		C(C(CO)C)(C)C	102.177	3	6	5.87216	-40.1068	135.386	6.96207	24.58	24.58
C(=C(C(=C)C=C)C)(C=NC)C	-38.9231	186.337		C(C(C(CC)C)C)(CNC)C	157.301	4	8	5.08579	-35.4992	195.786	7.79121	24.95	24.95
C(=C(C(=C)C=C)C)(CN=C)C	-32.2494	185.931		C(C(C(CC)C)C)(CNC)C	157.301	4	8	5.08579	-35.4992	195.786	7.79121	26.34	26.34
C(=CN=C)(C(=C(C=C)C)C)C	-38.9231	186.315		C(C(C(CC)C)C)(CNC)C	157.301	4	8	5.08579	-35.4992	195.786	7.79121	23.91	23.91
C(=C)(C(=O)C=C)OC	-11.9331	165.694		C(C(OC)C)(CC)O	118.176	3	6	5.07717	-45.2693	150.091	7.52424	25.78	25.78
C(=C)(C(=O)C)N(C(=C(C)C)C)C	-39.0095	215.973		C(C(N(C(C(O)C)C)C)C)(C)C	173.3	3	6	3.4622	-17.052	211.888	7.79848	20.34	20.34
C(=C)(C=C)N(C(=C(C)C)C)C	-44.7948	185.215		C(C(N(C(CC)C)C)C)(C)C	157.301	3	6	3.81434	-44.813	164.687	7.45422	24.29	24.29
C(=O)(C(C(=COC=C)C)(C)C)C	-51.9516	225.637		C(C(O)C)(C(COCC)C)(C)C	174.284	3	6	3.44266	-34.245	214.895	7.44534	26.84	26.84
C(=C)(C(C(=O)C)(C)C)COC=C	-69.7793	225.103		C(C(O)C)(C(COCC)C)(C)C	174.284	3	6	3.44266	-34.245	214.895	7.44534	26.36	26.36
C(=C)(C(C(=COC=C)C)(C)C)O	-12.0354	222.5		C(C(O)C)(C(COCC)C)(C)C	174.284	3	6	3.44266	-34.245	214.895	7.44534	34.29	34.29
C(=C)(C(C(=C)COC=C)(C)C)O	-11.9136	234.42		C(C(O)C)(C(COCC)C)(C)C	174.284	3	6	3.44266	-34.245	214.895	7.44534	33.66	33.66
C(=N)(C(=C)C(=C)C=C)C	-13.5383	178.645		C(C(C(CC)C)C)(N)C	129.247	4	8	6.1897	-22.3106	151.292	7.82117	27.14	27.14
C(=C)(C(=C)C(=C)C=C)N	-20.3878	196.942		C(C(C(CC)C)C)(N)C	129.247	4	8	6.1897	-22.3106	151.292	7.82117	28.42	28.42
C(=C(C(=C)C=C)C=C)(C)C	-38.9093	174.584		C(C(C(CC)C)CC)(C)C	142.286	4	8	5.62248	-115.867	156.56	6.92375	26.77	26.77
C(=C)(C(=C(C=C)C)C=C)C	-38.9093	174.584		C(C(C(CC)C)CC)(C)C	142.286	4	8	5.62248	-115.867	156.56	6.92375	25.75	25.75
C(=C)(C=C)C(=C(N)C)C=C	-15.6069	201.714		C(C(C(CC)C)CC)(N)C	143.274	4	8	5.58371	-11.6772	174.142	7.75659	26.53	26.53
C(C(=C)O)(C=CC(=C)C)(C)C	-33.2016	223.735		C(C(O)C)(CCC(C)C)(C)C	158.285	3	6	3.79063	-12.928	203.838	6.9573	27.81	27.81
C(C(=O)C)(C=CC(=C)C)(C)C	-14.8216	217.358		C(C(O)C)(CCC(C)C)(C)C	158.285	3	6	3.79063	-12.928	203.838	6.9573	20.51	20.51
C(=C)(C(=C(C=C)C)C=C)N	-16.0666	201.714		C(C(C(CC)C)CC)(N)C	143.274	4	8	5.58371	-11.6772	174.142	7.75659	25.51	25.51
C(=C)(C(=C)N=C)C	-34.3365	132.532		C(C(NC)C)(C)C	101.193	3	6	5.92926	-68.134	95.5783	7.24642	26.43	26.43
C(=C)(C(=C(C=C)C)C)CN=C	-32.2494	185.931		C(C(C(CC)C)C)(CNC)C	157.301	4	8	5.08579	-35.4992	195.786	7.79121	25.73	25.73
C(=C)(C(=C(C=C)C)C)C=NC	-38.9231	186.337		C(C(C(CC)C)C)(CNC)C	157.301	4	8	5.08579	-35.4992	195.786	7.79121	24.51	24.51
C(=C)(N(NC(=C)C(=C)C)C)C	-10.7832	215.887		C(C(NN(C(C)C)C)C)(C)C	158.289	3	6	3.79054	-67.4737	177.323	6.94518	25.4	25.4
C(C(=CC(=C)C)N=C)(C)(C)C	-18.3587	170.21		C(C(NC)CC(C)C)(C)(C)C	157.301	3	6	3.81434	-18.0298	178.616	7.00866	23.34	23.34
C(=C)(C(=C)N=C)C=C	-59.8114	152.657		C(C(NC)C)(CC)C	115.22	4	8	6.94324	-67.0309	125.935	7.72769	27.3	27.3
C(=C)(C(=Cc1occc1)C)C	-84.6874	198.609		C(C(CC1OCCC1)C)(C)C	156.269	4	8	5.11938	-19.3147	194.002	7.48679	23.87	23.87
c1(occc1)CC(=C)C(=C)C	-87.9785	198.675		C(C(CC1OCCC1)C)(C)C	156.269	4	8	5.11938	-19.3147	194.002	7.48679	23.34	23.34
C(=C)(C(=C)C=NC=C)C	-61.4601	173.722		C(C(CNCC)C)(C)C	129.247	4	8	6.1897	-62.5199	140.588	6.91499	26.26	26.26
C(=C)(C=Cc1n(ccc1)C)C	-62.0251	219.818		C(CCC1N(CCC1)C)(C)C	155.285	4	8	5.15182	-12.4158	181.474	7.30413	22.01	22.01
C(=C)(C=Cc1occc1)C	-85.0146	183.916		C(CCC1OCCC1)(C)C	142.242	4	8	5.62422	-17.8198	176.432	7.13664	23.95	23.95
C(=C)(C=CN(C(=C)C=C)C)C	-45.8759	193.742		C(CCN(C(CC)C)C)(C)C	157.301	4	8	5.08579	-47.6837	172.753	7.09578	24.78	24.78
C(=C)(C=CN(C(=C)C=O)C)C	-34.0733	204.665		C(CCN(C(CO)C)C)(C)C	159.273	4	8	5.02282	-27.3083	208.201	7.29576	22.15	22.15
C(=C)(C=CN(C=C)C(=O)COC)C	-30.4389	264.92		C(CCN(C(COC)O)CC)(C)C	189.299	4	8	4.22612	-11.2822	226.634	7.14707	17.3	17.3
C(=O)(C=CN(C=C)C=C)C	-36.5646	202.743		C(CCN(CC)CC)(O)C	145.246	4	8	5.5079	-15.2237	190.721	7.03536	20.4	20.4
C(=C)(C=Cn1c(ccc1)C)C	-62.0805	219.819		C(CCN1C(CCC1)C)(C)C	155.285	4	8	5.15182	-12.4663	181.992	7.30413	22.27	22.27
C(=C)(C=CN1C(=COC=C1)C)C	-32.3483	231.507		C(CCN1C(COCC1)C)(C)C	171.284	4	8	4.67061	-31.4186	185.438	7.17943	24.8	24.8
C(=C)(C=CN1C(=C)COC=C1)C	-32.8367	222.238		C(CCN1C(COCC1)C)(C)C	171.284	4	8	4.67061	-31.4186	185.438	7.17943	24.75	24.75
C1(=CN(C=CO1)C=CC(=C)C)C	-32.3486	231.518		C(CCN1CCOC(C1)C)(C)C	171.284	4	8	4.67061	-31.4164	185.438	7.17943	24.67	24.67
C(=C)(C=Cn1ccc(c1)C)C	-62.0833	220.144		C(CCN1CCC(C1)C)(C)C	155.285	4	8	5.15182	-12.4689	181.999	7.30413	22.19	22.19
C(=C)(C=CN1C=CC(=C)C1)C	-24.3387	205.311		C(CCN1CCC(C1)C)(C)C	155.285	4	8	5.15182	-12.4689	181.999	7.30413	23.49	23.49
C1(=C)OC=CN(C=CC(=C)C)C1	-32.8369	222.25		C(CCN1CCOC(C1)C)(C)C	171.284	4	8	4.67061	-31.4164	185.438	7.17943	26.92	26.92
C(=C)(C=CN=C(C=C)C)C	-51.9441	175.128		C(CCNC(CC)C)(C)C	143.274	4	8	5.58371	-36.0378	155.833	7.1792	25.9	25.9
C(=C)(C(=NOC)OC=CC(=C)C)C	-20.7312	209.38		C(CCOC(C(C)C)NOC)(C)C	189.299	4	8	4.22612	-11.0588	214.341	6.89786	24.69	24.69
C(=C)(C=COC=C)OC=C	-15.0401	172.446		C(CCOCC)(OCC)C	146.23	4	8	5.47083	-78.5365	153.642	6.1108	33.31	33.31
C(=CC(=C)C(=C)C)(C=N)C	-14.0119	199.943		C(CN)(CC(C(C)C)C)C	143.274	4	8	5.58371	-15.3889	174.121	7.44031	24.83	24.83
C(=C)(C(=C)CC(=C)C=N)C	-12.4774	195.145		C(CN)(CC(C(C)C)C)C	143.274	4	8	5.58371	-15.3889	174.121	7.44031	27.45	27.45
C(=C)(C=C)C=C(C=N)C	-14.8089	178.704		C(CN)(CC(CC)C)C	129.247	4	8	6.1897	-27.8688	159.387	7.58941	25.01	25.01
C(=C)(C=N)CC(=C)C=C	-14.779	178.598		C(CN)(CC(CC)C)C	129.247	4	8	6.1897	-27.8688	159.387	7.58941	27.52	27.52
C(=COC=C)(C=N)COC=C	-29.9079	213.303		C(CN)(COCC)COCC	161.245	4	8	4.96139	-19.717	196.644	7.76424	30.34	30.34
C(=CN=C)(C=C(C=C)C)C	-51.9001	175.332		C(CNC)(CC(CC)C)C	143.274	4	8	5.58371	-64.4935	161.266	7.62006	24.42	24.42
C(=C)(C=C)CC(=CN=C)C	-51.8724	176.52		C(CNC)(CC(CC)C)C	143.274	4	8	5.58371	-64.4935	161.266	7.62006	26.65	26.65
C(=C)(C=C)C=C(C=NC)C	-51.9001	176.773		C(CNC)(CC(CC)C)C	143.274	4	8	5.58371	-64.4935	161.266	7.62006	25.43	25.43
C(=C)(C=C(C=C)C)C=NC	-51.9001	176.773		C(CNC)(CC(CC)C)C	143.274	4	8	5.58371	-64.4935	161.266	7.62006	25.23	25.23
C(=C)(C=C(C=C)C)CN=C	-51.8724	176.503		C(CNC)(CC(CC)C)C	143.274	4	8	5.58371	-64.4935	161.266	7.62006	26.3	26.3
C(=C)(C=C)C=C(CN=C)C	-51.8724	176.503		C(CNC)(CC(CC)C)C	143.274	4	8	5.58371	-64.4935	161.266	7.62006	26.78	26.78
C(=C)(C=NC)CC(=C)C=C	-51.8724	176.503		C(CNC)(CC(CC)C)C	143.274	4	8	5.58371	-64.4935	161.266	7.62006	27.94	27.94
C(=C)(CN=C)CC(=C)C=C	-39.0145	178.66		C(CNC)(CC(CC)C)C	143.274	4	8	5.58371	-64.4935	161.266	7.62006	28.95	28.95
C(=CN=Cc1occc1)(C)C	-49.1367	225.178		C(CNCC1OCCC1)(C)C	157.257	4	8	5.08721	-44.9123	191.215	7.26871	20.22	20.22
C(=C)(C=NCc1occc1)C	-27.5509	227.46		C(CNCC1OCCC1)(C)C	157.257	4	8	5.08721	-44.9123	191.215	7.26871	21.6	21.6
C(=C)(CN=Cc1occc1)C	-27.5509	226.643		C(CNCC1OCCC1)(C)C	157.257	4	8	5.08721	-44.9123	191.215	7.26871	22.19	22.19
C(=C)(C(=C)CC(=C)C=O)C	-10.2761	183.612		C(CO)(CC(C(C)C)C)C	144.258	4	8	5.54562	-55.3249	181.265	7.40642	26.06	26.06
C(=CN(C=C)C=C)(C=O)C	-36.5631	202.749		C(CO)(CN(CC)CC)C	145.246	4	8	5.5079	-19.4791	190.938	7.03536	21.17	21.17
C(=C)(C=O)CN(C=C)C=C	-43.7652	192.941		C(CO)(CN(CC)CC)C	145.246	4	8	5.5079	-19.4791	190.938	7.03536	23.88	23.88
C(=COC(=O)C(=C)C=C)(C)C	-47.276	186.932		C(COC(C(CC)C)O)(C)C	160.257	4	8	4.99198	-12.1452	175.796	7.43218	21.18	21.18
C(=C)(COC(=O)C(=C)C=C)C	-50.1435	182.74		C(COC(C(CC)C)O)(C)C	160.257	4	8	4.99198	-12.1452	175.796	7.43218	20.37	20.37
C(=C)(N(C(=C)C=C)C)C=O	-38.0136	197.462		C(N(C(CC)C)C)(CO)C	145.246	4	8	5.5079	-19.4262	188.316	7.63027	23.9	23.9
C(=C)(C=C)N(C(=C)C=C)C	-44.6313	177.781		C(N(C(CC)C)C)(CC)C	143.274	4	8	5.58371	-51.2182	154.628	7.22077	26.71	26.71
C(=C)(N(C(=C)C=C)C=C)C	-44.6791	177.737		C(N(C(CC)C)CC)(C)C	143.274	4	8	5.58371	-51.763	154.585	6.80132	26.22	26.22
C(=C)(C=C)n1cc(c(c1)C)C	-61.8658	236.426		C(N1CC(C(C1)C)C)(CC)C	155.285	4	8	5.15182	-21.2269	174.848	7.77027	21.94	21.94
C1(=C)C(=CN(C(=C)C=C)C1)C	-24.5899	203.272		C(N1CC(C(C1)C)C)(CC)C	155.285	4	8	5.15182	-21.2269	174.848	7.77027	25.03	25.03
C(=C)(C=C)n1cccc1	-60.2422	191.389		C(N1CCCC1)(CC)C	127.231	4	8	6.28778	-43.7038	153.596	7.07833	22.47	22.47
C(=C)(C=C)N1C=COC=C1	-18.2355	212.095		C(N1CCOCC1)(CC)C	143.23	4	8	5.58542	-49.467	184.837	6.8956	26.74	26.74
C(=C)(N=C(C(=C)C)C(=C)C)C	-32.051	185.652		C(NC(C(C)C)C(C)C)(C)C	157.301	4	8	5.08579	-13.8658	178.638	7.77878	24.97	24.97
C(=NC(=C)C(=C)C=C)(C)C	-51.918	176.332		C(NC(C(CC)C)C)(C)C	143.274	4	8	5.58371	-14.5926	154.105	7.50727	26.25	26.25
C(=C)(NC(=C)C(=C)C=C)C	-31.0304	202.712		C(NC(C(CC)C)C)(C)C	143.274	4	8	5.58371	-14.5926	154.105	7.50727	27.22	27.22
C(=C)(N=C(C(=C)C=C)C)C	-51.918	176.332		C(NC(C(CC)C)C)(C)C	143.274	4	8	5.58371	-14.5926	154.105	7.50727	25.86	25.86
C(=NC(=C(C=C)C=C)C)(C)C	-38.9462	186.181		C(NC(C(CC)CC)C)(C)C	157.301	4	8	5.08579	-10.4659	180.915	6.73501	24.86	24.86
C(=CC(=C(C)C)C=C)(N=C)C	-38.9223	186.32		C(NC)(CC(C(C)C)CC)C	157.301	4	8	5.08579	-39.2889	195.819	7.60302	23.82	23.82
C(=NC)(C=C(C(=C)C)C=C)C	-38.9223	186.342		C(NC)(CC(C(C)C)CC)C	157.301	4	8	5.08579	-39.2889	195.819	7.60302	24.26	24.26
C(=C)(N=C)CC(=C(C)C)C=C	-32.2558	185.915		C(NC)(CC(C(C)C)CC)C	157.301	4	8	5.08579	-39.2889	195.819	7.60302	25.43	25.43
C(=NC)(C=C(C(=C)C=C)C)C	-38.9216	186.347		C(NC)(CC(C(CC)C)C)C	157.301	4	8	5.08579	-39.4546	195.847	7.79121	24.98	24.98
C(=C)(C(=C)C=C)CC(=NC)C	-32.2617	185.941		C(NC)(CC(C(CC)C)C)C	157.301	4	8	5.08579	-39.4546	195.847	7.79121	28.13	28.13
C(=CC(=C(C=C)C)C)(N=C)C	-38.9216	186.325		C(NC)(CC(C(CC)C)C)C	157.301	4	8	5.08579	-39.4546	195.847	7.79121	23.95	23.95
C(=C)(N=C)CC(=C(C=C)C)C	-32.2617	185.919		C(NC)(CC(C(CC)C)C)C	157.301	4	8	5.08579	-39.4546	195.847	7.79121	24.75	24.75
C(=NC)(C=CC(=C)C(=C)C)C	-38.9219	186.345		C(NC)(CCC(C(C)C)C)C	157.301	4	8	5.08579	-52.3406	195.834	7.55148	25.27	25.27
C(=C)(N=C)C=CC(=C(C)C)C	-38.9219	186.323		C(NC)(CCC(C(C)C)C)C	157.301	4	8	5.08579	-52.3406	195.834	7.55148	23.62	23.62
C(=C)(N=CC(=C(C)C)C=C)C	-38.9496	186.162		C(NCC(C(C)C)CC)(C)C	157.301	4	8	5.08579	-14.4453	180.965	7.07051	24.14	24.14
C(=NC=C(C(=C)C)C=C)(C)C	-38.9496	186.162		C(NCC(C(C)C)CC)(C)C	157.301	4	8	5.08579	-14.4453	180.965	7.07051	26.16	26.16
C(=C)(N=CC(=C)C=C)C	-61.4667	173.708		C(NCC(CC)C)(C)C	129.247	4	8	6.1897	-56.485	140.09	7.21665	26.21	26.21
C(=NC=C)(CC(=C)C(=C)C)C	-19.0363	185.797		C(NCC)(CC(C(C)C)C)C	157.301	4	8	5.08579	-21.7407	186.816	7.55148	26.92	26.92
C(=NC=C)(C=C(C(=C)C)C)C	-38.942	186.205		C(NCC)(CC(C(C)C)C)C	157.301	4	8	5.08579	-21.7407	186.816	7.55148	23.93	23.93
C(=NC=C)(C=C(C=C)C)C	-51.9265	175.207		C(NCC)(CC(CC)C)C	143.274	4	8	5.58371	-40.6686	155.778	7.66826	24.2	24.2
C(=NC=C)(CC(=C)C=C)C	-51.8955	176.383		C(NCC)(CC(CC)C)C	143.274	4	8	5.58371	-40.6686	155.778	7.66826	27.07	27.07
C(=C)(NOC(=C)C(=C)C=C)C	-23.9377	201.962		C(NOC(C(CC)C)C)(C)C	159.273	4	8	5.02282	-71.2895	157.075	7.58896	28.63	28.63
C(=C)(OC(=C)OC(=C)C=C)C	-70.0315	182.4		C(OC(OC(CC)C)C)(C)C	160.257	4	8	4.99198	-71.9195	165.771	6.99125	34.13	34.13
C(=C)(C=C(C(=C)C=C)OC)OC	-66.0904	198.859		C(OC)(CC(C(CC)C)OC)C	174.284	4	8	4.59021	-54.3793	175.333	7.52674	29.03	29.03
C(=C)(C=C(C=C)O)OC=C	-12.546	214.956		C(OCC)(CC(CC)O)C	146.23	4	8	5.47083	-36.7908	190.678	7.49419	31.03	31.03
C(=C)c1c(cccc1C)C	-49.7273	182.153		C1(C(C(CCC1)C)CC)C	140.27	4	8	5.70329	-54.5473	168.101	7.4424	19.12	19.12
C(=C)c1c(cncc1C)C	-16.548	189.769		C1(C(C(CNC1)C)CC)C	141.258	4	8	5.6634	-18.4762	161.577	7.58633	17.79	17.79
C(=C)c1c(C=C)coc1	-85.6973	171.569		C1(C(CC)COC1)CC	128.215	4	8	6.23952	-13.9007	128.181	7.21326	24.64	24.64
C(=C)C(=NC)c1cc(oc1)C	-28.1565	227.326		C1(C(NC)CC)CC(OC1)C	157.257	4	8	5.08721	-44.7043	190.478	7.97061	20.18	20.18
C(=C)C(=NC)c1c(occ1)C	-28.172	228.645		C1(C(OCC1)C)C(NC)CC	157.257	4	8	5.08721	-46.7021	190.478	7.97061	20.07	20.07
C(=C)(C1=CC(=CC1=N)C)C	-12.367	201.87		C1(CC(C(C)C)C(C1)N)C	141.258	4	8	5.6634	-17.5641	172.713	7.93958	20.79	20.79
C(=C)(C1=CC(=C)C=C1N)C	-41.5764	208.796		C1(CC(C(C)C)C(C1)N)C	141.258	4	8	5.6634	-17.5641	172.713	7.93958	22.63	22.63
C1(=C)C=C(C(=C)C)C(=N)C1	-12.2718	200.146		C1(CC(C(C)C)C(C1)N)C	141.258	4	8	5.6634	-17.5641	172.713	7.93958	22.45	22.45
c1(C=C)ccccc1	-17.7154	149.775		C1(CC)CCCCC1	112.216	4	8	7.12911	-85.5	130.443	7.89289	20.1	20.1
C(=C)c1cccnc1	-49.1171	162.957		C1(CC)CCCNC1	113.204	4	8	7.06689	-24.9228	146.063	7.42399	18.66	18.66
C(=C)c1ccnc(c1)C	-50.4556	180.476		C1(CC)CCNC(C1)C	127.231	4	8	6.28778	-18.427	164.76	7.82415	17.97	17.97
c1(C=C)ccncc1	-49.1153	162.979		C1(CC)CCNCC1	113.204	4	8	7.06689	-24.8103	146.192	5.42345	18.4	18.4
c1(cccc(C=C)c1)C	-51.3533	167.261		C1(CCCC(CC)C1)C	126.243	4	8	6.33699	-87.01	151.909	7.59263	19.7	19.7
c1(ccccc1)OC=C	-10.5171	167.531		C1(CCCCC1)OCC	128.215	4	8	6.23952	-48.2074	128.579	7.8828	20.55	20.55
C(=Cn1ccc(c1)C)(C=C)C	-62.0814	220.142		C1(CCN(CC(CC)C)C1)C	155.285	4	8	5.15182	-12.4672	181.99	7.73813	22.08	22.08
C(=C)(C=C)Cn1ccc(c1)C	-61.9023	226.342		C1(CCN(CC(CC)C)C1)C	155.285	4	8	5.15182	-12.4672	181.99	7.73813	21.28	21.28
C1(=C)C=CN(C=C(C=C)C)C1	-24.3478	205.307		C1(CCN(CC(CC)C)C1)C	155.285	4	8	5.15182	-12.4672	181.99	7.73813	23.62	23.62
C1(=C)C=CN(CC(=C)C=C)C1	-24.3588	204.172		C1(CCN(CC(CC)C)C1)C	155.285	4	8	5.15182	-12.4672	181.99	7.73813	26.37	26.37
c1(ccn(C=C)c1C=C)C	-61.8243	219.709		C1(CCN(CC)C1CC)C	141.258	4	8	5.6634	-28.0091	159.255	7.75666	23.2	23.2
C1(=C)C=COC(=C1)C=C	-21.9541	166.096		C1(CCOC(CC)C1)C	128.215	4	8	6.23952	-47.5565	128.191	7.65536	29.55	29.55
C(=Cc1ccoc1)(C(=NC)C)C	-67.3893	248.091		C1(CCOC1)CC(C(NC)C)C	171.284	4	8	4.67061	-41.3594	202.982	7.93814	21.67	21.67
c1(ccoc1)CC(=C(N=C)C)C	-45.4608	248.16		C1(CCOC1)CC(C(NC)C)C	171.284	4	8	4.67061	-41.3594	202.982	7.93814	20.46	20.46
C(=C)(C(=NC)C)Cc1ccoc1	-45.4608	248.174		C1(CCOC1)CC(C(NC)C)C	171.284	4	8	4.67061	-41.3594	202.982	7.93814	21.14	21.14
C(=C)C(=NC)Cc1ccoc1	-28.3693	227.242		C1(CCOC1)CC(NC)CC	157.257	4	8	5.08721	-43.8272	198.827	7.74456	21.54	21.54
C1(=CC(=NC)C=C)C=COC1	-27.5327	199.593		C1(CCOC1)CC(NC)CC	157.257	4	8	5.08721	-43.8272	198.827	7.74456	25.57	25.57
C(=C)C(=NCc1ccoc1)C	-27.6454	228.747		C1(CCOC1)CNC(CC)C	157.257	4	8	5.08721	-17.2374	199.012	7.7127	21.57	21.57
C(=C)C(=NC)c1c(cco1)C	-28.0742	228.645		C1(CCOC1C(NC)CC)C	157.257	4	8	5.08721	-47.6502	183.176	7.97061	21.07	21.07
C1(=CN(C(=C)C=C)C=C(O1)C)C	-33.0165	222.126		C1(CN(C(CC)C)CC(O1)C)C	171.284	4	8	4.67061	-30.4662	184.591	7.71268	26.28	26.28
C1(=C)CN(C(=C)C=C)C=C(O1)C	-33.6836	212.78		C1(CN(C(CC)C)CC(O1)C)C	171.284	4	8	4.67061	-30.4662	184.591	7.71268	28.22	28.22
C1(=C)CN(C(=C)C=C)CC(=C)O1	-34.4054	213.781		C1(CN(C(CC)C)CC(O1)C)C	171.284	4	8	4.67061	-30.4662	184.591	7.71268	30.52	30.52
C(=Cc1occ(c1)C)(C=C)C	-84.687	198.67		C1(COC(CC(CC)C)C1)C	156.269	4	8	5.11938	-19.3045	194.002	7.90936	23.58	23.58
C(=C)(C=C)Cc1occ(c1)C	-87.9776	198.645		C1(COC(CC(CC)C)C1)C	156.269	4	8	5.11938	-19.3045	194.002	7.90936	23.11	23.11
C(=C)(C=C)Cc1cc(no1)C	-41.6138	199.113		C1(NOC(C1)CC(CC)C)C	157.257	4	8	5.08721	-18.9659	174.232	7.961	22.88	22.88
C(=Cc1cc(no1)C)(C=C)C	-69.9469	206.235		C1(NOC(C1)CC(CC)C)C	157.257	4	8	5.08721	-18.9659	174.232	7.961	23.46	23.46
c1(c(C=C)oc(c1)OC=C)C	-32.4621	207.502		C1(OCC)OC(C(C1)C)CC	158.241	4	8	5.05558	-70.9625	179.227	7.84765	27.68	27.68
N(=C)C(=C(Cc1occc1)C)C	-45.4138	248.16		C1(OCCC1)CC(C(NC)C)C	171.284	4	8	4.67061	-41.4858	202.982	7.93814	20.31	20.31
C(=Cc1occc1)(C(=NC)C)C	-67.3916	248.091		C1(OCCC1)CC(C(NC)C)C	171.284	4	8	4.67061	-41.4858	202.982	7.93814	21.53	21.53
C(=C)(C(=NC)C)Cc1occc1	-45.4138	248.174		C1(OCCC1)CC(C(NC)C)C	171.284	4	8	4.67061	-41.4858	202.982	7.93814	20.99	20.99
C(=C)(C(=O)C(=C)N(C)C)C=C	-35.5516	197.588		N(C(C(C(CC)C)O)C)(C)C	159.273	4	8	5.02282	-53.2808	207.721	7.87561	24.03	24.03
C(=O)(C(=C(N(C)C)C)C=C)OC=C	-42.2596	212.393		N(C(C(C(OCC)O)CC)C)(C)C	189.299	4	8	4.22612	-23.1905	226.262	7.82918	17.78	17.78
C(=C)(C(=C)C=C)N(C=C)C	-44.6064	177.823		N(C(C(CC)C)C)(CC)C	143.274	4	8	5.58371	-50.8868	154.63	7.6314	27.01	27.01
C(=O)(C(=C(C=C)C=C)N(C)C)OC	-42.2774	212.421		N(C(C(OC)O)C(CC)CC)(C)C	189.299	4	8	4.22612	-11.2231	226.01	7.51983	16.02	16.02
C(=C)(N(C)C)C=C(C(=N)C)C=C	-22.1102	257.43		N(C(CC(C(N)C)CC)C)(C)C	172.316	4	8	4.64263	-24.8534	197.011	7.78315	22.93	22.93
C(=C)(C=C)C=CC(=C)N(C)C	-45.7324	193.025		N(C(CCC(CC)C)C)(C)C	157.301	4	8	5.08579	-46.7537	173.205	7.5137	26.01	26.01
C(=C)(C(=O)C=C(N(C)C)OC=C)C	-20.9308	235.007		N(C(OCC)CC(C(C)C)O)(C)C	189.299	4	8	4.22612	-12.7229	226.121	7.56119	23.96	23.96
C(=C)(C(=CN(C)C)C=O)C=C	-38.3961	204.674		N(CC(C(CC)C)CO)(C)C	159.273	4	8	5.02282	-17.5478	209.05	7.65757	22.36	22.36
C(=CN(C)C)(C(=O)C=C)C=C	-34.1072	204.674		N(CC(C(CC)O)CC)(C)C	159.273	4	8	5.02282	-51.2902	209.189	7.61518	21.73	21.73
C(=C(C=C)N(C=C)C)(C=C)C	-45.8481	193.739		N(CC)(C(C(CC)C)CC)C	157.301	4	8	5.08579	-47.5292	172.86	7.56718	24.23	24.23
C(=O)(C(=CN(C=C)C)C=C)C	-34.0812	204.655		N(CC)(CC(C(O)C)CC)C	159.273	4	8	5.02282	-15.6111	209.117	7.6966	20.42	20.42
C(=C)(C=CN(C=C)C)C(=O)C	-34.081	204.654		N(CC)(CCC(C(O)C)C)C	159.273	4	8	5.02282	-14.6653	209.082	7.6966	20.95	20.95
C(=C)(C=C)C=CN(C=C)C	-44.688	185.423		N(CC)(CCC(CC)C)C	143.274	4	8	5.58371	-54.9019	156.251	7.11837	25.27	25.27
C(=C)(C(=O)C(=C)C=CN(C)C)C	-33.9103	210.736		N(CCC(C(C(C)C)O)C)(C)C	173.3	4	8	4.61627	-76.2751	213.227	7.56072	21.71	21.71
C(=C)(C(=O)C=CN(C)C)C=C	-34.1105	204.672		N(CCC(C(CC)C)O)(C)C	159.273	4	8	5.02282	-51.2867	209.191	7.65757	22.52	22.52
n1(c(c(C=C)cc1)C)C=C	-61.8146	219.691		N1(C(C(CC)CC1)C)CC	141.258	4	8	5.6634	-28.0117	159.226	7.75666	23.19	23.19
n1(C=C)c(C=C)ccc1	-60.241	191.379		N1(C(CC)CCC1)CC	127.231	4	8	6.28778	-43.7072	153.611	7.30555	23.43	23.43
C(=C)N1C=CC(=C(C=C)C)C1	-24.4376	205.265		N1(CC)CCC(C(CC)C)C1	155.285	4	8	5.15182	-12.4502	181.875	7.70221	23.65	23.65
C(=C1C=CN(C=C1)C)(C=C)C	-38.3609	205.603		N1(CCC(C(CC)C)CC1)C	155.285	4	8	5.15182	-45.2715	181.441	7.18449	20.51	20.51
C1(=C)C(=CN(C=C1)C)C=C	-38.0125	198.455		N1(CCC(C(CC)C1)C)C	141.258	4	8	5.6634	-45.3396	159.077	7.72213	22.31	22.31
C(=C)(C=Cc1ccn(c1)C)C	-62.0168	219.812		N1(CCC(CCC(C)C)C1)C	155.285	4	8	5.15182	-12.4082	181.353	7.30413	22.08	22.08
C(=COC=C)(C(=O)N(C=C)C)C	-30.2544	236.617		C(C(N(CC)C)O)(COCC)C	175.272	4	8	4.56433	-12.1963	219.701	7.60023	20.45	20.45
C(=C)(C(=O)N(C=C)C)COC=C	-30.7282	235.951		C(C(N(CC)C)O)(COCC)C	175.272	4	8	4.56433	-12.1963	219.701	7.60023	20.53	20.53
C(=C)(C(=C)N1C=COC=C1)C	-32.5484	226.599		C(C(N1CCOCC1)C)(C)C	157.257	4	8	5.08721	-45.5654	192.394	6.79859	26.8	26.8
C(=NC(=C(C)C)C)(C=C)C=C	-38.9558	186.128		C(C(NC(CC)CC)C)(C)C	157.301	4	8	5.08579	-13.6873	181.067	6.86621	24.79	24.79
C(=C)(C(C=C)(C=C)C)N=C	-38.2774	172.97		C(C(NC)C)(CC)(CC)C	143.274	4	8	5.58371	-52.6166	145.595	7.02871	28.76	28.76
C(=C(N=C)C=C)(C=C)C	-61.4283	176.318		C(C(NC)CC)(CC)C	129.247	4	8	6.1897	-57.6709	142.527	7.64431	25.6	25.6
C(=C)(C=C)C(=NC)C=C	-61.4283	176.303		C(C(NC)CC)(CC)C	129.247	4	8	6.1897	-57.6709	142.527	7.64431	27.17	27.17
C(=C)(C(=C)OC(=C)C=C)O	-11.0252	215.699		C(C(OC(CC)C)C)(O)C	146.23	4	8	5.47083	-33.1066	178.845	7.59846	32.34	32.34
C(=NC(=C(OC)OC)C)(C=C)C=C	-45.144	210.344		C(C(OC)OC)(NC(CC)CC)C	189.299	4	8	4.22612	-56.872	228.466	6.54452	26.49	26.49
C(=C)(C(OC)OC)N=C(C=C)C=C	-45.1125	218.413		C(C(OC)OC)(NC(CC)CC)C	189.299	4	8	4.22612	-56.872	228.466	6.54452	25.39	25.39
C(=C)(C(C=C)(C=C)O)OC=C	-10.5189	218.095		C(C(OCC)C)(CC)(CC)O	160.257	4	8	4.99198	-31.5147	205.235	6.76767	33	33
C(=C)(C1=CC(=N)C(=C1C)C)C	-11.9425	206.853		C(C1C(C(C(C1)N)C)C)(C)C	155.285	4	8	5.15182	-14.1875	178.612	8.02963	19.87	19.87
C(=C)(C1=CC(=C(C1=C)C)N)C	-42.0749	219.698		C(C1C(C(C(C1)N)C)C)(C)C	155.285	4	8	5.15182	-14.1875	178.612	8.02963	23.45	23.45
C(=C)(C1=C(C(=C)C(=C1)N)C)C	-41.9368	219.698		C(C1C(C(C(C1)N)C)C)(C)C	155.285	4	8	5.15182	-14.1875	178.612	8.02963	20.69	20.69
C(=C1C(=C)C(=C)C(=C1)N)(C)C	-41.8633	219.698		C(C1C(C(C(C1)N)C)C)(C)C	155.285	4	8	5.15182	-14.1875	178.612	8.02963	22.47	22.47
C1(=C)C(=C(C)C)OC(=C1)OC=C	-33.6727	228.592		C(C1C(CC(O1)OCC)C)(C)C	172.268	4	8	4.64393	-71.1917	186.065	7.81769	25.26	25.26
C(=C)(c1c(cc(OC=C)o1)C)C	-32.0644	223.553		C(C1C(CC(O1)OCC)C)(C)C	172.268	4	8	4.64393	-71.1917	186.065	7.81769	27.55	27.55
C(=C)(c1c(C=C)cco1)C	-84.8903	183.856		C(C1C(CC)CCO1)(C)C	142.242	4	8	5.62422	-18.7712	174.382	7.59287	24.41	24.41
C(=C)(C1C(=C)C=C(O1)OC=C)C	-13.769	220.242		C(C1C(CC(O1)OCC)C)(C)C	172.268	4	8	4.64393	-71.1917	186.065	7.81769	33.16	33.16
C(=C)(C1=C(C=C)C=COC1)C	-16.6527	212.419		C(C1C(CC)CCOC1)(C)C	156.269	4	8	5.11938	-37.3201	193.989	7.53937	26.22	26.22
C(=C)(c1c(C=C)coc1)C	-84.8909	183.834		C(C1C(CC)COC1)(C)C	142.242	4	8	5.62422	-18.7933	174.382	7.43578	24.34	24.34
C(=C)(C1=C(C=C)COC=C1)C	-16.6521	212.419		C(C1C(CC)COCC1)(C)C	156.269	4	8	5.11938	-37.3208	193.989	7.53937	26.73	26.73
N(=C(c1c(C=C)occ1)C)C	-28.2262	227.242		C(C1C(CC)OCC1)(NC)C	157.257	4	8	5.08721	-44.2934	190.484	7.94615	21.21	21.21
C(=C1C(=C)C=CC1=N)(C)C	-12.3672	201.87		C(C1C(CCC1N)C)(C)C	141.258	4	8	5.6634	-17.5632	172.704	7.93958	21.46	21.46
C(=C)(C1=C(C=CC1=N)C)C	-12.3672	201.87		C(C1C(CCC1N)C)(C)C	141.258	4	8	5.6634	-17.5632	172.704	7.93958	21.13	21.13
C(=C)(C1=C(C=CC1=C)N)C	-41.5764	208.797		C(C1C(CCC1N)C)(C)C	141.258	4	8	5.6634	-17.5632	172.704	7.93958	24.27	24.27
C(=C)(C1C(=C)C=CC1=N)C	-12.2617	199.981		C(C1C(CCC1N)C)(C)C	141.258	4	8	5.6634	-17.5632	172.704	7.93958	25.03	25.03
C(=C)(C1=COC=CC1=C)C	-21.2026	183.576		C(C1C(CCOC1)C)(C)C	142.242	4	8	5.62422	-38.3499	174.382	7.54821	30.98	30.98
C(=C)(C1=C(OCC1=C)OC=C)C	-33.3652	222.787		C(C1C(COC1OCC)C)(C)C	172.268	4	8	4.64393	-71.1918	186.056	7.78701	32.53	32.53
C(=C)(c1c(coc1OC=C)C)C	-32.047	223.527		C(C1C(COC1OCC)C)(C)C	172.268	4	8	4.64393	-71.1918	186.056	7.78701	27.03	27.03
C(=C)(C1=C(C=C)N(C=CO1)C)C	-32.9943	221.926		C(C1C(N(CCO1)C)CC)(C)C	171.284	4	8	4.67061	-30.3911	184.483	7.6202	24.97	24.97
C(=C)(c1c(OC)cccc1)C	-10.2659	220.768		C(C1C(OC)CCCC1)(C)C	156.269	4	8	5.11938	-40.2209	194.005	7.54722	19.07	19.07
C(=C)(C1=CC(=N)C(=C1)C)C	-12.4351	201.873		C(C1CC(C(C1)C)N)(C)C	141.258	4	8	5.6634	-19.7546	172.827	7.93958	20.87	20.87
C(=C)(C1=CC(=N)C(=C)C1)C	-12.4981	200.144		C(C1CC(C(C1)C)N)(C)C	141.258	4	8	5.6634	-19.7546	172.827	7.93958	23.53	23.53
C(=C)(C1=CC(=C)C(=C1)N)C	-28.7876	208.793		C(C1CC(C(C1)C)N)(C)C	141.258	4	8	5.6634	-19.7546	172.827	7.93958	21.92	21.92
C(=C)(C1=CC(=C)C(=N)C1)C	-12.4077	200.144		C(C1CC(C(C1)C)N)(C)C	141.258	4	8	5.6634	-19.7546	172.827	7.93958	22.8	22.8
C(=C)(c1ccc(C(=C)C)o1)C	-87.9424	197.461		C(C1CCC(C(C)C)O1)(C)C	156.269	4	8	5.11938	-21.7422	174.59	7.02741	23.91	23.91
C(=C)(c1ccc(C=C)o1)C	-84.8897	183.856		C(C1CCC(CC)O1)(C)C	142.242	4	8	5.62422	-18.7467	174.382	7.43578	24.35	24.35
C(=C)(c1ccc(C=NC)o1)C	-28.0418	227.383		C(C1CCC(O1)CNC)(C)C	157.257	4	8	5.08721	-47.9705	183.191	7.60224	22.41	22.41
c1(OC)cccc(C(=C)C)c1	-10.2612	220.768		C(C1CCCC(OC)C1)(C)C	156.269	4	8	5.11938	-40.2219	194.005	7.59449	19.04	19.04
C(=C)(c1cccnc1)C	-50.4781	179.784		C(C1CCCNC1)(C)C	127.231	4	8	6.28778	-18.3811	164.78	7.31179	18.24	18.24
C(=C)(C=C)c1ccoc1	-85.6982	171.57		C(C1CCOC1)(CC)C	128.215	4	8	6.23952	-13.9022	128.181	7.60814	23.87	23.87
C(=C)(c1cc(OC=C)oc1)C	-32.4492	209.23		C(C1COC(OCC)C1)(C)C	158.241	4	8	5.05558	-70.9623	179.2	7.54491	27.27	27.27
C(=C(C(=O)OC)C=C)(C=C)C	-47.0957	188.655		C(C(C(OC)O)CC)(CC)C	160.257	4	8	4.99198	-24.0485	176.932	7.69856	18.16	18.16
C(=C)(C(=O)c1n(c(cc1)C)C)C	-11.8717	261.845		C(C(C1N(C(CC1)C)C)O)(C)C	171.284	4	8	4.67061	-12.2962	225.303	7.89429	16.31	16.31
C(=C)(C(=NC=C)C)C=C	-61.4556	173.732		C(C(CC)C)(NCC)C	129.247	4	8	6.1897	-56.3877	140.883	7.69375	26.26	26.26
C(=C(C=C)C=C)(CN=C)C	-51.8727	176.501		C(C(CC)CC)(CNC)C	143.274	4	8	5.58371	-64.2222	161.267	7.09507	26.28	26.28
C(=C(C=C)C=C)(C=NC)C	-51.9005	176.771		C(C(CC)CC)(CNC)C	143.274	4	8	5.58371	-64.2222	161.267	7.09507	24.72	24.72
C(=C)(N(C=C(C(=O)C)C=C)C)C	-33.8744	210.766		C(C(CC)CN(C(C)C)C)(O)C	173.3	4	8	4.61627	-17.5434	213.678	7.68443	19.96	19.96
C(=C)(C(=CN=C)C=C)C	-61.4259	176.326		C(C(CC)CNC)(C)C	129.247	4	8	6.1897	-67.349	142.657	7.21665	26.94	26.94
C(=C)(C(=NC=C)C=C)C	-61.4654	173.711		C(C(CC)NCC)(C)C	129.247	4	8	6.1897	-53.6957	140.187	7.21665	25.72	25.72
C(=C)(C=C(C=C)OCOC)C	-80.1983	190.201		C(CC(CC)OCOC)(C)C	160.257	3	6	3.74399	-75.9232	168.432	6.68004	28.78	28.78
C(=C)(n1cccc1)C	-72.2025	160.143		C(N1CCCC1)(C)C	113.204	3	6	5.30017	-43.5949	129.963	7.91715	20.2	20.2
C(N1C=COC(=C1)C=C)(C)(C)C	-35.8631	211.127		C(N1CCOC(CC)C1)(C)(C)C	171.284	3	6	3.50295	-30.3253	184.727	6.98312	27.52	27.52
C(=C)(N1C=COC=C1)C	-19.8154	224.039		C(N1CCOCC1)(C)C	129.203	3	6	4.64386	-48.4733	157.92	7.84706	25.97	25.97
C(N1C(=COC=C1)C=C)(C)(C)C	-35.8629	211.127		C(N1C(CC)COCC1)(C)(C)C	171.284	3	6	3.50295	-30.3258	184.732	6.98312	29.15	29.15
C(C=C)(n1c(ccc1)C)(C)C	-52.026	196.68		C(N1C(CCC1)C)(CC)(C)C	155.285	3	6	3.86386	-21.2218	175.238	7.24578	19.5	19.5
C(=C)(n1c(ccc1C)C)C	-61.8147	188.739		C(N1C(CCC1C)C)(C)C	141.258	3	6	4.24755	-28.1557	158.839	7.41406	19.92	19.92
C(=C)(N1C(=COC=C1C)C)C	-35.0123	205.452		C(N1C(COCC1C)C)(C)C	157.257	3	6	3.81541	-44.7079	191.81	7.33131	26.4	26.4
C(=C)(N1C(=C)COC=C1C)C	-35.8917	205.079		C(N1C(COCC1C)C)(C)C	157.257	3	6	3.81541	-44.7079	191.81	7.33131	26.4	26.4
C(=C)(N1C(=C)COCC1=C)C	-36.731	195.927		C(N1C(COCC1C)C)(C)C	157.257	3	6	3.81541	-44.7079	191.81	7.33131	26.3	26.3
C(=C)(C=C)C=C(OCOC)C	-80.1984	190.201		C(OCOC)(CC(CC)C)C	160.257	3	6	3.74399	-75.9931	168.432	7.38967	29.66	29.66
C(=CC(=C)OCOC)(C=C)C	-80.1984	190.201		C(OCOC)(CC(CC)C)C	160.257	3	6	3.74399	-75.9931	168.432	7.38967	28.59	28.59
C(=C)OC=COC=C	-73.2884	117.102		C(OCCOCC)C	118.176	3	6	5.07717	-79.3242	117.433	7.50408	34.44	34.44
C(=C)(OCOC)CC(=C)C=C	-87.7432	181.135		C(OCOC)(CC(CC)C)C	160.257	3	6	3.74399	-75.9931	168.432	7.38967	31.21	31.21
C(=C)(n1cc(c(OC)c1)OC)C	-38.1276	246.562		C(N1CC(C(OC)C1)OC)(C)C	173.256	3	6	3.46308	-45.7325	187.709	7.18044	20.37	20.37
C(=C)(ONC(=C)C(=C)C)C	-15.3987	167.589		C(ONC(C(C)C)C)(C)C	145.246	3	6	4.13092	-71.1433	144.692	6.98303	28.52	28.52
C(N1C=CC(=C)C=C1)(C)(C)C	-38.6897	194.247		C(N1CCC(CC1)C)(C)(C)C	155.285	3	6	3.86386	-45.2788	175.47	7.92884	22.52	22.52
C(n1c(C=C)ccc1)(C)(C)C	-52.0301	196.571		C(N1C(CC)CCC1)(C)(C)C	155.285	3	6	3.86386	-21.2236	175.461	7.10874	20.05	20.05
C(=C)(C=CN(C(C=N)(C)C)C)C	-24.141	226.707		C(N(CCC(C)C)C)(CN)(C)C	172.316	3	6	3.48197	-24.292	197.467	1.88216	23.4	23.4
C(N(C=C(C=C)C=N)C)(C)(C)C	-10.2657	226.72		C(N(CC(CC)CN)C)(C)(C)C	172.316	3	6	3.48197	-24.0482	197.407	7.13015	22.12	22.12
C(=C)(N(C=C)C=C)C	-44.503	161.662		C(N(CC)CC)(C)C	115.22	3	6	5.20743	-106.219	106.294	7.80602	24.97	24.97
C(N(C=C)C=CC(=O)C)(C)(C)C	-36.3921	204.801		C(N(CC)CCC(O)C)(C)(C)C	173.3	3	6	3.4622	-17.7302	214.188	7.08541	20.18	20.18
C(N(C=C)C=C)(C=NC)(C)C	-20.3361	182.568		C(N(CC)CC)(CNC)(C)C	158.289	3	6	3.79054	-47.9155	194.536	7.90716	26.31	26.31
C(N(C=C)C=C)(CN=C)(C)C	-19.9003	179.882		C(N(CC)CC)(CNC)(C)C	158.289	3	6	3.79054	-47.9155	194.536	7.90716	26.99	26.99
C(=C)(N(C(=C)C)C(=C)C)C	-45.4006	170.766		C(N(C(C)C)C(C)C)(C)C	143.274	3	6	4.18778	-48.3544	154.776	7.51742	25.38	25.38
C(=C)(N(C(=C)C)C=C)C	-71.7059	174.297		C(N(C(C)C)CC)(C)C	129.247	3	6	4.64227	-73.2704	132.402	7.74857	25.18	25.18
C(N(C(=C)C=C)C)(C=O)(C)C	-36.6349	192.656		C(N(C(CC)C)C)(CO)(C)C	159.273	3	6	3.76712	-16.4633	207.423	7.23691	24.45	24.45
C(C(=O)C=C)(N(C)C)(C=C)C	-45.4306	193.045		C(N(C)C)(C(CC)O)(CC)C	159.273	3	6	3.76712	-53.212	207.871	7.56891	24.84	24.84
C(N(C)C)(C=NC(=C)C=C)(C)C	-18.884	189.662		C(N(C)C)(CNC(CC)C)(C)C	172.316	3	6	3.48197	-54.7878	197.42	7.13015	25.9	25.9
C1(=C(C=C)COC1)C=C	-33.1123	164.491		C1(C(CC)COC1)CC	128.215	3	6	4.67964	-13.9007	128.181	7.21326	25.98	25.98
C(=CONC(=C)C(=C)C)(C)C	-34.4083	179.334		C(CONC(C(C)C)C)(C)C	159.273	3	6	3.76712	-71.2592	157.075	6.86799	28	28
C(=C)(CONC(=C)C(=C)C)C	-44.1501	178.499		C(CONC(C(C)C)C)(C)C	159.273	3	6	3.76712	-71.2592	157.075	6.86799	27.04	27.04
C(=CON=CC(=C)OC)(C)C	-40.0071	189.981		C(CONCC(OC)C)(C)C	161.245	3	6	3.72105	-10.9387	175.381	7.04149	28.67	28.67
C(=C)(CON=CC(=C)OC)C	-18.2377	183.051		C(CONCC(OC)C)(C)C	161.245	3	6	3.72105	-10.9387	175.381	7.04149	27.71	27.71
C(=N)(COCC(=C)C=C)C	-48.2182	181.909		C(COCC(CC)C)(N)C	145.246	3	6	4.13092	-62.66	179.375	7.62792	26.38	26.38
C(=COC=C(C=C)O)(C)C	-22.6367	215.247		C(COCC(CC)O)(C)C	146.23	3	6	4.10313	-23.7446	195.882	6.97612	31.99	31.99
C(=C)(COCC(=O)C=C)C	-31.9203	199.859		C(COCC(CC)O)(C)C	146.23	3	6	4.10313	-23.7446	195.882	6.97612	24.46	24.46
C(=C)(COC=C(C=C)O)C	-22.9368	202.907		C(COCC(CC)O)(C)C	146.23	3	6	4.10313	-23.7446	195.882	6.97612	31.29	31.29
C(=C)c1n(cc(c1)C)C	-60.0609	172.566		C1(CC(N(C1)C)CC)C	127.231	3	6	4.71583	-40.5616	151.337	7.7811	19.67	19.67
C(=COC(=C)C=C(C)C)(O)C	-14.0244	227.309		C(COC(CC(C)C)C)(O)C	160.257	3	6	3.74399	-40.5119	197.951	7.43218	30.8	30.8
C(=COC(=CC(=C)C)C)(O)C	-13.8459	227.301		C(COC(CC(C)C)C)(O)C	160.257	3	6	3.74399	-40.5119	197.951	7.43218	31.51	31.51
C(=C)(CC(=C)OC=C(O)C)C	-14.424	234.656		C(COC(CC(C)C)C)(O)C	160.257	3	6	3.74399	-40.5119	197.951	7.43218	33.01	33.01
C(=C)(CC(=C)OCC(=O)C)C	-47.3863	222.877		C(COC(CC(C)C)C)(O)C	160.257	3	6	3.74399	-40.5119	197.951	7.43218	26.18	26.18
C(=O)(COC(=CC(=C)C)C)C	-46.6389	222.908		C(COC(CC(C)C)C)(O)C	160.257	3	6	3.74399	-40.5119	197.951	7.43218	24.8	24.8
C(=O)(COC(=C)C=C(C)C)C	-46.6389	222.908		C(COC(CC(C)C)C)(O)C	160.257	3	6	3.74399	-40.5119	197.951	7.43218	23.67	23.67
C(=C)(COC(=C)C=C(C)C)O	-32.8744	235.833		C(COC(CC(C)C)C)(O)C	160.257	3	6	3.74399	-40.5119	197.951	7.43218	29.53	29.53
C(=C)(COC(=C)CC(=C)C)O	-33.2575	226.525		C(COC(CC(C)C)C)(O)C	160.257	3	6	3.74399	-40.5119	197.951	7.43218	31.86	31.86
C(=C)(COC(=CC(=C)C)C)O	-32.726	235.829		C(COC(CC(C)C)C)(O)C	160.257	3	6	3.74399	-40.5119	197.951	7.43218	30.63	30.63
C1(=CC(=C(C)C)C(=C1)N)C	-42.9267	209.038		C1(CC(C(C)C)C(C1)N)C	141.258	3	6	4.24755	-17.5641	172.713	7.93958	19.93	19.93
C1(=CC(=C(C1)N)C(=C)C)C	-33.6307	208.51		C1(CC(C(C)C)C(C1)N)C	141.258	3	6	4.24755	-17.5641	172.713	7.93958	21.45	21.45
C1(=CC(=C(C(=C)C)C1)N)C	-30.9272	208.51		C1(CC(C(C)C)C(C1)N)C	141.258	3	6	4.24755	-17.5641	172.713	7.93958	22.46	22.46
C1(=C)C=C(C(=C(C)C)C1)N	-30.9272	208.51		C1(CC(C(C)C)C(C1)N)C	141.258	3	6	4.24755	-17.5641	172.713	7.93958	21.36	21.36
C(=C)(C1=C(CC(=C)C1)N)C	-34.2197	208.408		C1(CC(C(C)C)C(C1)N)C	141.258	3	6	4.24755	-17.5641	172.713	7.93958	23.97	23.97
C1(=C)C=C(C=C)N(C1)C	-24.7669	177.581		C1(CC(N(C1)C)CC)C	127.231	3	6	4.71583	-40.5616	151.337	7.7811	22.93	22.93
C(C=O)(OC(=C)C(=C)C)(C)C	-46.092	216.407		C(CO)(OC(C(C)C)C)(C)C	160.257	3	6	3.74399	-40.2869	200.509	6.76767	27.51	27.51
C1(C=C)(OC=C(C=C)O1)C	-17.9568	172.334		C1(CC)(OCC(CC)O1)C	144.214	3	6	4.16048	-67.8979	152.492	7.22715	33.27	33.27
C(C=O)(OC(=C)C=C)(C)C	-31.0838	199.709		C(CO)(OC(CC)C)(C)C	146.23	3	6	4.10313	-55.433	182.8	6.87467	27.66	27.66
C(=COC(=C)C(=C)C)(C)C	-78.7776	175.591		C(COC(C(C)C)C)(C)C	144.258	3	6	4.15921	-86.117	153.471	6.43156	31.35	31.35
C(=C)(COC(=C)C(=C)C)C	-79.6106	175.025		C(COC(C(C)C)C)(C)C	144.258	3	6	4.15921	-86.117	153.471	6.43156	30.24	30.24
C(=COC(=C)C(=O)N(C)C)(C)C	-45.2031	229.436		C(COC(C(N(C)C)O)C)(C)C	175.272	3	6	3.42325	-10.5029	211.911	7.51743	19.67	19.67
C(=C)(COC(=C)C(=O)N(C)C)C	-45.1937	223.083		C(COC(C(N(C)C)O)C)(C)C	175.272	3	6	3.42325	-10.5029	211.911	7.51743	18.37	18.37
C(=C)(COC(=C)C(=N)C)C	-54.1281	181.796		C(COC(C(N)C)C)(C)C	145.246	3	6	4.13092	-71.8626	173.659	7.58225	27.21	27.21
C(=COC)(C=NOC=C)C	-30.1962	175.422		C(CNOCC)(COC)C	147.218	3	6	4.07559	-10.1594	148.003	7.04603	28.77	28.77
C(C=O)(C=C(C=C)C)(C)C	-19.4159	200.522		C(CO)(CC(CC)C)(C)C	144.258	3	6	4.15921	-48.7661	178.94	7.06942	21.75	21.75
C(=C)(C=NOC=C)COC	-15.4643	178.103		C(CNOCC)(COC)C	147.218	3	6	4.07559	-10.1594	148.003	7.04603	28.32	28.32
C(C=O)(CC(=C)C=C)(C)C	-21.5733	197.104		C(CO)(CC(CC)C)(C)C	144.258	3	6	4.15921	-48.7661	178.94	7.06942	25.29	25.29
C(=CN(C(=C)C)C)(C=O)C	-45.3188	213.069		C(CO)(CN(C(C)C)C)C	145.246	3	6	4.13092	-19.5078	189.959	7.2616	19.23	19.23
C(=C)(C=O)CN(C(=C)C)C	-45.3067	201.191		C(CO)(CN(C(C)C)C)C	145.246	3	6	4.13092	-19.5078	189.959	7.2616	22.64	22.64
C(=C)(c1ccc(o1)C)O	-26.201	217.158		C1(CCC(C(O)C)O1)C	130.187	3	6	4.60876	-10.1168	185.266	7.81534	24	24
C(C=NC=CC(=C)C)(C)(C)C	-18.4199	170.17		C(CNCCC(C)C)(C)(C)C	157.301	3	6	3.81434	-18.1795	181.431	7.91876	25.11	25.11
C(=CN1C2=CN(C(=C1)C2)C)(C)C	-13.3136	255.874		C(CN2C1CC(N(C1)C)C2)(C)C	168.284	3	6	3.5654	-14.4464	192.09	8.21284	17.8	17.8
C(=C)(CN1C2=CN(C(=C1)C2)C)C	-13.4973	229.353		C(CN2C1CC(N(C1)C)C2)(C)C	168.284	3	6	3.5654	-14.4464	192.09	8.21284	20.63	20.63
C(C=NC(=C)C(=C)C)(C)(C)C	-18.2432	170.098		C(CNC(C(C)C)C)(C)(C)C	157.301	3	6	3.81434	-11.004	178.866	6.90808	25.49	25.49
C(=C)(CN=C(C(=C)C)C)C	-31.7795	165.666		C(CNC(C(C)C)C)(C)C	143.274	3	6	4.18778	-17.1697	154.084	6.88394	25.77	25.77
C(=CN=C(C(=C)C)C)(C)C	-19.0517	170.141		C(CNC(C(C)C)C)(C)C	143.274	3	6	4.18778	-17.1697	154.084	6.88394	23.59	23.59
C(=C)(C=NC(=C(C)C)C)C	-19.0517	170.141		C(CNC(C(C)C)C)(C)C	143.274	3	6	4.18778	-17.1697	154.084	6.88394	23.37	23.37
C(C=NC(=C)C=C)(C)(C)C	-31.0996	166.365		C(CNC(CC)C)(C)(C)C	143.274	3	6	4.18778	-17.229	154.583	7.02871	25.85	25.85
C(CN=C(C=C)C=C)(C)(C)C	-18.1793	170.077		C(CNC(CC)CC)(C)(C)C	157.301	3	6	3.81434	-10.3399	181.459	7.88133	25.93	25.93
C(=Cn1cc(c(OC)c1)OC)(C)C	-36.7917	271.792		C(CN1CC(C(OC)C1)OC)(C)C	187.283	3	6	3.20371	-45.9317	205.917	7.27076	19.94	19.94
C(=C)(Cn1cc(c(OC)c1)OC)C	-36.9033	271.384		C(CN1CC(C(OC)C1)OC)(C)C	187.283	3	6	3.20371	-45.9317	205.917	7.27076	18.88	18.88
C(=CN1C=COC(=C1)C)(C)C	-33.929	206.086		C(CN1CCOC(C1)C)(C)C	157.257	3	6	3.81541	-45.5655	192.394	7.12394	24.59	24.59
C(=CN1C=COC(=C)C1)(C)C	-34.6912	205.63		C(CN1CCOC(C1)C)(C)C	157.257	3	6	3.81541	-45.5655	192.394	7.12394	27.23	27.23
C(=C)(CN1C=COC(=C1)C)C	-34.6912	205.558		C(CN1CCOC(C1)C)(C)C	157.257	3	6	3.81541	-45.5655	192.394	7.12394	27.27	27.27
C(=C)(CN1C=COC(=C)C1)C	-35.5454	204.968		C(CN1CCOC(C1)C)(C)C	157.257	3	6	3.81541	-45.5655	192.394	7.12394	29.92	29.92
C(=Cn1cc(c(c1)C)C)(C)C	-52.2987	205.779		C(CN1CC(C(C1)C)C)(C)C	155.285	3	6	3.86386	-21.228	175.008	7.46893	18.84	18.84
C(=CN1C=C(C(=C)C1)C)(C)C	-24.9823	200.808		C(CN1CC(C(C1)C)C)(C)C	155.285	3	6	3.86386	-21.228	175.008	7.46893	22.4	22.4
C(=C)(Cn1cc(c(c1)C)C)C	-52.1739	204.503		C(CN1CC(C(C1)C)C)(C)C	155.285	3	6	3.86386	-21.228	175.008	7.46893	17.78	17.78
C(=CN1C(=COC=C1)C)(C)C	-33.9292	206.086		C(CN1C(COCC1)C)(C)C	157.257	3	6	3.81541	-45.5645	192.394	7.12394	24.49	24.49
C(=C)(CN1C(=C)COC=C1)C	-35.5458	204.959		C(CN1C(COCC1)C)(C)C	157.257	3	6	3.81541	-45.5645	192.394	7.12394	27.42	27.42
C(=CN1C(=C)COC=C1)(C)C	-34.6915	205.627		C(CN1C(COCC1)C)(C)C	157.257	3	6	3.81541	-45.5645	192.394	7.12394	24.38	24.38
C(=C)(CN1C(=COC=C1)C)C	-34.6915	205.554		C(CN1C(COCC1)C)(C)C	157.257	3	6	3.81541	-45.5645	192.394	7.12394	27.57	27.57
C(=C)(C=N)OC=COC	-28.0439	166.355		C(CN)(OCCOC)C	133.191	3	6	4.50481	-36.4382	161.057	6.83028	30.23	30.23
C(C=N)(CN(C(=C)C=C)C)(C)C	-24.1516	224.455		C(CN)(CN(C(CC)C)C)(C)C	172.316	3	6	3.48197	-23.9144	197.359	7.14719	25.58	25.58
C(=C)(c1occ(c1)C)O	-26.2002	212.725		C1(COC(C(O)C)C1)C	130.187	3	6	4.60876	-10.1123	185.265	7.81534	24.01	24.01
C(=CN(C=C1OC=CO1)C)(C)C	-13.4193	229.17		C(CN(CC1OCCO1)C)(C)C	173.256	3	6	3.46308	-45.4882	200.08	7.84358	29.25	29.25
C(=C)(CN(C=C1OC=CO1)C)C	-13.934	228.567		C(CN(CC1OCCO1)C)(C)C	173.256	3	6	3.46308	-45.4882	200.08	7.84358	31.81	31.81
C(=Cc1n(ccc1)C)(C)C	-61.9722	198.793		C(CC1N(CCC1)C)(C)C	141.258	3	6	4.24755	-28.0225	159.077	7.27115	19.21	19.21
C(=C)(Cc1n(ccc1)C)C	-61.8001	190.817		C(CC1N(CCC1)C)(C)C	141.258	3	6	4.24755	-28.0225	159.077	7.27115	18.56	18.56
C(=Cc1coc(c1)C)(C)C	-87.3453	174.495		C(CC1COC(C1)C)(C)C	142.242	3	6	4.21816	-18.8406	174.382	7.63619	21.29	21.29
C(=CC1=COC(=C)C1)(C)C	-16.0627	183.93		C(CC1COC(C1)C)(C)C	142.242	3	6	4.21816	-18.8406	174.382	7.63619	29.02	29.02
C(=C)(C=C1C=C(OC1)C)C	-16.0627	184.388		C(CC1COC(C1)C)(C)C	142.242	3	6	4.21816	-18.8406	174.382	7.63619	26.05	26.05
C(=CC1=CC(=C)OC1)(C)C	-16.0627	184.388		C(CC1COC(C1)C)(C)C	142.242	3	6	4.21816	-18.8406	174.382	7.63619	25.9	25.9
C(=C)(C=C1COC(=C)C1)C	-18.245	188.48		C(CC1COC(C1)C)(C)C	142.242	3	6	4.21816	-18.8406	174.382	7.63619	27.6	27.6
C(=C)(Cc1cc(oc1)C)C	-87.4921	174.423		C(CC1COC(C1)C)(C)C	142.242	3	6	4.21816	-18.8406	174.382	7.63619	20.66	20.66
C(=C)(CC1=COC(=C)C1)C	-18.245	188.48		C(CC1COC(C1)C)(C)C	142.242	3	6	4.21816	-18.8406	174.382	7.63619	31.83	31.83
C(=C)(CC1=CC(=C)OC1)C	-18.245	188.48		C(CC1COC(C1)C)(C)C	142.242	3	6	4.21816	-18.8406	174.382	7.63619	27.68	27.68
C(=C)OCc1occc1	-37.5777	168.199		C1(OCCC1)COCC	130.187	3	6	4.60876	-69.2963	161.42	6.92271	23.9	23.9
C(=C)(C=C)C(=C(N(C)C)C)O	-10.3005	268.167		N(C(C(C(CC)C)O)C)(C)C	159.273	3	6	3.76712	-53.2808	207.721	7.87561	25.09	25.09
C(=C(C(=C)N(C)C)O)(C=C)C	-10.3852	267.725		N(C(C(C(CC)C)O)C)(C)C	159.273	3	6	3.76712	-53.2808	207.721	7.87561	26.06	26.06
C(=O)(C(=C)C(=C)N(C)C)C	-45.2879	191.199		N(C(C(C(O)C)C)C)(C)C	145.246	3	6	4.13092	-11.5179	189.165	7.85372	21.64	21.64
C(=C(N(C=C)C)C)(C=C)C	-45.383	171.347		N(C(C(CC)C)C)(CC)C	143.274	3	6	4.18778	-50.8868	154.63	7.6314	23.49	23.49
C(=C)(C=NC(C=C)(C)C)C	-31.1099	164.567		C(CC)(NCC(C)C)(C)C	143.274	3	6	4.18778	-13.0728	154.577	7.98776	27.56	27.56
C(=C(N(C)C)C=O)(C=C)C	-45.309	212.841		N(C(C(CC)C)CO)(C)C	145.246	3	6	4.13092	-14.5202	187.65	7.67385	19.92	19.92
C(=NC=COOC)(C=C)C	-10.3109	181.833		C(CC)(NCCOOC)C	147.218	3	6	4.07559	-58.9476	162.84	7.01364	26.23	26.23
C(=O)(C(=C(C=C)C)N(C)C)C	-39.4847	207.199		N(C(C(O)C)C(CC)C)(C)C	159.273	3	6	3.76712	-15.8409	207.498	7.87561	18.05	18.05
C(=Cc1c(cco1)C)(C)C	-87.3419	174.495		C(CC1C(CCO1)C)(C)C	142.242	3	6	4.21816	-18.7834	174.382	7.63619	21.46	21.46
C(=C)(C=C)C(C(=O)C)N(C)C	-45.4466	198.06		N(C(C(O)C)C(CC)C)(C)C	159.273	3	6	3.76712	-15.8409	207.498	7.87561	24.42	24.42
C(=C)(Cc1c(cco1)C)C	-87.4876	174.438		C(CC1C(CCO1)C)(C)C	142.242	3	6	4.21816	-18.7834	174.382	7.63619	20.79	20.79
C(=CC(=C(C=C)C)O)(COC)C	-11.037	223.616		C(CC(C(CC)C)O)(COC)C	174.284	3	6	3.44266	-34.541	222.074	7.77699	26.58	26.58
C(=COC)(CC(=C(C=C)C)O)C	-11.5194	223.624		C(CC(C(CC)C)O)(COC)C	174.284	3	6	3.44266	-34.541	222.074	7.77699	28.66	28.66
C(=C)(CC(=C(C=C)C)O)COC	-11.522	220.176		C(CC(C(CC)C)O)(COC)C	174.284	3	6	3.44266	-34.541	222.074	7.77699	27.72	27.72
C(=C)(C(=O)C=C(N(C)C)C)C	-39.4977	207.146		N(C(CC(C(C)C)O)C)(C)C	159.273	3	6	3.76712	-51.1373	208.056	7.61518	18.67	18.67
C(=C)(C(=O)CC(=C)N(C)C)C	-45.4585	199.978		N(C(CC(C(C)C)O)C)(C)C	159.273	3	6	3.76712	-51.1373	208.056	7.61518	21.94	21.94
C(=CC(=C(N)C)C=C)(N(C)C)C	-10.8965	254.872		N(C(CC(C(N)C)CC)C)(C)C	172.316	3	6	3.48197	-24.8534	197.011	7.78315	20.03	20.03
C(=C)(N(C)C)CC(=C(N)C)C=C	-10.5409	245.204		N(C(CC(C(N)C)CC)C)(C)C	172.316	3	6	3.48197	-24.8534	197.011	7.78315	23.67	23.67
C(=CC(=O)C=C)(N(C)C)C	-45.3065	212.789		N(C(CC(CC)O)C)(C)C	145.246	3	6	4.13092	-11.6884	189.494	7.63027	19.45	19.45
C(=C)(N(C)C)CC(=O)C=C	-45.2938	200.885		N(C(CC(CC)O)C)(C)C	145.246	3	6	4.13092	-11.6884	189.494	7.63027	22.4	22.4
C(=C)(C=C)N(C=C)C	-45.0082	161.892		N(C(CC)C)(CC)C	115.22	3	6	5.20743	-106.364	106.147	7.19731	26.01	26.01
C(=C1C=CN(C1)C)(C=C)C	-24.9333	185.532		N1(CCC(C(CC)C)C1)C	141.258	3	6	4.24755	-28.025	159.04	7.71995	22.67	22.67
C(=Cn1cccc1)(OC)OC	-27.4337	218.074		N1(CCCC1)CC(OC)OC	159.229	3	6	3.76816	-45.3524	200.404	7.76517	21.59	21.59
C(=C)(C(=C)C(=CN(C)C)C)C	-44.5937	185.499		N(CC(C(C(C)C)C)C)(C)C	157.301	3	6	3.81434	-44.685	164.846	7.22437	24.72	24.72
C(=C)(C(=C)C(=C)CN(C)C)C	-44.4253	184.798		N(CC(C(C(C)C)C)C)(C)C	157.301	3	6	3.81434	-44.685	164.846	7.22437	28.98	28.98
C(=C)(C(=C)C(=O)CN(C)C)C	-45.46	199.98		N(CC(C(C(C)C)C)O)(C)C	159.273	3	6	3.76712	-51.9921	207.617	7.51808	23.92	23.92
C(=C)(C(=CN(C)C)C(=O)OC)C	-44.5241	202.159		N(CC(C(C)C)C(OC)O)(C)C	175.272	3	6	3.42325	-10.2261	210.861	7.51743	12.65	12.65
C(=C)(C(=CN(C)C)C=O)C	-45.3084	212.828		N(CC(C(C)C)CO)(C)C	145.246	3	6	4.13092	-14.9962	189.701	7.12028	19.7	19.7
N(CC(=C(C=C)C)C=O)(C)C	-45.4768	207.671		N(CC(C(CC)C)CO)(C)C	159.273	3	6	3.76712	-17.5478	209.05	7.65757	21.9	21.9
C(=C)(C(=O)C=C)CN(C)C	-45.2946	200.941		N(CC(C(CC)O)C)(C)C	145.246	3	6	4.13092	-11.6449	189.422	7.67385	23.55	23.55
C(=CN(C)C)(C(=O)C=C)C	-45.3072	212.805		N(CC(C(CC)O)C)(C)C	145.246	3	6	4.13092	-11.6449	189.422	7.67385	19.94	19.94
C(=C)(C(=O)CN(C)C)C=COC	-33.1038	227.702		N(CC(C(CCOC)C)O)(C)C	175.272	3	6	3.42325	-12.2126	213.322	7.6371	25.12	25.12
C(=CN(C)C)(C=C(C=C)C)C	-46.0858	186.961		N(CC(CC(CC)C)C)(C)C	157.301	3	6	3.81434	-46.8086	173.172	7.45422	22.6	22.6
C(=C)(C=C)CC(=CN(C)C)C	-46.1217	185.848		N(CC(CC(CC)C)C)(C)C	157.301	3	6	3.81434	-46.8086	173.172	7.45422	26.4	26.4
C(=C)(C=C(C=C)C)CN(C)C	-46.1217	185.895		N(CC(CC(CC)C)C)(C)C	157.301	3	6	3.81434	-46.8086	173.172	7.45422	25.55	25.55
C(=CC(=C)C=C)(CN(C)C)C	-46.1217	185.895		N(CC(CC(CC)C)C)(C)C	157.301	3	6	3.81434	-46.8086	173.172	7.45422	26.89	26.89
C(=C)(CN(C)C)CC(=C)C=C	-44.4595	184.163		N(CC(CC(CC)C)C)(C)C	157.301	3	6	3.81434	-46.8086	173.172	7.45422	29.48	29.48
C(=CN(C)C)(C=CC(=NC)C)C	-18.2062	175.035		N(CC(CCC(NC)C)C)(C)C	172.316	3	6	3.48197	-48.1979	197.118	7.63226	20.48	20.48
C(=CN(C)C)(C=C)OC=COC	-45.0831	213.331		N(CC(CC)OCCOC)(C)C	175.272	3	6	3.42325	-39.5588	185.585	6.77206	29.4	29.4
C(=CN(C)C)(C=C(C=O)C)C	-39.5475	214.646		N(CC(CC(CO)C)C)(C)C	159.273	3	6	3.76712	-25.2801	209.031	7.61518	18.66	18.66
C(=C)(C=O)CC(=CN(C)C)C	-45.4737	207.639		N(CC(CC(CO)C)C)(C)C	159.273	3	6	3.76712	-25.2801	209.031	7.61518	21.78	21.78
C(=C)(C=O)C=C(CN(C)C)C	-45.4737	207.648		N(CC(CC(CO)C)C)(C)C	159.273	3	6	3.76712	-25.2801	209.031	7.61518	22.9	22.9
C(=C)(C=C(C=O)C)CN(C)C	-45.4737	207.648		N(CC(CC(CO)C)C)(C)C	159.273	3	6	3.76712	-25.2801	209.031	7.61518	22.03	22.03
C(=C)(CN(C)C)CC(=C)C=O	-45.4593	205.182		N(CC(CC(CO)C)C)(C)C	159.273	3	6	3.76712	-25.2801	209.031	7.61518	24.71	24.71
C(=C)(C=C)NC(=CN(C)C)C	-10.8194	242.475		N(CC(NC(CC)C)C)(C)C	158.289	3	6	3.79054	-52.0759	194.376	7.54913	24.02	24.02
C(=CN(C)C)(C=C)C=C	-63.4722	174.842		N(CC(CC)CC)(C)C	129.247	3	6	4.64227	-74.1211	139.26	7.89232	24.75	24.75
C(=C)(CN(C)C)NC(=C)C=C	-11.0801	241.646		N(CC(NC(CC)C)C)(C)C	158.289	3	6	3.79054	-52.0759	194.376	7.54913	26.16	26.16
C(=CN(C=C)C)(C(=O)C)C	-45.3165	213.037		N(CC)(CC(C(O)C)C)C	145.246	3	6	4.13092	-12.2075	189.72	7.67385	18.29	18.29
C(=C)(C(=O)C)CN(C=C)C	-45.3043	201.151		N(CC)(CC(C(O)C)C)C	145.246	3	6	4.13092	-12.2075	189.72	7.67385	22.48	22.48
C(=CN(C=C)C)(C=C)C	-63.5521	174.801		N(CC)(CC(CC)C)C	129.247	3	6	4.64227	-74.5876	138.69	7.1516	24.23	24.23
C(=C)(C=C)CN(C=C)C	-71.7633	174.271		N(CC)(CC(CC)C)C	129.247	3	6	4.64227	-74.5876	138.69	7.1516	27.98	27.98
C(=C)(N(C=C)C)CN(C=C)C	-18.8932	182.904		N(CC)(CC(N(CC)C)C)C	158.289	3	6	3.79054	-25.2581	176.575	6.49797	24.77	24.77
C(=CN(C=C)C)(N(C=C)C)C	-18.5223	182.927		N(CC)(CC(N(CC)C)C)C	158.289	3	6	3.79054	-25.2581	176.575	6.49797	22.48	22.48
C(=C)N(C=C)C=C	-29.7201	122.334		N(CC)(CC)CC	101.193	3	6	5.92926	-121.819	87.1634	7.69181	24.77	24.77
C(=C)N(C=C)C=COC	-44.8574	164.895		N(CC)(CC)CCOC	131.219	3	6	4.57251	-18.5476	151.634	7.87173	25.31	25.31
C(=C)(C(N(C)C)c1ccc(o1)C)O	-11.6554	269.714		N(C(C(O)C)C1CCC(O1)C)(C)C	187.283	3	6	3.20371	-17.8426	236.921	7.98788	22.82	22.82
C(=O)(C(=CN(C)C)C=C)C	-45.3075	212.828		N(CC(C(O)C)CC)(C)C	145.246	3	6	4.13092	-11.6903	189.523	7.67385	19.01	19.01
C(=COC)c1occc1	-39.4721	172.374		C1(OCCC1)CCOC	130.187	3	6	4.60876	-69.2982	161.42	6.92271	23.07	23.07
N(C=C)(NC(=C(C=C)C)C)C	-10.3488	237.553		N(CC)(NC(C(CC)C)C)C	158.289	3	6	3.79054	-67.4792	177.825	7.71738	24.29	24.29
C(=CC(=O)C=CN(C)C)(C)C	-39.5637	214.653		N(CCC(CC(C)C)O)(C)C	159.273	3	6	3.76712	-15.9695	209.163	7.17162	18.23	18.23
C(=C)(CC(=O)C=CN(C)C)C	-45.4772	216.06		N(CCC(CC(C)C)O)(C)C	159.273	3	6	3.76712	-15.9695	209.163	7.17162	20.13	20.13
C(=C)(C=C)C=CN(C)C	-63.4678	174.851		N(CCC(CC)C)(C)C	129.247	3	6	4.64227	-74.0972	139.298	7.0601	25.39	25.39
C(=CN(C=COC)C)(C(=O)C)C	-32.5473	227.971		N(CCOC)(CC(C(O)C)C)C	175.272	3	6	3.42325	-10.6027	224.245	7.6371	18.76	18.76
C(=C)(C(=O)C)CN(C=COC)C	-33.101	227.687		N(CCOC)(CC(C(O)C)C)C	175.272	3	6	3.42325	-10.6027	224.245	7.6371	22.95	22.95
C(=COC)c1ccoc1	-39.5131	156.13		C1(CCOC)CCOC1	130.187	3	6	4.60876	-69.2982	161.293	6.92271	23.29	23.29
C1(=C(N(C=C)CN1C=C)C)C	-17.1441	192.044		N1(C(C(N(CC)C1)C)C)CC	156.273	3	6	3.83943	-17.6161	179.631	7.22918	21.93	21.93
C(=C)c1n(ccc1)C	-72.1637	160.113		N1(C(CC)CCC1)C	113.204	3	6	5.30017	-43.6828	130.04	7.35033	19.86	19.86
C1(=CN(C=C)C=CO1)C	-19.8098	224.067		N1(CC)CCOC(C1)C	129.203	3	6	4.64386	-48.4572	157.916	7.14574	25.77	25.77
[truncated: 12,365 more rows]
