# Supplementary material for: A computational workflow to discover novel liquid organic hydrogen carriers and their dehydrogenation routes
Source: Royal Society of Chemistry journal article supplement (doi:10.1039/d0me00105h), 2020-01-01
Supplement: d0me00105h1.zip [file 37Pairs.xlsx]

## Sheet: Sheet1
Dehydrogenated Molecules	Melting Point (C)	Boiling Point (C)	Hydrogenated Molecules	Molecular Weight	Number H2s Transferred	MW H2	Hydrogen Weight Percent	Melting Point (C)	Boiling Point (C)	Synthetic Accessibility Score	Heat of Hydrogenation (kcal/mol)	Positive Heat of Hydrogenation (kcal/mol)	CID Numbers
c1(ccccc1)C=NC=C	-59.8328	220.066	C1(CNCC)CCCCC1	141.258	5	10	7.07925	-18.2925	171.483	3.62945	18.86	18.86	[Compound(11171028)]
N(=C)C=Cc1ccccc1	-48.5023	219.943	C1(CCNC)CCCCC1	141.258	5	10	7.07925	-25.7165	176.594	3.62945	20.08	20.08	[Compound(43930)]
C1(=C)C=CC(=CN=C)C=C1	-40.6134	211.877	C1(CCC(CC1)CNC)C	141.258	5	10	7.07925	-25.6337	164.834	3.62945	18.48	18.48	[Compound(18740580)]
c1(C=C)ccncc1	-49.1153	162.979	C1(CC)CCNCC1	113.204	4	8	7.06689	-24.8103	146.192	5.42345	18.4	18.4	[Compound(76704)]
N(=C)c1ccc(C=C)cc1	-40.6216	222.193	C1(CC)CCC(NC)CC1	141.258	5	10	7.07925	-18.3578	164.746	5.45698	20.51	20.51	[Compound(16772581)]
C(=C)(c1ccccc1)C=C	-14.9995	191.625	C1(C(CC)C)CCCCC1	140.27	5	10	7.12911	-82	172.691	6.88759	21.65	21.65	[Compound(23468)]
C(=C)(N=C)c1ccccc1	-40.6061	214.697	C1(C(NC)C)CCCCC1	141.258	5	10	7.07925	-18.3829	164.927	7.15476	20.23	20.23	[Compound(15194968)]
C(=C)c1c(C=C)cccc1	-14.9995	191.616	C1(C(CC)CCCC1)CC	140.27	5	10	7.12911	-82	172.691	7.17485	22.3	22.3	[Compound(550318)]
C(=C)(C=C)c1ccncc1	-56.6096	242.518	C(C1CCNCC1)(CC)C	141.258	5	10	7.07925	-25.5472	164.722	7.27306	20.29	20.29	[Compound(57067325)]
c1(C=C)cccc(C=C)c1	-14.9995	191.616	C1(CC)CCCC(CC)C1	140.27	5	10	7.12911	-82	172.691	7.27832	22.33	22.33	[Compound(519308)]
c1ccccc1	-10.2647	85.7592	C1CCCCC1	84.162	3	6	7.12911	-64.0453	78.613	7.34171	16.56	16.56	[Compound(8078)]
C1(=C)C=C(C(=C1)C=C)C=C	-68.2566	183.839	C1(CC(C(CC)C1)CC)C	140.27	5	10	7.12911	-109.716	168.101	7.36325	23.83	23.83	[Compound(3392533)]
C(=C)c1cccnc1	-49.1171	162.957	C1(CC)CCCNC1	113.204	4	8	7.06689	-24.9228	146.063	7.42399	18.66	18.66	[Compound(202966)]
c1(ncccc1)C=C	-43.784	161.13	C1(CC)NCCCC1	113.204	4	8	7.06689	-18.4173	145.618	7.42399	18.44	18.44	[Compound(94205)]
C1(=C)C(=C)C(=C)C(=C)C=C1	-40.0927	183.803	C1(C(C(C(CC1)C)C)C)C	140.27	5	10	7.12911	-62.1167	160.867	7.55156	15.46	15.46	[Compound(94277)]
C1(=C)C(=N)C(=C)C=C1	-22.8571	188.248	C1(C(C(CC1)C)N)C	113.204	4	8	7.06689	-24.2119	143.234	7.60363	23.57	23.57	[Compound(20401727)]
C1(=C)C=CC(=C1)C=C	-69.6368	141.592	C1(CCC(CC)C1)C	112.216	4	8	7.12911	-117.46	122.747	7.62302	24.59	24.59	[Compound(19502)]
C(=C)c1c(C=C)cncc1	-56.6044	242.588	C1(C(CC)CCNC1)CC	141.258	5	10	7.07925	-18.3709	164.71	7.63616	21.05	21.05	[Compound(20490482)]
C1(=C)C(=C)C=CN=C1	-49.5996	162.959	C1(C(CCNC1)C)C	113.204	4	8	7.06689	-25.013	138.96	7.69438	13.99	13.99	[Compound(14454414)]
C1(=C)C=CC(=C1C=C)C=C	-68.2566	183.839	C1(C(C(CC)CC1)CC)C	140.27	5	10	7.12911	-109.716	168.101	7.70425	24.32	24.32	[Compound(76565807)]
C1(=C)C(=CC(=C1)C=C)C=C	-68.2566	183.839	C1(C(CC)CC(CC)C1)C	140.27	5	10	7.12911	-109.716	168.101	7.70425	24.25	24.25	[Compound(20771100)]
C1(=C)C(=C)C=CC(=C1)C=C	-13.8361	183.839	C1(C(CCC(CC)C1)C)C	140.27	5	10	7.12911	-54.5473	168.101	7.7064	18.94	18.94	[Compound(19010542)]
C1(=C)C=CC(=C)C=C1	-13.5502	141.592	C1(CCC(CC1)C)C	112.216	4	8	7.12911	-84.84	122.747	7.72593	16.02	16.02	[Compound(11523)]
C(=C)c1ccc(C=C)cc1	-14.9995	191.616	C1(CC)CCC(CC)CC1	140.27	5	10	7.12911	-82	172.691	7.72623	22.25	22.25	[Compound(14910)]
C1(=C)C=CC(=C)C(=C1)C=C	-13.8361	183.839	C1(CCC(C(CC)C1)C)C	140.27	5	10	7.12911	-54.5473	168.101	7.75812	19.01	19.01	[Compound(18371935)]
C(=C)(C=C)c1cccnc1	-56.6073	242.518	C(C1CCCNC1)(CC)C	141.258	5	10	7.07925	-18.3707	164.717	7.76104	20.5	20.5	[Compound(59845700)]
N(=C)c1cccc(C=C)c1	-40.6218	222.193	C1(CC)CCCC(NC)C1	141.258	5	10	7.07925	-18.377	164.744	7.77623	20.54	20.54	[Compound(64245292)]
C1(=C)C=CC(=C)N=C1	-49.5982	162.7	C1(CCC(NC1)C)C	113.204	4	8	7.06689	-18.4847	138.362	7.78427	14.48	14.48	[Compound(524018)]
C1(=N)C=CC(=C1)C=C	-16.4004	188.29	C1(CCC(CC)C1)N	113.204	4	8	7.06689	-28.777	147.35	7.80039	22.46	22.46	[Compound(20655700)]
C1(=C)C=CC(=C1)C(=C)C=C	-68.2566	183.839	C1(CCC(C(CC)C)C1)C	140.27	5	10	7.12911	-109.716	168.101	7.84508	24.86	24.86	[Compound(524890)]
C1(=C)C(=C)C=CC(=C1)N=C	-40.6463	212.239	C1(C(CCC(NC)C1)C)C	141.258	5	10	7.07925	-18.46	163.071	7.87222	17.01	17.01	[Compound(57150135)]
c1(C=C)ccccc1	-17.7154	149.775	C1(CC)CCCCC1	112.216	4	8	7.12911	-85.5	130.443	7.89289	20.1	20.1	[Compound(15504)]
n1ccccc1	-40.0073	120.496	N1CCCCC1	85.15	3	6	7.04639	-14.0807	111.045	7.91206	14.47	14.47	[Compound(8082)]
C1(=C)C(=C)C=CC1=N	-22.7789	188.249	C1(C(C(CC1)N)C)C	113.204	4	8	7.06689	-25.5078	143.207	7.91961	24.41	24.41	[Compound(64907229)]
N(=C)c1ccccc1	-20.739	178.101	C1(NC)CCCCC1	113.204	4	8	7.06689	-24.9642	144.239	7.97224	17.89	17.89	[Compound(7514)]
C1(=C)C(=C)C(=N)C(=C1)C=C	-12.0633	206.795	C1(C(C(C(CC)C1)N)C)C	141.258	5	10	7.07925	-15.5639	172.769	8.07284	24.23	24.23	[Compound(123415370)]
C1(=CC(=N)C(=C)C1=C)C=C	-12.571	206.792	C1(C(C(C(CC)C1)C)C)N	141.258	5	10	7.07925	-18.6795	172.825	8.07284	24.18	24.18	[Compound(72589505)]
